# Supplementary material for: Treatment‐related adverse events of antibody–drug conjugates in clinical trials: A systematic review and meta‐analysis
Source: PubMed Central journal article supplement — Cancer. 2022 Nov 21;129(2):283–95. doi: 10.1002/cncr.34507 (PMC10099922; doi:10.1002/cncr.34507), 2022-11-21
Supplement: CNCR-129-283-s001.pdf [file CNCR-129-283-s001.pdf]

**eTable 1.** Search strategy.

**eTable 2.** Main characteristics of studies included in the meta-analysis of the profile of treatment-related adverse events.

**eTable 3.** Main characteristics of randomized controlled trials included in the meta-analysis of comparison of treatment-related adverse events.

**eTable 4.** Risk of bias of each randomized controlled trial included for comparison.

**eTable 5.** Patients with adverse events leading to treatment discontinuation.

**eTable 6.** Incidences of grade 3 or higher adverse events in main payload-conjugates ADCs ( $N \geq 200$ ).

**eTable 7.** Incidences of grade 3 or higher adverse events in main anti-target monoclonal antibody ADCs ( $N \geq 200$ ).

**eTable 8.** Indirect comparison of RCTs.

**eTable 9.** Result of heterogeneity test.

**eFigure 1.** Incidences of treatment-related adverse events leading to treatment discontinuation in each ADC.

**eFigure 2.** Incidences of treatment-related adverse events leading to treatment discontinuation in each payload and target-containing ADC.

**eFigure 3.** Incidences of treatment-related adverse events deaths in each ADC.

**eFigure 4.** Subgroup analysis of overall adverse event incidence in each payload-conjugates ADC.

**eFigure 5.** Subgroup analysis of overall adverse event incidence in each anti-target monoclonal antibody ADC.

**eFigure 6.** Incidences of all-grade adverse events in main payload-conjugates ADCs ( $N \geq 200$ ).

**eFigure 7.** Incidences of all-grade adverse events in main anti-target monoclonal antibody ADCs ( $N \geq 200$ ).

**eFigure 8.** Subgroup analysis of overall adverse event incidence by cancer type.

**eFigure 9.** Funnel plots of the incidence of adverse events.

**eFigure 10.** Egger's plot of the incidence of adverse events.

**eReference**

**eTable 1. Search strategy.**

| <b>Database</b>       | <b>Keywords</b>                                                                                                                                                                                                                                                                              |
|-----------------------|----------------------------------------------------------------------------------------------------------------------------------------------------------------------------------------------------------------------------------------------------------------------------------------------|
| <b>Pubmed</b>         |                                                                                                                                                                                                                                                                                              |
| (1)                   | “antibody-drug conjugates”[Title/Abstract] OR<br>“antibody-drugconjugate”[Title/Abstract] OR<br>“ADC”[Title/Abstract] OR “ADCs”[Title/Abstract]                                                                                                                                              |
| (2)                   | "neoplasms"[Mesh] OR “cancer”[Title/Abstract] OR<br>“carcinoma”[Title/Abstract] OR “tumor”[Title/Abstract]                                                                                                                                                                                   |
| (3)                   | "clinical trials as topic"[MeSH Terms] OR "clinical<br>trial"[Publication Type] OR "phase II "[Title/Abstract] OR<br>"phase III"[Title/Abstract] OR "phase 2"[Title/Abstract] OR<br>"phase 3"[Title/Abstract] OR "clinical trials"[Title/Abstract]                                           |
| (4)                   | ("2000/01/01"[Date - Publication] : "2022/06/07"[Date -<br>Publication])                                                                                                                                                                                                                     |
| (5)                   | #1 AND #2 AND #3 AND #4                                                                                                                                                                                                                                                                      |
| (6)                   | "review"[Article type] OR "meta"[Title] OR<br>"meta-analysis"[Title] OR "protocol"[Title] OR<br>"cost-effectiveness"[Title/Abstract]                                                                                                                                                         |
| (7)                   | #5 NOT #6                                                                                                                                                                                                                                                                                    |
| <b>Embase</b>         |                                                                                                                                                                                                                                                                                              |
| (1)                   | (‘antibody-drug conjugates’ OR ‘antibody-drug conjugate’ OR<br>ADC OR ADCs):ti,ab,kw                                                                                                                                                                                                         |
| (2)                   | (neoplasms OR cancer OR carcinoma OR tumor):ti,ab,kw                                                                                                                                                                                                                                         |
| (3)                   | trial/exp OR 'clinical trials'/exp OR 'phase 2 clinical trial'/exp<br>OR 'phase 3 clinical trial'/exp OR 'phase II clinical trial'/exp<br>OR 'phase III clinical trial'/exp                                                                                                                  |
| (4)                   | [article]/lim OR [article in press]/lim                                                                                                                                                                                                                                                      |
| (5)                   | [humans]/lim                                                                                                                                                                                                                                                                                 |
| (6)                   | [1-1-2000]/sd NOT [07-06-2022]/sd                                                                                                                                                                                                                                                            |
| (7)                   | #1 AND #2 AND #3 AND #4 AND #5 AND #6                                                                                                                                                                                                                                                        |
| <b>Cochrane</b>       |                                                                                                                                                                                                                                                                                              |
| (1)                   | (‘antibody-drug conjugates’ OR ‘antibody-drug conjugate’ OR<br>ADC OR ADCs) AND (neoplasms OR cancer OR carcinoma<br>OR tumor) AND (‘clinical trials’ OR trial) NOT (conference<br>OR review OR meta OR meta-analysis OR cost-effectiveness)<br>(Publication date: 2000-01-01 to 2022-06-07) |
| <b>Web of science</b> |                                                                                                                                                                                                                                                                                              |
| (1)                   | TS=(‘antibody-drug conjugates’ OR ‘antibody-drug conjugate’<br>OR ADC OR ADCs)                                                                                                                                                                                                               |
| (2)                   | TS=(neoplasms OR cancer OR carcinoma OR tumor)                                                                                                                                                                                                                                               |
| (3)                   | TS=(clinical trials OR trial OR “phase II” OR “phase III” OR<br>“phase 2” OR “phase 3”)                                                                                                                                                                                                      |

|            |                                                                          |
|------------|--------------------------------------------------------------------------|
| <b>(4)</b> | TS=(conference OR review OR meta OR meta-analysis OR cost-effectiveness) |
| <b>(5)</b> | #1 AND #2 AND #3 NOT #4(Publication date: 2000-01-01 to 2022-06-07)      |

**eTable 2. Main characteristics of studies included in the meta-analysis of the profile of treatment-related adverse events.**

| Study           | Phase | Trial name or ID | Cancer type                   | ADC agent                         | Payload type | Target agent       | Total patient number, n | Patients with any grade AEs, n (%) | Patients with grade 3 or higher AEs, n (%) | Patients with AEs leading to discontinuation, n (%) | Ref. |
|-----------------|-------|------------------|-------------------------------|-----------------------------------|--------------|--------------------|-------------------------|------------------------------------|--------------------------------------------|-----------------------------------------------------|------|
| Abraham, 2019   | Ib/II | NSABP FB-10      | Breast cancer                 | Trastuzumab Emtansine (T-DM1)     | DM1          | HER2               | 27                      | 27 (100)                           | NA                                         | NA                                                  | (1)  |
| Advani, 2017    | I     | GO0129 5         | NHL CLL                       | Pinatuzumab Vedotin (DCDT2980S)   | MMAE         | CD22               | 91                      | 91 (100)                           | 41 (45)                                    | 17 (19)                                             | (2)  |
| Ailawadhi, 2019 | I     | IMMUN O-003      | MM                            | Lorvotuzumab Mertansine (IMGN901) | DM1          | CD56               | 37                      | 33 (89)                            | 10 (27)                                    | 9 (24)                                              | (3)  |
| Almhanna, 2016  | I     | C26001           | Gastrointestinal malignancies | TAK-264 (MLN0264)                 | MMAE         | Guanylyl Cyclase C | 41                      | 36 (88)                            | 17 (41)                                    | 3 (7)                                               | (4)  |
| Almhanna, 2017  | II    | C26002           | Adenocarcinoma of the G/GEJ   | TAK-264 (MLN0264)                 | MMAE         | Guanylyl Cyclase C | 38                      | NA                                 | NA                                         | 3 (8)                                               | (5)  |
| Almhanna, 2017  | II    | C26003           | Pancreatic adenocarcinoma     | TAK-264 (MLN0264)                 | MMAE         | Guanylyl Cyclase C | 43                      | 32 (74)                            | 15 (35)                                    | 4 (9)                                               | (6)  |

|                   |      |                 | a                    |                                              |                       | Cyclase<br>C |     |          |          |         |      |
|-------------------|------|-----------------|----------------------|----------------------------------------------|-----------------------|--------------|-----|----------|----------|---------|------|
| Ashkar,<br>2021   | II   | IUSCC-<br>0568  | Germ-cell<br>tumors  | Brentuximab<br>Vedotin<br>(SGN-35)           | MMAE                  | CD30         | 18  | 14 (78)  | 2 (11)   | 0 (0)   | (7)  |
| Banerjee,<br>2018 | II   | GO2860<br>9     | Ovarian cancer       | Lifastuzumab<br>Vedotin<br>(DNIB0600A)       | MMAE                  | NaPi2b       | 46  | NA       | NA       | 4 (9)   | (8)  |
| Banerji,<br>2019  | I    | SYD985.<br>001  | Solid tumors         | Trastuzumab<br>Duocarmazine<br>(SYD985)      | <i>seco</i> -DU<br>BA | HER2         | 185 | 171 (92) | 64 (35)  | 38 (21) | (9)  |
| Bardia,<br>2017   | I/II | IMMU-1<br>32-01 | TNBC                 | Sacituzumab<br>Govitecan<br>(hRS7-SN38)      | SN-38                 | Trop-2       | 69  | NA       | NA       | 3 (4)   | (10) |
| Bardia,<br>2019   | I/II | IMMU-1<br>32-01 | TNBC                 | Sacituzumab<br>Govitecan-hziy<br>(hRS7-SN38) | SN-38                 | Trop-2       | 108 | NA       | NA       | 2 (2)   | (11) |
| Bardia,<br>2021   | I/II | IMMU-1<br>32-01 | Epithelial<br>cancer | Sacituzumab<br>Govitecan-hziy<br>(hRS7-SN38) | SN-38                 | Trop-2       | 495 | 483 (98) | 295 (60) | 19 (4)  | (12) |
| Bardia,<br>2021   | III  | IMMU-1<br>32-05 | TNBC                 | Sacituzumab<br>Govitecan<br>(hRS7-SN38)      | SN-38                 | Trop-2       | 258 | 252 (98) | 165 (64) | 12 (5)  | (13) |
| Bendell,<br>2014  | I/II | NA              | Breast cancer        | Glembatumuma<br>b Vedotin<br>(CDX-011)       | MMAE                  | gpNMB        | 48  | NA       | NA       | 6 (13)  | (14) |

|                 |      |                         |               |                                           |                   |       |     |          |         |         |      |
|-----------------|------|-------------------------|---------------|-------------------------------------------|-------------------|-------|-----|----------|---------|---------|------|
| Blackhall, 2021 | III  | TAHOE                   | SCLC          | Rovalpituzumab<br>Tesirine<br>(SC16LD6.5) | PBD               | DLL3  | 287 | NA       | NA      | 38 (13) | (15) |
| Boni, 2022      | I/II | CTMX-<br>M-2009-<br>001 | Solid tumors  | Praluzatamab<br>Ravtansine<br>(CX-2009)   | DM4               | CD166 | 99  | 90 (91)  | 37 (37) | 12 (12) | (16) |
| Brivio, 2021    | I/II | ITCC-05<br>9            | Children ALL  | Inotuzumab<br>Ozogamicin<br>(PF-5208773)  | Calichea<br>micin | CD22  | 25  | 25 (100) | 23 (92) | 2 (8)   | (17) |
| Burris, 2011    | II   | TDM425<br>8g            | Breast cancer | Trastuzumab<br>Emtansine<br>(T-DM1)       | DM1               | HER2  | 112 | NA       | NA      | 4 (4)   | (18) |
| Caimi, 2021     | II   | LOTIS-2                 | DLBCL         | Loncastuximab<br>Tesirine<br>(ADCT-402)   | PBD               | CD19  | 145 | 117 (81) | NA      | 34 (23) | (19) |
| Calvo, 2021     | I    | M15-891                 | SCLC          | Rovalpituzumab<br>Tesirine<br>(SC16LD6.5) | PBD               | DLL3  | 31  | 25 (81)  | 12 (39) | 2 (7)   | (20) |
| Camidge, 2021   | I/Ib | M14-237                 | NSCLC         | Telisotuzumab<br>Vedotin<br>(ABBV-399)    | MMAE              | c-Met | 52  | 42 (81)  | 13 (25) | 12 (23) | (21) |
| Cleary, 2020    | I    | M14-429                 | Solid tumors  | Losatuxizumab<br>Vedotin<br>(ABBV-221)    | MMAE              | EGFR  | 45  | NA       | 8 (18)  | 2 (4)   | (22) |

|                |      |                   |                            |                                                                 |               |              |            |                      |                      |                   |      |
|----------------|------|-------------------|----------------------------|-----------------------------------------------------------------|---------------|--------------|------------|----------------------|----------------------|-------------------|------|
| Coiffier, 2016 | II   | TCD123 33         | DLBCL                      | Coltuximab Ravtansine (SAR3419)                                 | DM4           | CD19         | 52         | 22 (42)              | 5 (10)               | 0 (0)             | (23) |
| Coleman, 2021  | II   | innovaT V 204     | Cervical cancer            | Tisotumab Vedotin (HuMax-TF-AD C)                               | MMAE          | TF           | 102        | 93 (92)              | 28 (28)              | 12 (12)           | (24) |
| Cortes, 2022   | III  | DESTINY-Breast 03 | Breast cancer              | Trastuzumab Deruxtecan (T-DXd)<br>Trastuzumab Emtansine (T-DM1) | DXd<br>DM1    | HER2<br>HER2 | 261<br>263 | 256 (98)<br>226 (87) | 116 (45)<br>104 (40) | 33 (13)<br>13 (5) | (25) |
| Coveler, 2016  | I    | ASG5M E-002       | Pancreatic Gastric cancers | ASG-5ME                                                         | MMAE          | SLC44A 4     | 35<br>15   | 24 (69)<br>14 (93)   | NA                   | 3 (9)<br>3 (20)   | (26) |
| Dang, 2018     | III  | B193100 8         | B-NHL                      | Inotuzumab Ozogamicin (PF-5208773)                              | Calicheamicin | CD22         | 164        | 148 (90)             | 102 (62)             | 39 (32)           | (27) |
| Danila, 2019   | I    | GO0076 8          | CRPC                       | DSTP3086S                                                       | MSTP21 09A    | STEAP1       | 77         | 69 (90)              | 26 (34)              | 17 (22)           | (28) |
| Daver, 2021    | I    | GO3990 2          | AML                        | DCLL9718S                                                       | PBD           | CLL-1        | 18         | 9 (50)               | 2 (11)               | NA                | (29) |
| De Bono, 2019  | I/II | InnovaT V 201     | Solid tumours              | Tisotumab Vedotin (HuMax-TF-AD                                  | MMAE          | TF           | 147        | 146 (99)             | 61 (47)              | 32 (22)           | (30) |

|                      |       |                         |                                   |                                           |                   |                        |     |         |         |         |      |
|----------------------|-------|-------------------------|-----------------------------------|-------------------------------------------|-------------------|------------------------|-----|---------|---------|---------|------|
| De Bono, 2021        | I/Ib  | D9320C00001             | CRPC                              | C)<br>MEDI3726                            | PBD               | PSMA                   | 33  | 30 (91) | 15 (46) | 11 (33) | (31) |
| Demetri, 2021        | I     | M15-394                 | Sarcomas<br>Solid tumors          | ABBV-085                                  | MMAE              | LRRC15                 | 78  | 62 (80) | 19 (24) | 11 (14) | (32) |
| Doi, 2017            | I     | DS8201-A-J101           | Breast cancer<br>G/GEJ<br>tumours | Trastuzumab<br>Deruxtecan<br>(T-DXd)      | DXd               | HER2                   | 24  | NA      | NA      | 3 (13)  | (33) |
| Dotan, 2017          | I/II  | IMMU-130-02             | Colorectal<br>cancer              | Labetuzumab<br>Govitecan<br>(hMN-14-SN38) | SN-38             | CEACA<br>M5<br>(CD66e) | 86  | NA      | NA      | 13 (15) | (34) |
| Eichenaue r, 2017    | II    | Targeted<br>BEACO<br>PP | Classical HL                      | Brentuximab<br>Vedotin<br>(SGN-35)        | MMAE              | CD30                   | 102 | NA      | NA      | NA      | (35) |
| Fanale, 2012         | I     | SG035-001               | Lymphoma                          | Brentuximab<br>Vedotin<br>(SGN-35)        | MMAE              | CD30                   | 44  | NA      | NA      | 13 (30) | (36) |
| Forero-To rres, 2015 | II    | SGN35-015               | Older HL                          | Brentuximab<br>Vedotin<br>(SGN-35)        | MMAE              | CD30                   | 27  | NA      | 13 (48) | 11 (41) | (37) |
| Forero-To rres, 2017 | Ib/II | GO29044                 | DLBCL                             | Polatuzumab<br>Vedotin                    | MMAE              | CD79b                  | 21  | NA      | NA      | 4 (19)  | (38) |
| Garrido-L aguna,     | I     | B7521001                | Solid tumors                      | PF-06647263                               | Calichea<br>micin | EFNA4                  | 60  | 53 (88) | 20 (25) | 12 (38) | (39) |



|                         |      |                  |                         |                                         |       |        |     |          |         |         |      |
|-------------------------|------|------------------|-------------------------|-----------------------------------------|-------|--------|-----|----------|---------|---------|------|
| 2019<br>Geller,<br>2020 | II   | ADVL1<br>522     | Childre's<br>tumors     | Lorvotuzumab<br>Mertansine<br>(IMGN901) | DM1   | CD56   | 61  | 22 (36)  | 20 (33) | NA      | (40) |
| Gerber,<br>2020         | I    | GO2776<br>7      | NSCLC<br>Ovarian cancer | Lifastuzumab<br>Vedotin<br>(DNIB0600A)  | MMAE  | NaPi2b | 87  | 77 (89)  | 41 (47) | 12 (14) | (41) |
| Goldberg,<br>2020       | I    | ADCT-3<br>01-002 | AML<br>ALL              | Camidanlumab<br>Tesirine<br>(ADCT-301)  | PBD   | CD25   | 35  | 20 (57)  | 11 (31) | 4 (11)  | (42) |
| Goss,<br>2018           | II   | M13-379          | Solid tumors            | Depatuzizumab<br>Mafodotin<br>(ABT-414) | MMAF  | EGFR   | 56  | NA       | NA      | 11 (20) | (43) |
| Gray,<br>2017           | I/II | IMMU-1<br>32-01  | SCLC                    | Sacituzumab<br>Govitecan<br>(hRS7-SN38) | SN-38 | Trop-2 | 53  | NA       | NA      | NA      | (44) |
| Hamadani<br>, 2021      | I    | ADCT-4<br>02-101 | B-NHL                   | Loncastuximab<br>Tesirine<br>(ADCT-402) | PBD   | CD19   | 183 | NA       | NA      | 35 (19) | (45) |
| Hamadani<br>, 2021      | I    | ADCT-3<br>01-001 | Lymphoma                | Camidanlumab<br>Tesirine<br>(ADCT-301)  | PBD   | CD25   | 133 | 116 (88) | NA      | 31 (23) | (46) |
| Hamilton,<br>2020       | I    | SCRX00<br>3-001  | Ovarian cancer          | Tamrintamab<br>Pamozirine<br>(SC-003)   | PBD   | DPEP3  | 74  | 64 (87)  | NA      | 14 (19) | (47) |
| Hann,<br>2020           | I    | SCRX00           | Extensive-Stag          | Rovalpituzumab                          | PBD   | DLL3   | 26  | 24 (92)  | NA      | 7 (28)  | (48) |

|                  |      |                         |               |                                         |                  |                |     |          |         |         |      |
|------------------|------|-------------------------|---------------|-----------------------------------------|------------------|----------------|-----|----------|---------|---------|------|
| 2021             |      | 1-004                   | e SCLC        | Tesirine<br>(SC16LD6.5)                 |                  |                |     |          |         |         |      |
| Hassan,<br>2020  | I    | 15051                   | Solid tumors  | Anetumab<br>Ravtansine<br>(BAY94-9343)  | DM4              | Mesothe<br>lin | 148 | 88 (59)  | 26 (18) | 3 (2)   | (49) |
| Heist,<br>2017   | I/II | IMMU-1<br>32-01         | NSCLC         | Sacituzumab<br>Govitecan<br>(hRS7-SN38) | SN-38            | Trop-2         | 54  | NA       | NA      | 2 (4)   | (50) |
| Herrera,<br>2020 | II   | ADCT-3<br>01-201        | HL            | Camidanlumab<br>Tesirine<br>(ADCT-301)  | PBD              | CD25           | 47  | NA       | NA      | 6 (13)  | (51) |
| Herrera,<br>2022 | I/Ib | GO2968<br>7             | B-NHL         | DCDS0780A                               | MMAE             | CD79b          | 60  | 54 (90)  | NA      | 21 (35) | (52) |
| Hong,<br>2021    | I    | BAT-800<br>1-001-C<br>R | Breast cancer | BAT8001                                 | Geldana<br>mycin | HER2           | 29  | 29 (100) | 14 (48) | 0 (0)   | (53) |
| Horwitz,<br>2014 | II   | SGN35-<br>012           | TCL           | Brentuximab<br>Vedotin<br>(SGN-35)      | MMAE             | CD30           | 35  | NA       | NA      | 7 (20)  | (54) |
| Horwitz,<br>2019 | III  | ECHEL<br>ON-2           | TCL           | Brentuximab<br>Vedotin<br>(SGN-35)      | MMAE             | CD30           | 223 | NA       | NA      | 14 (6)  | (55) |
| Hotta,<br>2018   | II   | UMIN00<br>0017709       | NSCLC         | Trastuzumab<br>Emtansine<br>(T-DM1)     | DM1              | HER2           | 15  | NA       | NA      | 2 (13)  | (56) |
| Hurvitz,<br>2018 | II   | BO2197                  | Breast cancer | Trastuzumab                             | DM1              | HER2           | 69  | NA       | 32 (46) | 5 (7)   | (57) |

|                      |      |                          |                         |                                           |       |        |     |          |         |         |      |
|----------------------|------|--------------------------|-------------------------|-------------------------------------------|-------|--------|-----|----------|---------|---------|------|
| 2013                 |      | 6                        |                         | Emtansine<br>(T-DM1)                      |       |        |     |          |         |         |      |
| Jacobsen,<br>2015    | II   | SGN35-<br>012            | DLBCL                   | Brentuximab<br>Vedotin<br>(SGN-35)        | MMAE  | CD30   | 68  | NA       | NA      | 6 (12)  | (58) |
| Jain,<br>2020        | I    | ADCT-4<br>02-102         | B-ALL                   | Loncastuximab<br>Tesirine<br>(ADCT-402)   | PBD   | CD19   | 35  | 19 (54)  | NA      | NA      | (59) |
| Janne,<br>2022       | I    | U31402-<br>A-U102        | NSCLC                   | Patritumab<br>Deruxtecan<br>(HER3-DXd)    | DXd   | HER3   | 81  | 78 (96)  | 38 (47) | 7 (9)   | (60) |
| Ji,<br>2020          | I    | BP29920                  | Breast cancer           | Trastuzumab<br>Emtansine<br>(T-DM1)       | DM1   | HER2   | 11  | 11 (100) | 7 (64)  | 1 (9)   | (61) |
| Johnson,<br>2021     | I    | PROCL<br>AIM-CX<br>-2029 | Solid tumors            | CX-2029                                   | MMAE  | CD71   | 45  | 45 (100) | 27 (60) | 0 (0)   | (62) |
| Johnson,<br>2021     | III  | MERU                     | Extensive-Stage<br>SCLC | Rovalpituzumab<br>Tesirine<br>(SC16LD6.5) | PBD   | DLL3   | 368 | 290 (79) | NA      | 74 (20) | (63) |
| Kalinsky,<br>2020    | I/II | IMMU-1<br>32-01          | Breast cancer           | Sacituzumab<br>Govitecan<br>(hRS7-SN38)   | SN-38 | Trop-2 | 54  | NA       | NA      | 2 (4)   | (64) |
| Kantarjian<br>, 2016 | II   | EFC116<br>03             | ALL                     | Coltuximab<br>Ravtansine                  | DM4   | CD19   | 36  | 22 (61)  | NA      | 5 (14)  | (65) |

|                  |       |                |                         |                                                       |               |            |     |          |          |         |      |
|------------------|-------|----------------|-------------------------|-------------------------------------------------------|---------------|------------|-----|----------|----------|---------|------|
| Kantarjian, 2019 | III   | INO-VA<br>TE   | ALL                     | (SAR3419)<br>Inotuzumab<br>Ozogamicin<br>(PF-5208773) | Calicheamicin | CD22       | 164 | 144 (88) | 115 (70) | 31 (19) | (66) |
| Kashiwaba, 2016  | II    | JO22997        | Breast cancer           | Trastuzumab<br>Emtansine<br>(T-DM1)                   | DM1           | HER2       | 73  | 70 (96)  | 41 (56)  | 2 (3)   | (67) |
| Kelly, 2021      | I/IIa | 983            | MM                      | Indatuximab<br>Ravtansine<br>(BT062)                  | DM4           | CD138      | 64  | NA       | NA       | 9 (14)  | (68) |
| Khan, 2021       | I     | PrECOG<br>0504 | NSCLC                   | Glembatumumab<br>Vedotin<br>(CDX-011)                 | MMAE          | gpNMB      | 13  | NA       | NA       | NA      | (69) |
| Kim, 2015        | II    | IRB-213<br>24  | MF<br>SS                | Brentuximab<br>Vedotin<br>(SGN-35)                    | MMAE          | CD30       | 32  | NA       | 10 (31)  | 6 (19)  | (70) |
| Kim, 2017        | III   | ALCAN<br>ZA    | TCL                     | Brentuximab<br>Vedotin<br>(SGN-35)                    | MMAE          | CD30       | 66  | 57 (86)  | 19 (29)  | 16 (24) | (71) |
| Kim, 2019        | I     | 16897          | Solid tumors            | Aprutumab<br>Ixadotin<br>(BAY 1187982)                | MMAW          | FGFR2      | 20  | 17 (85)  | 9 (45)   | 5 (25)  | (72) |
| Kindler, 2022    | II    | 15743          | Pleural<br>mesothelioma | Anetumab<br>Ravtansine<br>(BAY94-9343)                | DM4           | Mesothelin | 163 | NA       | 78 (48)  | NA      | (73) |
| King,            | I     | B740100        | Solid tumors            | PF-06664178                                           | Aur0101       | Trop-2     | 31  | NA       | 14 (45)  | 3 (10)  | (74) |

|                              |     |                        |                              |                                         |      |                       |     |         |         |         |      |  |
|------------------------------|-----|------------------------|------------------------------|-----------------------------------------|------|-----------------------|-----|---------|---------|---------|------|--|
| 2018                         |     | 1                      |                              | (RN927C)                                |      |                       |     |         |         |         |      |  |
| Kollmann<br>sberger,<br>2021 | II  | AGS-16<br>C3F-15-<br>3 | RCC                          | AGS-16C3F                               | MMAF | ENPP3                 | 67  | 53 (79) | 17 (26) | 7 (5)   | (75) |  |
| Kollmann<br>sberger,<br>2021 | I   | 15383                  | Solid tumors                 | LY3076226                               | DM4  | FGFR3                 | 25  | 20 (80) | 2 (8)   | 0 (0)   | (76) |  |
| Kopp,<br>2019                | II  | AOST15<br>21           | Osteosarcoma                 | Glembatumuma<br>b Vedotin<br>(CDX-011)  | MMAE | gpNMB                 | 22  | NA      | NA      | NA      | (77) |  |
| Krop,<br>2012                | II  | BO2285<br>7            | Breast cancer                | Trastuzumab<br>Emtansine<br>(T-DM1)     | DM1  | HER2                  | 110 | NA      | NA      | 7 (6)   | (78) |  |
| Krop,<br>2015                | II  | BO2285<br>7            | Early-stage<br>breast cancer | Trastuzumab<br>Emtansine<br>(T-DM1)     | DM1  | HER2                  | 148 | NA      | 61 (41) | 20 (14) | (79) |  |
| Krop,<br>2017                | III | TH3RES<br>A            | Breast cancer                | Trastuzumab<br>Emtansine<br>(T-DM1)     | DM1  | HER2                  | 403 | NA      | NA      | 59 (15) | (80) |  |
| Lassman,<br>2019             | I   | M12-356                | Glioblastoma                 | Depatuxizumab<br>Mafodotin<br>(ABT-414) | MMAF | EGFR                  | 60  | NA      | 24 (40) | 4 (7)   | (81) |  |
| Lemech,<br>2020              | I   | M15-916                | Solid tumors                 | ABBV-176                                | PBD  | Prolactin<br>receptor | 19  | 14 (73) | 6 (32)  | 3 (16)  | (82) |  |
| Li,<br>2018                  | II  | 15-335                 | Lung cancer                  | Trastuzumab<br>Emtansine                | DM1  | HER2                  | 18  | NA      | NA      | 0 (0)   | (83) |  |

|                   |      |                        |                                    |                                                 |         |        |     |          |         |         |      |
|-------------------|------|------------------------|------------------------------------|-------------------------------------------------|---------|--------|-----|----------|---------|---------|------|
| Li,<br>2022       | II   | DESTIN<br>Y-Lung0<br>1 | NSCLC                              | (T-DM1)<br>Trastuzumab<br>Deruxtecan<br>(T-DXd) | DXd     | HER2   | 91  | 88 (97)  | 42 (46) | 23 (25) | (84) |
| Liu,<br>2016      | I    | GO0076<br>6            | Ovarian or<br>Pancreatic<br>cancer | DMUC5754A                                       | MMAE    | MUC16  | 77  | 71 (92)  | NA      | 6 (8)   | (85) |
| Liu,<br>2021      | I    | GO2921<br>3            | Ovarian cancer                     | DMUC4064A                                       | MMAE    | MUC16  | 65  | 55 (85)  | 16 (25) | 12 (18) | (86) |
| Lonial,<br>2021   | II   | DREAM<br>M-2           | MM                                 | Belantamab<br>Mafodotin<br>(GSK2857916)         | MMAF    | CD38   | 95  | 84 (88)  | 54 (57) | 9 (9)   | (87) |
| Loriot,<br>2020   | II   | TROPH<br>Y-U-01        | Urothelial<br>cancer               | Sacituzumab<br>Govitecan<br>(hRS7-SN38)         | SN-38   | Trop-2 | 113 | 107 (95) | NA      | 7 (6)   | (88) |
| Lynch,<br>2021    | I/II | RG1714<br>038          | HL                                 | Brentuximab<br>Vedotin<br>(SGN-35)              | MMAE    | CD30   | 45  | NA       | NA      | 11 (24) | (89) |
| Maitland,<br>2021 | I    | B766100<br>1           | Solid tumors                       | Cofetuzumab<br>Pelidotin<br>(PF-06647020)       | Aur0101 | PTK7   | 112 | 96 (86)  | 44 (39) | 3 (3)   | (90) |
| Malhotra,<br>2021 | I/II | M16-300                | Extensive-Stage<br>SCLC            | Rovalpituzumab<br>Tesirine<br>(SC16LD6.5)       | PBD     | DLL3   | 42  | 41 (98)  | 27 (64) | 6 (14)  | (91) |

|                 |      |                   |                |                                     |               |             |     |          |          |         |      |
|-----------------|------|-------------------|----------------|-------------------------------------|---------------|-------------|-----|----------|----------|---------|------|
| Mansfield, 2021 | I/II | SCRX001-006       | Solid tumors   | Rovalpituzumab Tesirine (SC16LD6.5) | PBD           | DLL3        | 200 | 181 (91) | 97 (49)  | 48 (24) | (92) |
| Medeiros, 2018  | I/II | 090516            | AML            | Gemtuzumab Ozogamicin               | Calicheamicin | CD33        | 50  | NA       | NA       | NA      | (93) |
| Modi, 2020      | Ib   | DS8201-A-J101     | Breast cancer  | Trastuzumab Deruxtecan (T-DXd)      | DXd           | HER2        | 54  | NA       | NA       | 11 (20) | (94) |
| Modi, 2020      | II   | DESTINY-Breast 01 | Breast cancer  | Trastuzumab Deruxtecan (T-DXd)      | DXd           | HER2        | 184 | 183 (99) | 89 (48)  | 27 (15) | (95) |
| Modi, 2022      | III  | DESTINY-Breast 04 | Breast cancer  | Trastuzumab Deruxtecan (T-DXd)      | DXd           | HER2        | 373 | 369 (99) | 195 (53) | 56 (15) | (96) |
| Moore, 2018     | Ib   | FORWARD II        | Ovarian cancer | Mirvetuximab Soravtansine (IMGN853) | DM4           | FR $\alpha$ | 18  | NA       | NA       | 1 (6)   | (97) |
| Moore, 2020     | Ib   | GO29006           | Ovarian cancer | Lifastuzumab Vedotin (DNIB0600A)    | MMAE          | NaPi2b      | 41  | 40 (98)  | 30 (73)  | 7 (17)  | (98) |
| Moore, 2021     | III  | FORWARD I         | Ovarian cancer | Mirvetuximab Soravtansine (IMGN853) | DM4           | FR $\alpha$ | 243 | 230 (95) | 61 (25)  | 11 (5)  | (99) |

|                           |      |                     |                        |                                                     |                   |               |          |          |          |                    |       |
|---------------------------|------|---------------------|------------------------|-----------------------------------------------------|-------------------|---------------|----------|----------|----------|--------------------|-------|
| Morgenszt<br>ern,<br>2019 | II   | TRINIT<br>Y         | SCLC                   | Rovalpituzumab<br>Tesirine<br>(SC16LD6.5)           | PBD               | DLL3          | 339      | 308 (91) | 135 (40) | 33 (10)            | (100) |
| Morgenszt<br>ern,<br>2020 | I/Ib | SCRX00<br>2-001     | SCLC<br>LCNEC          | SC-002<br>(SC-DR002)                                | PBD               | DLL3          | 35       | 28 (80)  | NA       | 13 (37)            | (101) |
| Morschha<br>user,<br>2019 | II   | ROMUL<br>US         | DLBCL                  | Polatuzumab<br>Vedotin or<br>Pinatuzumab<br>Vedotin | MMAE<br>MMAE      | CD79b<br>CD22 | 39<br>42 | NA       | NA       | 12 (31)<br>18 (43) | (102) |
| Morschha<br>user,<br>2019 | II   | ROMUL<br>US         | Follicular<br>lymphoma | Polatuzumab<br>Vedotin or<br>Pinatuzumab<br>Vedotin | MMAE<br>MMAE      | CD79b<br>CD22 | 20<br>21 | NA       | NA       | 11 (55)<br>16 (76) | (102) |
| Narayan,<br>2020          | I    | 13-040              | AML                    | Brentuximab<br>Vedotin<br>(SGN-35)                  | MMAE              | CD30          | 22       | NA       | NA       | NA                 | (103) |
| Narita,<br>2021           | I/II | INTELL<br>ANCE-J    | Malignant<br>glioma    | Depatuxizumab<br>Mafodotin<br>(ABT-414)             | MMAF              | EGFR          | 53       | NA       | NA       | 1 (5)              | (104) |
| O'Brien,<br>2019          | II   | AALL16<br>21        | B-ALL                  | Inotuzumab<br>Ozogamicin<br>(PF-5208773)            | Calichea<br>micin | CD22          | 48       | NA       | NA       | NA                 | (105) |
| Ogura,<br>2014            | I/II | JapicCTI<br>-111650 | HL<br>sALCL            | Brentuximab<br>Vedotin<br>(SGN-35)                  | MMAE              | CD30          | 20       | NA       | NA       | 1 (5)              | (106) |



|                       |      |              |                                 |                                     |               |             |     |          |          |         |       |
|-----------------------|------|--------------|---------------------------------|-------------------------------------|---------------|-------------|-----|----------|----------|---------|-------|
| O'Malley, 2020        | Ib   | IMGN853-0402 | Ovarian cancer                  | Mirvetuximab Soravtansine (IMGN853) | DM4           | FR $\alpha$ | 66  | 65 (98)  | NA       | 19 (29) | (107) |
| Ott, 2014             | I/II | CR011-CLN-11 | Melanoma                        | Glembatumumab Vedotin (CDX-011)     | MMAE          | gpNMB       | 117 | NA       | NA       | 11 (9)  | (108) |
| Ott, 2019             | II   | CDX011-05    | Melanoma                        | Glembatumumab Vedotin (CDX-011)     | MMAE          | gpNMB       | 62  | 55 (89)  | 21 (34)  | 4 (6)   | (109) |
| Owonikoko, 2016       | I    | MDX1203-01   | RCC<br>B-NHL                    | BMS-936561 (MDX-1203)               | Calicheamicin | CD70        | 26  | 26 (26)  | 9 (35)   | 11 (42) | (110) |
| Ozcan, 2021           | IV   | B1931030     | ALL                             | Inotuzumab Ozogamicin (PF-5208773)  | Calicheamicin | CD22        | 22  | 13 (59)  | NA       | 2 (9)   | (111) |
| Pal, 2019             | I    | SGN70A-001   | RCC                             | SGN-CD70A                           | PBD           | CD70        | 18  | NA       | NA       | 5 (28)  | (112) |
| Palanca-Wessels, 2015 | I    | GO01294      | NHL<br>CLL                      | Polatuzumab Vedotin                 | MMAE          | CD79b       | 95  | NA       | NA       | 23 (51) | (113) |
| Pegram, 2021          | I/II | D5760C00001  | Breast cancer<br>Gastric cancer | MEDI4276                            | DM1           | HER2        | 47  | 43 (92)  | 17 (36)  | 5 (11)  | (114) |
| Peng, 2021            | II   | RC48-C008    | G/GEJ cancer                    | RC48-ADC                            | MMAE          | HER2        | 125 | 122 (98) | 40 (32)  | 18 (14) | (115) |
| Perez, 2017           | III  | MARIA NNE    | Breast cancer                   | Trastuzumab Emtansine               | DM1           | HER2        | 361 | 357 (99) | 164 (45) | 66 (18) | (116) |

(T-DM1)

|                     |     |                     |                         |                                     |                                   |          |     |          |          |         |       |
|---------------------|-----|---------------------|-------------------------|-------------------------------------|-----------------------------------|----------|-----|----------|----------|---------|-------|
| Perez,<br>2017      | III | MARIA<br>NNE        | Breast cancer           | Trastuzumab<br>Emtansine<br>(T-DM1) | DM1                               | HER2     | 366 | 361 (98) | 169 (46) | 70 (19) | (116) |
| Peters,<br>2019     | II  | BO2938<br>9         | NSCLC                   | Trastuzumab<br>Emtansine<br>(T-DM1) | DM1                               | HER2     | 49  | NA       | NA       | 1 (2)   | (117) |
| Petrylak,<br>2019   | I   | PSMA<br>ADC<br>1301 | CRPC                    | PSMA ADC                            | MMAE                              | PSMA     | 52  | NA       | NA       | 0 (0)   | (118) |
| Ribrag,<br>2014     | I   | TED682<br>8         | B-NHL                   | SAR3419                             | DM4                               | CD19     | 69  | NA       | NA       | NA      | (119) |
| Rosen,<br>2020      | I   | B750100<br>1        | Solid tumors            | PF-06650808                         | Auristati<br>n-based<br>cytotoxic | Notch3   | 40  | 35 (88)  | 21 (53)  | 3 (8)   | (120) |
| Rosenberg<br>, 2019 | II  | SGN22E<br>-001      | Urothelial<br>carcinoma | Enfortumab<br>Vedotin<br>(ASG-22CE) | MMAE                              | Nectin-4 | 125 | 117 (94) | 68 (54)  | 15 (12) | (121) |
| Rosenberg<br>, 2020 | I   | EV-101              | Urothelial<br>carcinoma | Enfortumab<br>Vedotin<br>(ASG-22CE) | MMAE                              | Nectin-4 | 155 | 145 (94) | 53 (34)  | 16 (10) | (122) |
| Rosenthal,<br>2019  | I   | 2009050<br>5        | Malignant<br>glioma     | AMG 595                             | DM1                               | EGFR     | 32  | 28 (88)  | 17 (53)  | 3 (9)   | (123) |

|               |       |            |                      |                                     |             |                   |          |                    |                    |         |       |
|---------------|-------|------------|----------------------|-------------------------------------|-------------|-------------------|----------|--------------------|--------------------|---------|-------|
| Ross, 2006    | II    | SG0002-015 | NSCLC                | SGN-15 (cBR96-Doxorubicin)          | Doxorubicin | Le <sup>y</sup>   | 59       | NA                 | NA                 | NA      | (124) |
| Rottey, 2022  | I/IIa | CA008-002  | Solid tumors         | BMS-986148                          | DM4         | Mesothelin        | 96<br>30 | 83 (86)<br>27 (90) | 45 (47)<br>10 (33) | 17 (13) | (125) |
| Rudin, 2017   | I/II  | SCRX16-001 | SCLC                 | Rovalpituzumab Tesirine (SC16LD6.5) | PBD         | DLL3              | 74       | 65 (88)            | 28 (38)            | 18 (22) | (126) |
| Sandhu, 2020  | I     | GO27935    | Melanoma             | DEDN6526A                           | MMAE        | ET <sub>B</sub> R | 53       | 51 (96)            | 22 (42)            | 5 (9)   | (127) |
| Sehn, 2020    | Ib/II | GO29365    | DLBCL                | Polatuzumab Vedotin                 | MMAE        | CD79b             | 39       | NA                 | NA                 | NA      | (128) |
| Shah, 2016    | I     | IMGN-002   | Solid tumors         | Lorvotuzumab Mertansine (IMGN901)   | DM1         | CD56              | 97       | 73 (75)            | 36 (37)            | 6 (6)   | (129) |
| Shapiro, 2017 | I     | B4481001   | Solid tumors         | PF-06263507                         | MMAF        | 5T4               | 26       | 22 (85)            | 3 (12)             | 3 (12)  | (130) |
| Sharman, 2019 | II    | SGN35-013  | Solid tumors         | Brentuximab Vedotin (SGN-35)        | MMAE        | CD30              | 63       | 46 (73)            | NA                 | 6 (10)  | (131) |
| Sheng, 2021   | II    | RC48-C005  | Urothelial carcinoma | RC48-ADC                            | MMAE        | HER2              | 43       | 43 (100)           | 25 (58)            | 11 (26) | (132) |

|                   |      |                            |                         |                                         |          |             |          |               |                    |         |       |
|-------------------|------|----------------------------|-------------------------|-----------------------------------------|----------|-------------|----------|---------------|--------------------|---------|-------|
| Shimizu,<br>2021  | I    | MORAb<br>-202-J08<br>1-101 | Solid tumors            | MORAb-202                               | Eribulin | FR $\alpha$ | 22       | 21 (95)       | 3 (14)             | 1 (5)   | (133) |
| Shitara,<br>2019  | I    | DS8201-<br>A-J101          | Gastric cancer          | Trastuzumab<br>Deruxtecan<br>(T-DXd)    | DXd      | HER2        | 44       | 43 (98)       | 28 (64)            | 5 (11)  | (134) |
| Shitara,<br>2020  | II   | DESTIN<br>Y-Gastri<br>c01  | Gastric cancer          | Trastuzumab<br>Deruxtecan<br>(T-DXd)    | DXd      | HER2        | 125      | 122 (98)      | 94 (75)            | 12 (10) | (135) |
| Siena,<br>2021    | II   | DESTIN<br>Y-CRC0<br>1      | Colorectal<br>cancer    | Trastuzumab<br>Deruxtecan<br>(T-DXd)    | DXd      | HER2        | 78       | 73 (94)       | 38 (49)            | 2 (3)   | (136) |
| Socinski,<br>2017 | I/II | Immuno<br>gen 0007         | Extensive-Stage<br>SCLC | Lorvotuzumab<br>Mertansine<br>(IMGN901) | DM1      | CD56        | 33<br>94 | NA<br>90 (96) | 30 (91)<br>83 (88) | 37 (29) | (137) |
| Starodub,<br>2015 | I/II | IMMU-1<br>32-01            | Solid tumors            | Sacituzumab<br>Govitecan<br>(hRS7-SN38) | SN-38    | Trop-2      | 25       | NA            | NA                 | NA      | (138) |
| Stathis,<br>2018  | I    | IMGN03<br>01               | B-NHL                   | IMGN529                                 | DM1      | CD37        | 49       | NA            | NA                 | 5 (10)  | (139) |
| Stein,<br>2018    | I    | SGN33A<br>-001             | AML                     | Vadastuximab<br>Talirine<br>(SGN-CD33A) | PBD      | CD33        | 131      | NA            | NA                 | 34 (26) | (140) |
| Stewart,<br>2019  | I    | GO2782<br>5                | MM                      | DFRF4539A                               | MMAE     | FcRH5       | 39       | 30 (77)       | 9 (23)             | 7 (18)  | (141) |

|                 |      |                     |                      |                                                 |      |          |     |          |          |         |       |
|-----------------|------|---------------------|----------------------|-------------------------------------------------|------|----------|-----|----------|----------|---------|-------|
| Straus, 2021    | III  | ECHEL ON-1          | Classical HL         | Brentuximab Vedotin (SGN-35)                    | MMAE | CD30     | 662 | 641 (97) | 549 (83) | 88 (13) | (142) |
| Strickler, 2018 | I/Ib | M14-237             | Solid tumors         | Telisotuzumab Vedotin (ABBV-399)                | MMAE | c-Met    | 48  | 34 (71)  | 8 (17)   | 11 (23) | (143) |
| Takahashi, 2020 | I    | 7465-CL-0101        | Urothelial carcinoma | Enfortumab Vedotin (ASG-22CE)                   | MMAE | Nectin-4 | 17  | 15 (88)  | NA       | 3 (18)  | (144) |
| Takahashi, 2021 | I    | DS8201-A-A104       | Solid tumors         | Trastuzumab Deruxtecan (T-DXd)                  | DXd  | HER2     | 40  | 38 (95)  | 17 (43)  | 7 (18)  | (145) |
| Tamura, 2019    | I    | DS8201-A-J101       | Breast cancer        | Trastuzumab Deruxtecan (T-DXd)                  | DXd  | HER2     | 115 | 113 (98) | 57 (50)  | 13 (11) | (146) |
| Tannir, 2014    | I    | SGN75-001           | NHL<br>RCC           | SGN-75                                          | MMAF | CD70     | 47  | 38 (81)  | NA       | 14 (24) | (147) |
| Terui, 2021     | II   | JO40762             | DLBCL                | Polatuzumab Vedotin                             | MMAE | CD79b    | 35  | 33 (94)  | NA       | 7 (20)  | (148) |
| Thompson, 2018  | I    | 2009002             | RCC                  | AGS-16M8F                                       | MMAF | ENPP3    | 26  | 26 (100) | 16 (62)  | 1 (4)   | (149) |
| Thungappa, 2022 | III  | CTRI/2018/07/014881 | Breast cancer        | Trastuzumab Emtansine (ZRC-3256)<br>Trastuzumab | DM1  | HER2     | 168 | NA       | NA       | 0 (0)   | (150) |

|                          |     |                   |              |                                                |      |       |          |          |          |         |       |
|--------------------------|-----|-------------------|--------------|------------------------------------------------|------|-------|----------|----------|----------|---------|-------|
| Tilly,<br>2022           | III | POLARI<br>X       | DLBCL        | Emtansine<br>(T-DM1)<br>Polatuzumab<br>Vedotin | MMAE | CD79b | 435      | 426 (98) | 264 (61) | 27 (6)  | (151) |
| Tolaney,<br>2020         | I   | GO2914<br>6       | Solid tumors | DLYE5953A                                      | MMAE | LY6E  | 68       | 63 (93)  | 17 (25)  | 5 (7)   | (152) |
| Trněný,<br>2018          | II  | ARD102<br>48      | DLBCL        | Coltuximab<br>Ravtansine<br>(SAR3419)          | DM4  | CD19  | 61       | 33 (54)  | NA       | 4 (7)   | (153) |
| Trudel,<br>2019          | I   | 117159            | MM           | GSK2857916                                     | MMAF | BCMA  | 35       | NA       | NA       | 4 (11)  | (154) |
| Tsurutani,<br>2020       | I   | DS8201-<br>A-J101 | Solid tumors | Trastuzumab<br>Deruxtecan<br>(T-DXd)           | DXd  | HER2  | 59       | NA       | NA       | 5 (9)   | (155) |
| Udagawa,<br>2019         | I   | SCRX00<br>1-008   | SCLC         | Rovalpituzumab<br>Tesirine<br>(SC16LD6.5)      | PBD  | DLL3  | 29       | 29 (100) | 15 (52)  | 4 (14)  | (156) |
| Vahdat,<br>2021          | Iib | METRI<br>C        | TNBC         | Glembatumuma<br>b Vedotin<br>(CDX-011)         | MMAE | gpNMB | 213      | 211 (99) | 150 (70) | 31 (15) | (157) |
| Van Den<br>Bent,<br>2020 | II  | EORTC<br>1410     | Glioblastoma | Depatuxizumab<br>Mafodotin<br>(ABT-414)        | MMAF | EGFR  | 84<br>88 | NA       | NA       | 12 (7)  | (158) |

|                     |      |               |                      |                                  |       |             |     |          |          |          |       |
|---------------------|------|---------------|----------------------|----------------------------------|-------|-------------|-----|----------|----------|----------|-------|
| Verma, 2012         | III  | EMILIA        | Breast cancer        | Trastuzumab Emtansine (T-DM1)    | DM1   | HER2        | 490 | 470 (96) | 200 (41) | 29 (6)   | (159) |
| Vij, 2020           | I/Ib | M14-467       | MM                   | ABBV-838                         | MMAE  | SLAMF 7/CS1 | 75  | 55 (71)  | 30 (40)  | 16 (21)  | (160) |
| Von Minckwitz, 2019 | III  | KATHERINE     | Breast cancer        | Trastuzumab Emtansine (T-DM1)    | DM1   | HER2        | 740 | 731 (99) | 190 (26) | 133 (18) | (161) |
| Waqar, 2021         | II   | S1400K        | Lung Cancer          | Telisotuzumab Vedotin (ABBV-399) | MMAE  | c-Met       | 23  | NA       | 7 (30)   | NA       | (162) |
| Weekes, 2016        | I    | DMO49 93g     | Ovarian Cancer       | DMOT4039A                        | MMAE  | Mesothelin  | 71  | 39 (72)  | 14 (26)  | 4 (6)    | (163) |
| Yardley, 2015       | II   | EMERGE        | Breast cancer        | Glembatumumab Vedotin (CDX-011)  | MMAE  | gpNMB       | 96  | 87 (91)  | 39 (40)  | 8 (8)    | (164) |
| Younes, 2010        | I    | SG035-001     | Lymphomas            | Brentuximab Vedotin (SGN-35)     | MMAE  | CD30        | 45  | NA       | NA       | 12 (27)  | (165) |
| Yu, 2021            | II   | EV-201        | Urothelial carcinoma | Enfortumab Vedotin (ASG-22CE)    | MMAE  | Nectin-4    | 89  | 86 (97)  | 49 (55)  | 14 (16)  | (166) |
| Zhang, 2022         | I    | ACE-Breast-01 | Breast cancer        | ARX788                           | AS269 | HER2        | 69  | 67 (97)  | 8 (12)   | 2 (3)    | (167) |

|                  |      |                   |                                   |                                    |      |      |    |         |         |        |       |
|------------------|------|-------------------|-----------------------------------|------------------------------------|------|------|----|---------|---------|--------|-------|
| Zinzani,<br>2019 | I/II | CheckM<br>ate 436 | Mediastinal<br>B-cell<br>lymphoma | Brentuximab<br>Vedotin<br>(SGN-35) | MMAE | CD30 | 30 | 25 (83) | 16 (53) | 5 (17) | (168) |
|------------------|------|-------------------|-----------------------------------|------------------------------------|------|------|----|---------|---------|--------|-------|

---

Abbreviation: ID, Identification; ADC, antibody-drug conjugate; AEs, Adverse Events; BHL, non-Hodgkin lymphoma; CLL, chronic lymphocytic leukemia; MM, multiple myeloma; G/GEJ, the stomach or gastroesophageal junction; TNBC, Triple-Negative Breast Cancer; ALL, acute lymphoblastic leukemia; DLBCL, diffuse large B-cell lymphoma; SCLC, small cell lung cancer; NSLCL, non-small cell lung cancer; B-NHL, B-cell non-Hodgkin lymphoma; CRPC, castration-resistant prostate cancer; AML, Acute myeloid leukemia; PBD, pyrrolbenzodiazepine; HL, Hodgkin's lymphoma; TCL, T-cell lymphomas; B-ALL, B-cell acute lymphoblastic leukemia; MF, mycosis fungoides; SS, Sézary syndrome; RCC, renal cell carcinoma; LCNEC, large cell neuroendocrine carcinoma; MEC, mitoxantrone+etoposide+cytarabine; RT, radiotherapy; sALCL, systemic anaplastic large-cell lymphoma; PSMA, prostate-specific membrane antigen; ET<sub>B</sub>R, endothelin B receptor.



**eTable 3. Main characteristics of randomized controlled trials included in the meta-analysis of comparison of treatment-related adverse events.**

| Study           | Phase | Trial name or ID | Cancer type    | ADC agent                           | Payload type | Target agent | Controlled agent                  | Total patient number in ADC arm, n | Patients with any grade AEs in ADC arm, n (%) | Patients with grade 3 or higher AEs in ADC arm, n (%) | Total patient number in controlled arm, n | Patients with any grade AEs in controlled arm, n (%) | Patients with grade 3 or higher AEs in controlled arm, n (%) | Ref. |
|-----------------|-------|------------------|----------------|-------------------------------------|--------------|--------------|-----------------------------------|------------------------------------|-----------------------------------------------|-------------------------------------------------------|-------------------------------------------|------------------------------------------------------|--------------------------------------------------------------|------|
| Banerjee, 2018  | II    | GO28609          | Ovarian cancer | Lifastuzumab vedotin (DNIB0600A)    | MMAE         | NaPi2b       | Pegylated, liposomal, doxorubicin | 46                                 | NA                                            | NA                                                    | 47                                        | NA                                                   | NA                                                           | (8)  |
| Bardia, 2021    | III   | IMMU-132-05      | TNBC           | Sacituzumab Govitecan (hRS7-SN38)   | SN-38        | Trop-2       | Chemotherapy                      | 258                                | 252 (98)                                      | 165 (64)                                              | 224                                       | 192 (86)                                             | 104 (47)                                                     | (13) |
| Blackhall, 2021 | III   | TAHO E           | SCLC           | Rovalpituzumab Tesirine (SC16LD6.5) | SG3199       | DLL3         | Topotecan                         | 287                                | NA                                            | NA                                                    | 129                                       | NA                                                   | NA                                                           | (15) |

|                  |     |                  |                      |                                     |               |      |                                                          |     |          |          |     |          |          |      |
|------------------|-----|------------------|----------------------|-------------------------------------|---------------|------|----------------------------------------------------------|-----|----------|----------|-----|----------|----------|------|
| Cortes, 2022     | III | DESTINY-Breast03 | Breast cancer        | Trastuzumab Deruxtecan (T-DXd)      | DXd           | HER2 | Trastuzumab emtansine                                    | 257 | 256 (98) | 116 (45) | 261 | 228 (87) | 105 (40) | (25) |
| Dang, 2018       | III | B1931008         | B-NHL                | Inotuzumab Ozogamicin (PF-5208773)  | Calicheamicin | CD22 | Rituximab plus bendamustin<br>Rituximab plus gemcitabine | 164 | 148 (90) | 102 (62) | 167 | 146 (87) | 107 (64) | (27) |
| Eichenauer, 2017 | II  | Targeted BEACOPP | Classical HL         | Brentuximab Vedotin (SGN-35)        | MMAE          | CD30 | BrECADD                                                  | 50  | NA       | NA       | 52  | NA       | NA       | (35) |
| Horwitz, 2019    | III | ECHELON-2        | TCL                  | Brentuximab Vedotin (SGN-35)        | MMAE          | CD30 | CHOP                                                     | 223 | NA       | NA       | 226 | NA       | NA       | (55) |
| Hurvitz, 2013    | II  | BO21976          | Breast cancer        | Trastuzumab Emtansine (T-DM1)       | DM1           | HER2 | Trastuzumab plus docetaxel                               | 69  | NA       | 32 (46)  | 66  | NA       | 60 (91)  | (57) |
| Johnson, 2021    | III | MERU             | Extensive-Stage SCLC | Rovalpituzumab Tesirine (SC16LD6.5) | PBD           | DLL3 | Placebo                                                  | 368 | 290 (79) | NA       | 373 | 145 (39) | NA       | (63) |

|                      |     |                  |                      |                                     |               |             |                                 |     |          |          |     |          |          |       |
|----------------------|-----|------------------|----------------------|-------------------------------------|---------------|-------------|---------------------------------|-----|----------|----------|-----|----------|----------|-------|
| Kantarjian, 2019     | III | INO-VATE         | ALL                  | Inotuzumab Ozogamicin (PF-5208773)  | Calicheamicin | CD22        | Chemotherapy                    | 164 | 144 (88) | 115 (70) | 143 | 130 (91) | 114 (80) | (66)  |
| Kim, 2017            | III | ALCANZA          | TCL                  | Brentuximab Vedotin (SGN-35)        | MMAE          | CD30        | Methotrexate or bexarotene      | 66  | 57 (86)  | 19 (29)  | 62  | 44 (71)  | 18 (29)  | (71)  |
| Kindler, 2022        | II  | 15743            | Pleural mesothelioma | Anetumab Ravnansine (BAY94-9343)    | DM4           | Mesothelin  | Vinorelbine                     | 163 | NA       | 78 (48)  | 72  | NA       | 53 (74)  | (73)  |
| Kollmansberger, 2021 | II  | AGS-16C3F-15-3   | RCC                  | AGS-16C3F                           | MMAF          | ENPP3       | Axitinib                        | 67  | 53 (79)  | 17 (26)  | 66  | 61 (92)  | 30 (45)  | (75)  |
| Krop, 2017           | III | TH3RESA          | Breast cancer        | Trastuzumab Emtansine (T-DM1)       | DM1           | HER2        | Treatment of physician's choice | 403 | NA       | NA       | 184 | NA       | NA       | (80)  |
| Modi, 2022           | III | DESTINY-Breast04 | Breast cancer        | Trastuzumab Deruxtecan (T-DXd)      | DXd           | HER2        | Treatment of physician's choice | 371 | 369 (99) | 195 (53) | 172 | 169 (98) | 116 (67) | (96)  |
| Moore, 2021          | III | FORWARD I        | Ovarian cancer       | Mirvetuximab Soravtansine (IMGN853) | DM4           | FR $\alpha$ | Chemotherapy                    | 243 | 230 (95) | 61 (25)  | 109 | 98 (90)  | 48 (44)  | (99)  |
| Morschhäuser,        | II  | ROMULUS          | DLBCL                | Polatuzumab Vedotin                 | MMAE          | CD79b       | Pinatuzumab vedotin             | 39  | NA       | NA       | 42  | NA       | NA       | (100) |

|                    |       |                   |                      |                                   |      |       |                                    |            |                      |                      |     |          |          |       |
|--------------------|-------|-------------------|----------------------|-----------------------------------|------|-------|------------------------------------|------------|----------------------|----------------------|-----|----------|----------|-------|
| 2019               |       |                   |                      |                                   |      |       | plus<br>Rituximab                  |            |                      |                      |     |          |          |       |
| Morschhauser, 2019 | II    | ROMULUS           | Follicular lymphoma  | Polatuzumab Vedotin               | MMAE | CD79b | Pinatuzumab vedotin plus rituximab | 20         | NA                   | NA                   | 21  | NA       | NA       | (102) |
| Perez, 2017        | III   | MARIANNE          | Breast cancer        | Trastuzumab Emtansine (T-DM1)     | DM1  | HER2  | Trastuzumab plus taxane            | 361<br>366 | 357 (99)<br>361 (98) | 164 (45)<br>169 (46) | 353 | 348 (99) | 191 (54) | (116) |
| Sehn, 2020         | Ib/II | GO29365           | DLBCL                | Polatuzumab Vedotin               | MMAE | CD79b | Bendamustine plus rituximab        | 39         | NA                   | NA                   | 39  | NA       | NA       | (128) |
| Shitara, 2020      | II    | DESTINY-Gastric01 | Gastric cancer       | Trastuzumab Deruxtecan (T-DXd)    | DXd  | HER2  | Physician's choice of chemotherapy | 125        | 122 (98)             | 94 (75)              | 62  | 56 (90)  | 27 (44)  | (169) |
| Socinski, 2017     | I/II  | Immunogen 0007    | Extensive-stage SCLC | Lorvotuzumab Mertansine (IMGN901) | DM1  | CD56  | EC                                 | 94         | 90 (96)              | 83 (88)              | 47  | 39 (83)  | 33 (70)  | (137) |
| Straus, 2021       | III   | ECHELON-1         | Classical HL         | Brentuximab Vedotin (SGN-35)      | MMAE | CD30  | ABVD                               | 662        | 641 (97)             | 549 (83)             | 659 | 617 (94) | 389 (59) | (142) |
| Thungappan, 2021   | III   | CTRI/2018/0       | Breast cancer        | Trastuzumab Emtansine             | DM1  | HER2  | Trastuzumab emtansine              | 113        | NA                   | NA                   | 55  | NA       | NA       | (150) |

|                            |     |                |                  |                                          |      |           |                                               |          |          |          |     |          |          |       |
|----------------------------|-----|----------------|------------------|------------------------------------------|------|-----------|-----------------------------------------------|----------|----------|----------|-----|----------|----------|-------|
|                            |     | 7/0148<br>81   |                  | (ZRC-3256)                               |      |           |                                               |          |          |          |     |          |          |       |
| Tilly,<br>2022             | III | POLA<br>RIX    | DLBC<br>L        | Polatuzumab<br>Vedotin                   | MMAE | CD79b     | Rituximab<br>plus CHOP                        | 435      | 426 (98) | 264 (61) | 438 | 431 (98) | 262 (60) | (151) |
| Vahdat,<br>2021            | Iib | METR<br>IC     | TNBC             | Glembatumu<br>mab Vedotin<br>(CDX-011)   | MMAE | gpNM<br>B | Capecitabin<br>e                              | 213      | 211 (99) | 150 (70) | 92  | 92 (100) | 52 (57)  | (157) |
| Van Den<br>Bent,<br>2020   | II  | EORT<br>C 1410 | Gliobla<br>stoma | Depatuxizum<br>ab Mafodotin<br>(ABT-414) | MMAF | EGFR      | Lomustine<br>or<br>temozolomi<br>de           | 84<br>88 | NA       | NA       | 77  | NA       | NA       | (158) |
| Verma,<br>2012             | III | EMILI<br>A     | Breast<br>cancer | Trastuzumab<br>Emtansine<br>(T-DM1)      | DM1  | HER2      | Lapatinib<br>plus<br>capecitabine             | 490      | 470 (96) | 200 (41) | 488 | 477 (98) | 278 (57) | (159) |
| Von<br>Minckwi<br>tz, 2019 | III | KATH<br>ERINE  | Breast<br>cancer | Trastuzumab<br>Emtansine<br>(T-DM1)      | DM1  | HER2      | Trastuzumab                                   | 740      | 731 (99) | 190 (26) | 720 | 672 (93) | 111 (15) | (161) |
| Yardley,<br>2015           | II  | EMER<br>GE     | Breast<br>cancer | Glembatumu<br>mab Vedotin<br>(CDX-011)   | MMAE | gpNM<br>B | Investigator'<br>s choice<br>chemotherap<br>y | 96       | 87 (91)  | 39 (40)  | 41  | 37 (90)  | 16 (36)  | (164) |

Abbreviation: ID, Identification; ADC, antibody-drug conjugate; AEs, Adverse Events; TNBC, Triple-Negative Breast Cancer; SCLC, small cell lung cancer; NHL, non-Hodgkin lymphoma; HL, Hodgkin's lymphoma; BrECADD, brentuximab vedotin+etoposide+cyclophosphamid+doxorubicin+dexamethason+dacarbazine; CHOP, cyclophosphamide+doxorubicin+vincristine+prednisone; EC, cisplatin or carboplatin combined with etoposide; ABVD, doxorubicin+bleomycin+vinblastine+dacarbazine

**eTable 4. Risk of bias of each randomized controlled trial included for comparison.**

| <b>Study</b>          | <b>Randomization</b> | <b>Allocation concealment</b> | <b>Blinding of participants and personnel</b> | <b>Blinding of outcome assessment</b> | <b>Incomplete outcome data</b> | <b>Selecting report</b> | <b>Other sources of bias</b> |
|-----------------------|----------------------|-------------------------------|-----------------------------------------------|---------------------------------------|--------------------------------|-------------------------|------------------------------|
| Banerjee, 2018        | unclear              | unclear                       | high                                          | unclear                               | low                            | low                     | low                          |
| Bardia, 2021          | unclear              | unclear                       | high                                          | low                                   | low                            | low                     | low                          |
| Blackhall, 2021       | unclear              | unclear                       | high                                          | unclear                               | low                            | low                     | low                          |
| Cortes, 2022          | unclear              | unclear                       | high                                          | low                                   | low                            | low                     | low                          |
| Dang, 2018            | unclear              | unclear                       | high                                          | unclear                               | low                            | low                     | low                          |
| Eichenauer, 2017      | low                  | low                           | high                                          | low                                   | low                            | low                     | low                          |
| Horwitz, 2019         | low                  | low                           | low                                           | low                                   | low                            | low                     | low                          |
| Hurvitz, 2013         | low                  | low                           | high                                          | high                                  | low                            | low                     | low                          |
| Johnson, 2021         | unclear              | unclear                       | low                                           | low                                   | low                            | low                     | low                          |
| Kantarjian, 2019      | unclear              | unclear                       | high                                          | high                                  | low                            | low                     | low                          |
| Kim, 2017             | low                  | low                           | high                                          | low                                   | low                            | low                     | low                          |
| Kindler, 2022         | low                  | low                           | high                                          | low                                   | low                            | low                     | low                          |
| Kollmannsberger, 2021 | unclear              | unclear                       | high                                          | low                                   | low                            | low                     | low                          |
| Krop, 2017            | low                  | low                           | high                                          | high                                  | low                            | low                     | low                          |
| Modi, 2022            | low                  | low                           | high                                          | low                                   | low                            | low                     | low                          |
| Moore, 2021           | low                  | low                           | high                                          | low                                   | low                            | low                     | low                          |
| Morschhauser, 2019    | low                  | low                           | high                                          | high                                  | low                            | low                     | low                          |
| Perez, 2017           | low                  | low                           | high                                          | low                                   | low                            | low                     | low                          |
| Sehn, 2020            | unclear              | unclear                       | high                                          | low                                   | low                            | low                     | low                          |
| Shitara, 2020         | unclear              | unclear                       | high                                          | low                                   | low                            | low                     | low                          |

|                     |         |         |      |         |     |     |     |
|---------------------|---------|---------|------|---------|-----|-----|-----|
| Socinski, 2017      | unclear | unclear | high | unclear | low | low | low |
| Straus,2021         | low     | low     | high | low     | low | low | low |
| Thungappa, 2021     | low     | low     | high | low     | low | low | low |
| Tilly, 2022         | low     | low     | low  | low     | low | low | low |
| Vahdat, 2021        | low     | low     | high | low     | low | low | low |
| Van Den Bent, 2020  | low     | low     | high | low     | low | low | low |
| Verma, 2012         | low     | low     | high | low     | low | low | low |
| Von Minckwitz, 2019 | low     | low     | high | low     | low | low | low |
| Yardley, 2015       | unclear | unclear | high | low     | low | low | low |

---

Low indicates no risk, high indicates high risk and unclear indicates unknown risk.



**eTable 5. Patients with adverse events leading to treatment discontinuation.**

| <b>Cause of discontinuationa</b>         | <b>ADC therapy/No. (%)<br/>(N, 1,113)</b> |
|------------------------------------------|-------------------------------------------|
| <b>Neurologic</b>                        |                                           |
| Peripheral sensory neuropathy            | 161 (14.5)                                |
| Peripheral neuropathy                    | 122 (11.0)                                |
| Peripheral motor neuropathy              | 18 (1.6)                                  |
| Hypoesthesia                             | 12 (1.1)                                  |
| Peripheral sensorimotor neuropathy       | 5 (0.5)                                   |
| Hypoxic ischemic encephalopathy          | 2 (0.2)                                   |
| Gait disturbance                         | 2 (0.2)                                   |
| Dizziness                                | 2 (0.2)                                   |
| Hypersensitivity                         | 2 (0.2)                                   |
| Cerebral ischemia                        | 1 (0.1)                                   |
| Brain edema                              | 1 (0.1)                                   |
| Vertigo                                  | 1 (0.1)                                   |
| Memory impairment                        | 1 (0.1)                                   |
| Confusional state                        | 1 (0.1)                                   |
| <b>Hematologic</b>                       |                                           |
| Thrombocytopenia                         | 125 (11.2)                                |
| Neutropenia                              | 47 (4.2)                                  |
| Increased gamma-glutamyl transferase     | 30 (2.7)                                  |
| Increased blood bilirubin                | 29 (2.6)                                  |
| Increased aspartate transaminase         | 25 (2.3)                                  |
| Increased alanine aminotransferas        | 18 (1.6)                                  |
| Febrile neutropenia                      | 14 (1.3)                                  |
| Neutrophil count decrease                | 5 (0.5)                                   |
| Hypoalbuminemia                          | 4 (0.4)                                   |
| Anemia                                   | 3 (0.3)                                   |
| Increased blood creatinine phosphokinase | 2 (0.2)                                   |
| Alkaline Phosphatase Increased           | 1 (0.1)                                   |
| Lipase increase                          | 1 (0.1)                                   |
| Troponin increased                       | 1 (0.1)                                   |
| <b>Pulmonary</b>                         |                                           |
| Pneumonitis                              | 64 (5.8)                                  |
| Interstitial lung disease                | 39 (3.5)                                  |
| Pleural effusion                         | 22 (2.0)                                  |
| Pneumonia                                | 7 (0.6)                                   |
| Dyspnoea                                 | 6 (0.5)                                   |
| Hypoxia                                  | 2 (0.2)                                   |
| Respiratory failure                      | 2 (0.2)                                   |
| Pneumothorax                             | 1 (0.1)                                   |
| Acute respiratory distress syndrome      | 1 (0.1)                                   |

|                                              |          |
|----------------------------------------------|----------|
| Upper respiratory tract infection            | 1 (0.1)  |
| Bronchopneumonia                             | 1 (0.1)  |
| Hemoptysis                                   | 1 (0.1)  |
| Aspiration reaction                          | 1 (0.1)  |
| Respiratory tract hemorrhage                 | 1 (0.1)  |
| Pneumocystis jiroveci pneumonia              | 1 (0.1)  |
| Cough                                        | 1 (0.1)  |
| Other                                        | 4 (0.4)  |
| <b>Cardiovascular</b>                        |          |
| Decreased left-ventricular ejection fraction | 12 (1.1) |
| Pericardial effusion                         | 6 (0.5)  |
| Hypotension                                  | 2 (0.2)  |
| Sinus tachycardia                            | 2 (0.2)  |
| Coronary artery disease                      | 1 (0.1)  |
| Pericarditis                                 | 1 (0.1)  |
| QT prolonged                                 | 1 (0.1)  |
| Paroxysmal atrial tachycardia                | 1 (0.1)  |
| Atrial fibrillation anaemia                  | 1 (0.1)  |
| Cardiac arrest                               | 1 (0.1)  |
| <b>Renal</b>                                 |          |
| Proteinuria                                  | 6 (0.5)  |
| Acute kidney injury                          | 4 (0.4)  |
| Renal failure                                | 2 (0.2)  |
| Worsening chronic renal disease              | 1 (0.1)  |
| <b>Gastrointestinal</b>                      |          |
| Hepatotoxicity                               | 12 (1.1) |
| Gastrointestinal hemorrhage                  | 6 (0.5)  |
| Nausea                                       | 5 (0.5)  |
| Abdominal pain                               | 4 (0.4)  |
| Vomiting                                     | 3 (0.3)  |
| Diarrhea                                     | 2 (0.2)  |
| Small intestinal obstruction                 | 2 (0.2)  |
| Ascites                                      | 2 (0.2)  |
| Immune-mediated hepatitis                    | 2 (0.2)  |
| Hypoalbuminemia                              | 1 (0.1)  |
| Hyperbilirubinemia                           | 1 (0.1)  |
| Bile duct obstruction                        | 1 (0.1)  |
| <b>Musculoskeletal</b>                       |          |
| Myalgia                                      | 2 (0.2)  |
| Muscular weakness                            | 2 (0.2)  |
| Muscle spasms                                | 1 (0.1)  |
| Arthralgia                                   | 1 (0.1)  |
| Hip fracture                                 | 1 (0.1)  |
| Joint crepitation                            | 1 (0.1)  |

**Metabolism and nutrition**

|                    |         |
|--------------------|---------|
| Decreased appetite | 8 (0.7) |
| Dehydration        | 4 (0.4) |
| Hypophosphatemia   | 2 (0.2) |
| Hypercalcemia      | 2 (0.2) |
| Hypomagnesemia     | 1 (0.1) |
| Failure to thrive  | 1 (0.1) |

**Constitutional**

|                               |          |
|-------------------------------|----------|
| Fatigue                       | 17 (1.5) |
| Asthenia                      | 4 (0.4)  |
| Pyrexia                       | 3 (0.3)  |
| Disturbance                   | 2 (0.2)  |
| Malaise                       | 2 (0.2)  |
| Physical health deterioration | 1 (0.1)  |
| Fluid retention               | 1 (0.1)  |
| Metabolic acidosis            | 1 (0.1)  |
| Malnutrition                  | 1 (0.1)  |

**Oedema**

|                   |         |
|-------------------|---------|
| Peripheral oedema | 8 (0.7) |
| Localised oedema  | 5 (0.5) |
| Face oedema       | 2 (0.2) |

**Ocular**

|                               |          |
|-------------------------------|----------|
| Corneal deposits              | 12 (1.1) |
| Keratitis                     | 9 (0.8)  |
| Vision blurred                | 7 (0.6)  |
| Corneal epithelial microcysts | 6 (0.5)  |
| Reduced visual acuity         | 3 (0.3)  |
| Ulcerative keratitis          | 2 (0.2)  |
| Corneal scar                  | 2 (0.2)  |
| Visual distortions            | 1 (0.1)  |
| Limbal stem cell deficiency   | 1 (0.1)  |
| Photophobia                   | 1 (0.1)  |
| Blepharitis                   | 1 (0.1)  |
| Conjunctivitis                | 1 (0.1)  |
| Entropion                     | 1 (0.1)  |
| Erythema                      | 1 (0.1)  |
| Trichiasis                    | 1 (0.1)  |
| Cataract                      | 1 (0.1)  |
| Other                         | 37 (3.3) |

**Dermatologic**

|                     |          |
|---------------------|----------|
| Rash                | 22 (2.0) |
| Dermatologic bullae | 2 (0.2)  |
| Hyperpigmentation   | 2 (0.2)  |
| Mucositis           | 1 (0.1)  |

|                                       |          |
|---------------------------------------|----------|
| Lichenoid keratosis                   | 1 (0.1)  |
| Pruritus                              | 1 (0.1)  |
| Urticaria                             | 1 (0.1)  |
| Herpes zoster                         | 1 (0.1)  |
| <b>Infectious</b>                     |          |
| Sepsis                                | 18 (1.6) |
| Septic shock                          | 3 (0.3)  |
| Urosepsis                             | 1 (0.1)  |
| Neutropenic sepsis                    | 1 (0.1)  |
| Fungal infection                      | 1 (0.1)  |
| <b>Other</b>                          |          |
| Stomatitis                            | 4 (0.4)  |
| Infusion reaction                     | 2 (0.2)  |
| Paraesthesia                          | 2 (0.2)  |
| Tumor lysis syndrome                  | 2 (0.2)  |
| Decreased DLCO                        | 2 (0.2)  |
| Tumour haemorrhage                    | 1 (0.1)  |
| Capillary leak syndrome               | 1 (0.1)  |
| Glucose intolerance                   | 1 (0.1)  |
| Anal Fistula                          | 1 (0.1)  |
| Back pain                             | 1 (0.1)  |
| Pleuritic pain                        | 1 (0.1)  |
| Influenza                             | 1 (0.1)  |
| Graft-versus-host disease reactivatio | 1 (0.1)  |
| Drug specific antibody titre present  | 1 (0.1)  |
| Clear cell renal cell carcinoma       | 1 (0.1)  |
| Erythroleukemia                       | 1 (0.1)  |
| Radiation necrosis                    | 1 (0.1)  |
| Multiple organ dysfunction syndrome   | 1 (0.1)  |

<sup>a</sup> Unknown were not included (1030 cases).

Abbreviation: DLCO, diffusing capacity of the lung for carbon monoxide.

eTable 6. Incidences of grade 3 or higher adverse events in main payload-conjugates ADCs (N≥200).

| Endpoint                          | MMAE<br>(%, 95% CI) | DM1<br>(%, 95% CI) | DXd<br>(%, 95% CI) | PBD<br>(%, 95% CI) | SN-38<br>(%, 95% CI) | DM4<br>(%, 95% CI) | Calicheamicin<br>(%, 95% CI) | MMAF<br>(%, 95% CI) |
|-----------------------------------|---------------------|--------------------|--------------------|--------------------|----------------------|--------------------|------------------------------|---------------------|
| <b>Hematologic</b>                |                     |                    |                    |                    |                      |                    |                              |                     |
| Neutropenia                       | 37.0 (34.9, 39.2)   | 29.9 (25.1, 34.8)  | 18.8 (14.7, 22.8)  | 15.7 (9.2, 22.2)   | 42.8 (39.9, 45.7)    | 23.9 (16.2, 31.7)  | 13.7 (10.2, 17.2)            | -                   |
| Thrombocytopenia                  | 28.8 (16.5, 41.2)   | 22.2 (19.7, 24.6)  | -                  | 14.4 (11.3, 17.5)  | 24.4 (17.8, 31.0)    | 22.6 (13.7, 31.6)  | 56.0 (42.2, 69.8)            | 12.9 (7.4, 18.5)    |
| Lymphopenia                       | 22.6 (11.4, 33.9)   | 27.3 (12.1, 42.5)  | -                  | -                  | 11.6 (6.7, 16.5)     | 36.5 (23.5, 49.6)  | -                            | -                   |
| Febrile neutropenia               | 17.1 (14.9, 19.4)   | -                  | -                  | 25.7 (11.2, 40.2)  | 12.3 (8.4, 16.1)     | -                  | -                            | -                   |
| Anemia                            | 15.3 (12.2, 18.4)   | 19.7 (12.8, 26.6)  | 9.9 (3.8, 16.0)    | 12.8 (5.7, 19.8)   | 11.3 (9.1, 13.4)     | -                  | -                            | -                   |
| WBC count decreased               | 11.2 (8.1, 14.4)    | 15.2 (2.9, 27.4)   | -                  | -                  | 13.8 (10.9, 16.8)    | -                  | -                            | -                   |
| <b>Gastrointestinal</b>           |                     |                    |                    |                    |                      |                    |                              |                     |
| Nausea                            | 27.5 (18.3, 36.6)   | 22.2 (6.5, 37.9)   | -                  | -                  | 10.1 (5.1, 15.2)     | -                  | -                            | -                   |
| Decreased appetite                | 24.3 (10.5, 38.1)   | 11.1 (0.7, 23.0)   | -                  | -                  | -                    | -                  | -                            | -                   |
| <b>Neurologic</b>                 |                     |                    |                    |                    |                      |                    |                              |                     |
| Peripheral neuropathy             | 10.0 (-0.7, 20.7)   | -                  | -                  | -                  | -                    | -                  | -                            | -                   |
| <b>Hepatorenal</b>                |                     |                    |                    |                    |                      |                    |                              |                     |
| AST increased                     | 17.5 (10.8, 24.1)   | 13.7 (5.8, 21.6)   | -                  | 18.4 (9.7, 27.1)   | -                    | -                  | -                            | -                   |
| ALT increased                     | 15.9 (9.5, 22.3)    | -                  | -                  | 14.9 (4.7, 25.1)   | -                    | -                  | -                            | -                   |
| GGT increased                     | - <sup>a</sup>      | -                  | -                  | 16.2 (7.4, 24.9)   | -                    | -                  | -                            | -                   |
| Hypoalbuminemia                   | -                   | -                  | -                  | 13.8 (1.2, 26.3)   | -                    | -                  | -                            | -                   |
| Liver function test abnormalities | -                   | 18.2 (-4.6, 41.0)  | -                  | -                  | -                    | -                  | -                            | -                   |
| <b>Ocular toxicities</b>          |                     |                    |                    |                    |                      |                    |                              |                     |
| Keratitis                         | 13.3 (4.7, 21.9)    | -                  | -                  | -                  | -                    | -                  | -                            | -                   |

**Pulmonary**

|           |                  |   |   |   |   |   |   |   |
|-----------|------------------|---|---|---|---|---|---|---|
| Pneumonia | 6.3 (-2.1, 14.6) | - | - | - | - | - | - | - |
|-----------|------------------|---|---|---|---|---|---|---|

**Constitutional**

|         |                  |                  |   |   |                   |   |   |   |
|---------|------------------|------------------|---|---|-------------------|---|---|---|
| Fatigue | 15.9 (6.8, 24.9) | 16.0 (5.8, 26.2) | - | - | 12.0 (-0.7, 24.7) | - | - | - |
|---------|------------------|------------------|---|---|-------------------|---|---|---|

|             |                  |    |   |   |   |   |   |   |
|-------------|------------------|----|---|---|---|---|---|---|
| Hypokalemia | 10.8 (0.8, 20.8) | NA | - | - | - | - | - | - |
|-------------|------------------|----|---|---|---|---|---|---|

|                  |                  |    |   |                  |   |   |   |   |
|------------------|------------------|----|---|------------------|---|---|---|---|
| Hypophosphatemia | 8.7 (-2.8, 20.2) | NA | - | 11.4 (0.9, 22.0) | - | - | - | - |
|------------------|------------------|----|---|------------------|---|---|---|---|

|             |   |   |   |   |   |   |   |   |
|-------------|---|---|---|---|---|---|---|---|
| Dehydration | - | - | - | - | - | - | - | - |
|-------------|---|---|---|---|---|---|---|---|

**Skin**

|      |   |   |   |   |   |                   |   |   |
|------|---|---|---|---|---|-------------------|---|---|
| Rash | - | - | - | - | - | 21.4 (13.9, 28.8) | - | - |
|------|---|---|---|---|---|-------------------|---|---|

|                                   |   |   |   |                  |   |   |   |   |
|-----------------------------------|---|---|---|------------------|---|---|---|---|
| Skin reactions and nail disorders | - | - | - | 19.1 (7.9, 30.4) | - | - | - | - |
|-----------------------------------|---|---|---|------------------|---|---|---|---|

|              |   |   |   |   |   |                  |   |   |
|--------------|---|---|---|---|---|------------------|---|---|
| Hypertension | - | - | - | - | - | 13.6 (5.4, 21.9) | - | - |
|--------------|---|---|---|---|---|------------------|---|---|

<sup>a</sup> Unreported.

Abbreviation: WBC, white blood cell; AST, aspartate transaminase; ALT, alanine aminotransferase; GGT, gamma-glutamyl transferase.

eTable 7. Incidences of grade 3 or higher adverse events in main anti-target monoclonal antibody ADCs (N≥200).

| Endpoint <sup>a</sup>   | Anti-HER2<br>(%, 95% CI) | Anti-DLL3<br>(%, 95% CI) | Anti-CD30<br>(%, 95% CI) | Anti-Trop-2<br>(%, 95% CI) | Anti-CD79b<br>(%, 95% CI) | Anti-CD22<br>(%, 95% CI) | Anti-Nectin-4<br>(%, 95% CI) | Anti-gpNMB<br>(%, 95% CI) | Anti-FR $\alpha$<br>(%, 95% CI) | Anti-CD19<br>(%, 95% CI) | Anti-CD56<br>(%, 95% CI) |
|-------------------------|--------------------------|--------------------------|--------------------------|----------------------------|---------------------------|--------------------------|------------------------------|---------------------------|---------------------------------|--------------------------|--------------------------|
| <b>Hematologic</b>      |                          |                          |                          |                            |                           |                          |                              |                           |                                 |                          |                          |
| Neutropenia             | 18.7 (15.8, 21.5)        | 13.8 (1.2, 26.3)         | 61.5 (58.0, 65.0)        | 40.3 (37.0, 43.6)          | 28.3 (24.0, 32.5)         | -                        | -                            | -                         | 15.4 (8.8, 21.9)                | -                        | 43.4 (34.7, 51.9)        |
| Thrombocytopenia        | 23.2 (20.6, 25.8)        | 12.9 (9.9, 15.9)         | 23.1 (11.6, 34.5)        | 24.4 (17.8, 31.0)          | -                         | -                        | -                            | 24.6 (20.5, 28.7)         | 43.8 (26.6, 60.9)               | 9.6 (1.6, 17.6)          | 18.1 (11.4, 24.8)        |
| Anemia                  | 9.9 (3.8, 16.0)          | 10.3 (-0.7, 21.4)        | -                        | 11.3 (9.1, 13.4)           | 12.0 (8.9, 15.0)          | -                        | -                            | -                         | -                               | -                        | 19.7 (12.8, 26.6)        |
| WBC count decreased     | 14.4 (8.2, 20.6)         | -                        | -                        | 13.8 (10.9, 16.8)          | -                         | -                        | -                            | 9.4 (5.5, 13.3)           | -                               | -                        | 15.2 (2.9, 27.4)         |
| Febrile neutropenia     | - <sup>b</sup>           | -                        | 19.3 (16.3, 22.3)        | 12.3 (8.4, 16.1)           | 13.8 (10.6, 17.0)         | -                        | -                            | -                         | -                               | -                        | -                        |
| Lymphopenia             | -                        | -                        | -                        | 11.6 (6.7, 16.5)           | -                         | -                        | -                            | -                         | -                               | 36.5 (23.5, 49.6)        | 27.3 (12.1, 42.5)        |
| <b>Gastrointestinal</b> |                          |                          |                          |                            |                           |                          |                              |                           |                                 |                          |                          |
| Diarrhoea               | 22.2 (6.5, 37.9)         | -                        | -                        | 10.1 (5.1, 15.2)           | -                         | -                        | -                            | -                         | -                               | -                        | -                        |
| Nausea                  | 11.1 (-0.7, 23.0)        | -                        | -                        | -                          | -                         | 27.5 (18.3, 36.6)        | -                            | -                         | -                               | -                        | -                        |
| <b>Neurologic</b>       |                          |                          |                          |                            |                           |                          |                              |                           |                                 |                          |                          |
| Hypoesthesia            | 23.3 (10.6, 35.9)        | -                        | -                        | -                          | -                         | -                        | -                            | -                         | -                               | -                        | -                        |
| <b>Hepatorenal</b>      |                          |                          |                          |                            |                           |                          |                              |                           |                                 |                          |                          |
| AST increased           | 13.7 (7.0, 20.4)         | 13.8 (1.2, 26.3)         | -                        | -                          | -                         | -                        | 17.5 (10.8, 24.1)            | -                         | -                               | -                        | -                        |
| ALT increased           | -                        | -                        | -                        | -                          | -                         | -                        | 15.9 (9.5, 22.3)             | -                         | -                               | -                        | -                        |

|                                   |                   |                   |                  |   |   |                  |   |   |                  |   |   |
|-----------------------------------|-------------------|-------------------|------------------|---|---|------------------|---|---|------------------|---|---|
| Liver function test abnormalities | 18,2 (-4.6, 41.0) | -                 | -                | - | - | -                | - | - | -                | - | - |
| Hypoalbuminemia                   | -                 | 13.8 (1.2, 26.3)  | -                | - | - | -                | - | - | -                | - | - |
| <b>Pulmonary</b>                  |                   |                   |                  |   |   |                  |   |   |                  |   |   |
| Pleural effusion                  | -                 | 10.3 (-0.7, 21.4) | -                | - | - | -                | - | - | -                | - | - |
| <b>Constitutional</b>             |                   |                   |                  |   |   |                  |   |   |                  |   |   |
| Fatigue                           | 16.0 (5.8, 26.2)  | 7.7 (0.4, 14.9)   | 15.9 (6.8, 24.9) | - | - | -                | - | - | -                | - | - |
| Dehydration                       | 11.1 (-0.7, 23.0) | -                 | -                | - | - | -                | - | - | -                | - | - |
| <b>Other</b>                      |                   |                   |                  |   |   |                  |   |   |                  |   |   |
| Hypertension                      | -                 | -                 | -                | - | - | 13.6 (5.4, 21.9) | - | - | 13.6 (5.4, 21.9) | - | - |

<sup>a</sup> Grade 3 treatment-related adverse events not associated with anti-Mesothelin ADCs in the included studies (incidence > 10%).

<sup>b</sup> Unreported.

Abbreviation: WBC, white blood cell; AST, aspartate transaminase; ALT, alanine aminotransferase; GGT, gamma-glutamyl transferase



**eTable 8. Indirect comparison of RCTs.**

| Subgroup                  | All grades                  |                    | Grade 3 or higher        |                    |
|---------------------------|-----------------------------|--------------------|--------------------------|--------------------|
|                           | Odds ratio<br>[95% CI]      | <i>P</i> -value    | Odds ratio<br>[95% CI]   | <i>P</i> -value    |
| <b>ADC agent</b>          |                             |                    |                          |                    |
| AGS-16C3F                 | 0.31 [0.11, 0.92]           | 0.0346             | 0.41 [0.20, 0.85]        | 0.0166             |
| Trastuzumab Deruxtecan    | 0.61 [0.47, 0.79]           | 0.0003             | 0.80 [0.64, 0.99]        | 0.0374             |
| Polatuzumab Vedotin       | 0.77 [0.28, 2.08]           | 0.6051             | 1.04 [0.79, 1.36]        | 0.7923             |
| Glembatumumab Vedotin     | 0.84 [0.26, 2.69]           | 0.7689             | 1.51 [1.00, 2.27]        | 0.0504             |
| Inotuzumab Ozogamicin     | 1.00 [0.61, 1.64]           | 0.9975             | 0.78 [0.56, 1.10]        | 0.1629             |
| Trastuzumab Emtansine     | 1.26 [0.89, 1.77]           | 0.1894             | 0.93 [0.82, 1.06]        | 0.2813             |
| Mirvetuximab Soravtansine | 1.99 [0.86, 4.57]           | 0.1082             | 0.43 [0.27, 0.69]        | 0.0004             |
| Brentuximab Vedotin       | 2.11 [1.34, 3.31]           | 0.0012             | 2.74 [2.18, 3.44]        | < 0.0001           |
| Lorvotuzumab Mertansine   | 4.62 [1.31, 16.23]          | 0.0172             | <b>3.20 [1.32, 7.77]</b> | <b>0.0101</b>      |
| Rovalpituzumab Tesirine   | 5.85 [4.22, 8.09]           | < 0.0001           | NA                       | NA                 |
| Sacituzumab Govitecan     | <b>10.94 [4.59, 26.04]</b>  | <b>&lt; 0.0001</b> | 2.05 [1.42, 2.95]        | 0.0001             |
| Anetumab Ravtansine       | NA                          | NA                 | 0.33 [0.18, 0.60]        | 0.0003             |
| <b>Payload type</b>       |                             |                    |                          |                    |
| MMAF                      | 0.31 [0.11, 0.92]           | 0.0346             | 0.41 [0.20, 0.85]        | 0.0166             |
| DM1                       | 0.80 [0.69, 0.92]           | 0.0019             | 0.86 [0.76, 0.97]        | 0.0148             |
| Calicheamicin             | 1.00 [0.61, 1.64]           | 0.9975             | 0.78 [0.56, 1.10]        | 0.1629             |
| MMAE                      | 1.65 [1.14, 2.39]           | 0.0077             | 1.71 [1.46, 1.99]        | < 0.0001           |
| DM4                       | 1.99 [0.86, 4.59]           | 0.1082             | 0.41 [0.29, 0.59]        | < 0.0001           |
| PBD                       | 5.85 [4.22, 8.09]           | < 0.0001           | NA                       | NA                 |
| SN-38                     | 7.00 [2.87, 17.08]          | < 0.0001           | <b>2.05 [1.42, 2.95]</b> | <b>0.0001</b>      |
| DXd                       | <b>27.67 [12.00, 63.78]</b> | <b>&lt; 0.0001</b> | 1.50 [1.20, 1.89]        | 0.0005             |
| <b>Target agent</b>       |                             |                    |                          |                    |
| ENPP3                     | 0.31 [0.11, 0.92]           | 0.0346             | 0.41 [0.20, 0.85]        | 0.0166             |
| CD79b                     | 0.77 [0.28, 2.08]           | 0.6051             | 1.04 [0.79, 1.36]        | 0.7923             |
| gpNMB                     | 0.84 [0.26, 2.69]           | 0.7689             | 1.51 [1.00, 2.27]        | 0.0504             |
| CD22                      | 1.00 [0.61, 1.64]           | 0.9975             | 0.79 [0.56, 1.10]        | 0.1629             |
| FR $\alpha$               | 1.99 [0.86, 4.59]           | 0.1082             | 0.43 [0.27, 0.67]        | 0.0004             |
| CD30                      | 2.11 [1.35, 3.32]           | 0.0012             | <b>2.74 [2.18, 3.44]</b> | <b>&lt; 0.0001</b> |
| DLL3                      | 5.85 [4.22, 8.09]           | < 0.0001           | NA                       | NA                 |
| Trop-2                    | 7.00 [2.87, 17.08]          | < 0.0001           | 2.05 [1.42, 2.95]        | 0.0001             |
| HER2                      | <b>7.53 [5.92, 9.58]</b>    | <b>&lt; 0.0001</b> | 1.19 [1.07, 1.33]        | 0.0017             |
| Mesothelin                | NA                          | NA                 | 0.33 [0.18, 0.60]        | 0.0003             |

**eTable 9. Result of heterogeneity test.**

| Coefficients        | I <sup>2</sup> [95% CI] | <i>P</i> -value | Egger's test ( <i>P</i> ) |
|---------------------|-------------------------|-----------------|---------------------------|
| <b>ADC agent</b>    |                         |                 |                           |
| All-grade           | 95.9% [94.9%, 96.7%]    | <0.0001         | 0                         |
| Grade 3 or higher   | 96.3% [95.4%, 97.0%]    | <0.0001         | 0.452                     |
| <b>Payload type</b> |                         |                 |                           |
| All-grade           | 95.6% [94.0%, 96.7%]    | <0.0001         | 0.08                      |
| Grade 3 or higher   | 95.7% [94.1%, 96.8%]    | <0.0001         | 0.382                     |
| <b>Target agent</b> |                         |                 |                           |
| All-grade           | 95.3% [94.4%, 96.2%]    | <0.0001         | 0                         |
| Grade 3 or higher   | 94.8% [93.6%, 95.7%]    | <0.0001         | 0.13                      |
| <b>Cancer type</b>  |                         |                 |                           |
| All-grade           | 96.7% [95.4%, 97.6%]    | <0.001          | 0.01                      |
| Grade 3 or higher   | 97.0% [95.9%, 97.8%]    | <0.001          | 0.8                       |

**eFigure 1. Incidences of treatment-related adverse events leading to treatment discontinuation in each ADC.**

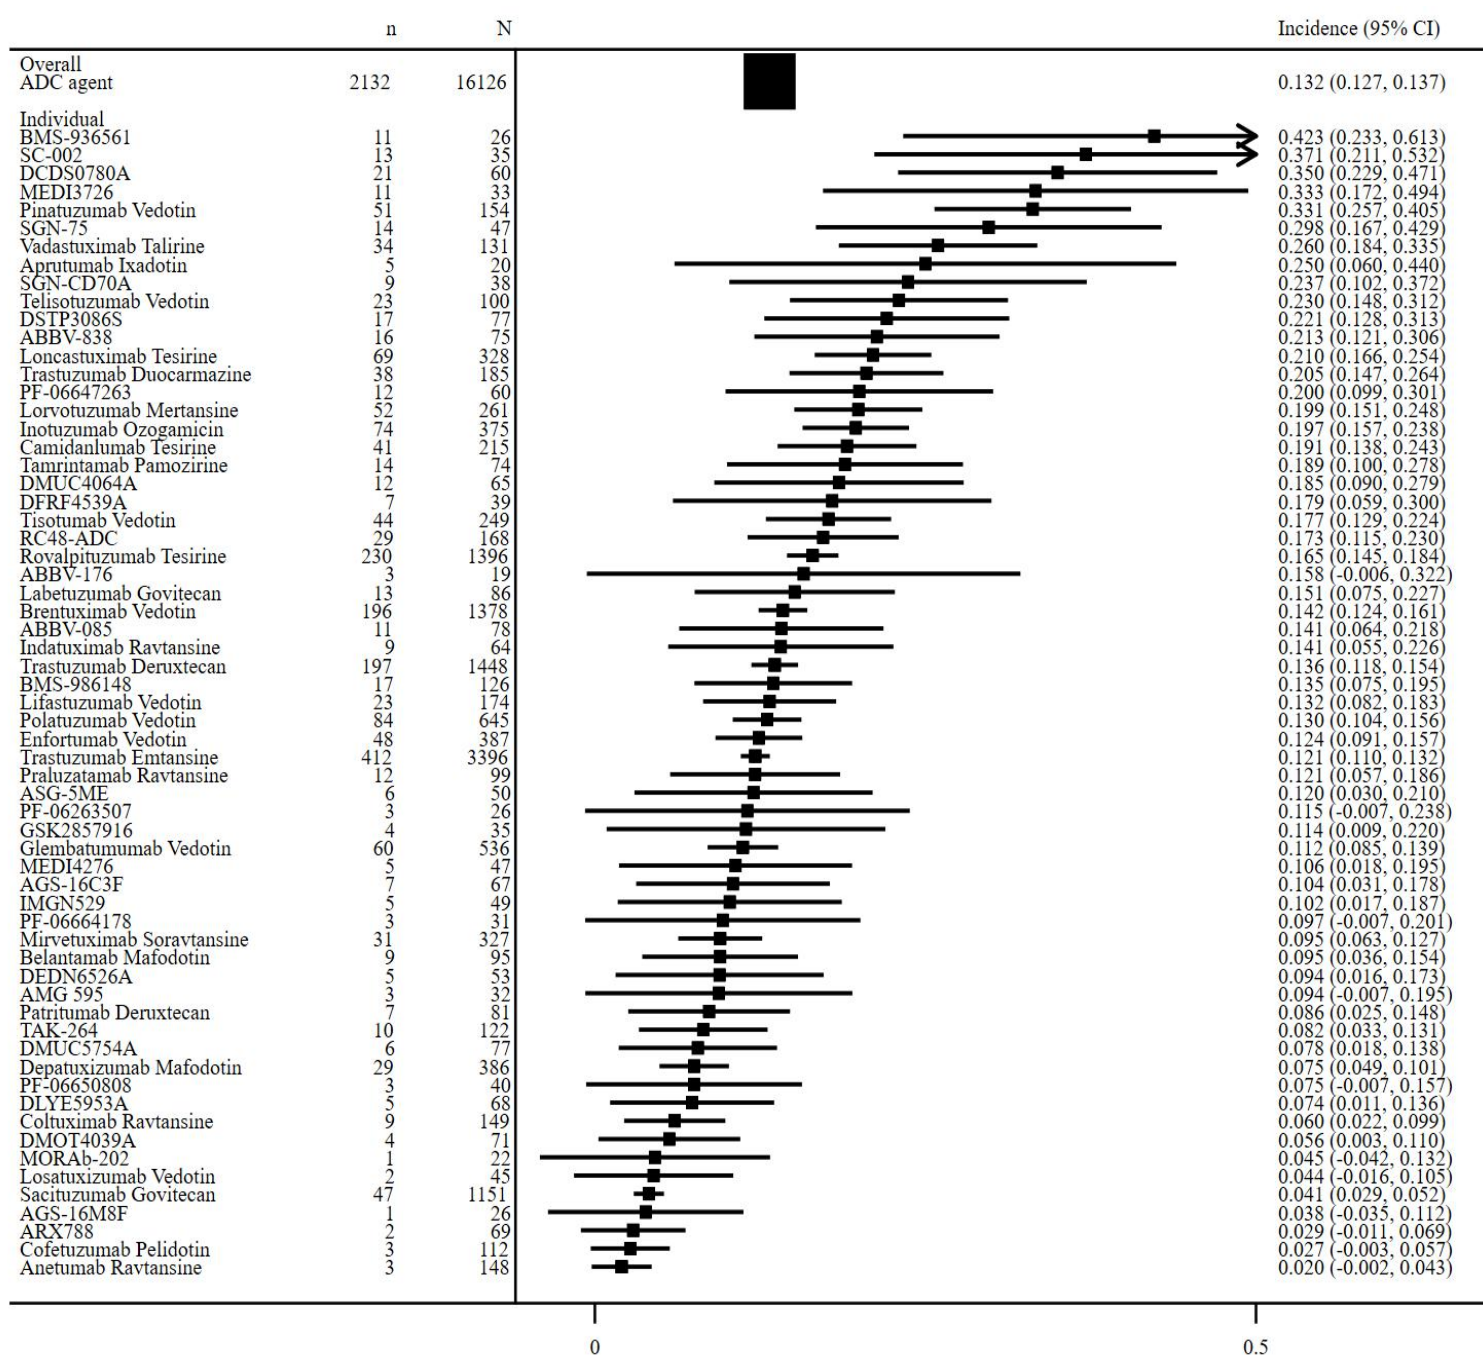

**eFigure 2. Incidences of treatment-related adverse events leading to treatment discontinuation in each payload and target-containing ADC.**

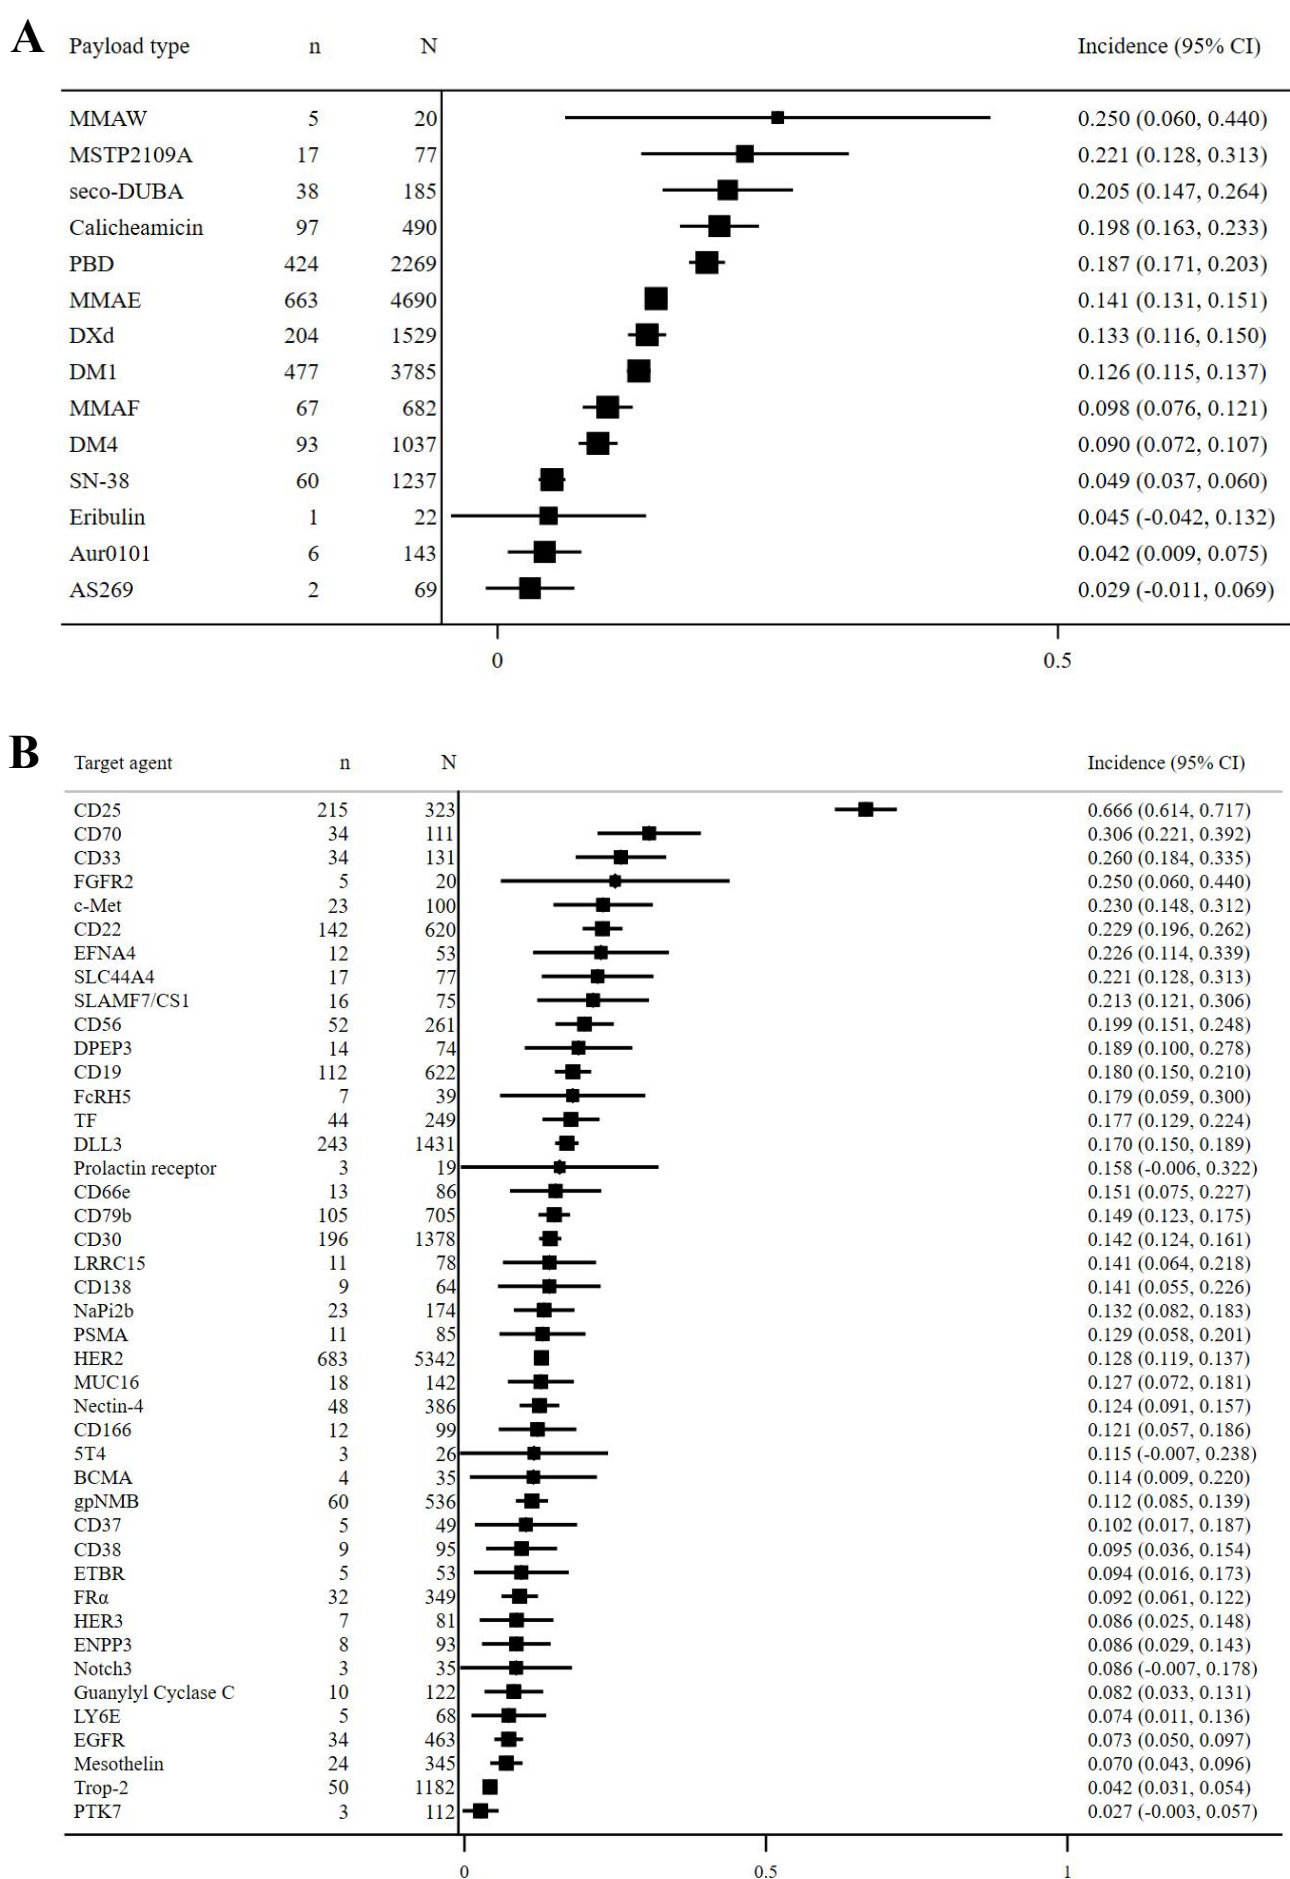

A, Incidences of treatment-related adverse events leading to treatment discontinuation in each payload-conjugates ADC. B, Incidences of treatment-related adverse events leading to treatment discontinuation in each anti-target monoclonal antibody ADC.

**eFigure 3. Incidences of treatment-related adverse events deaths in each ADC.**

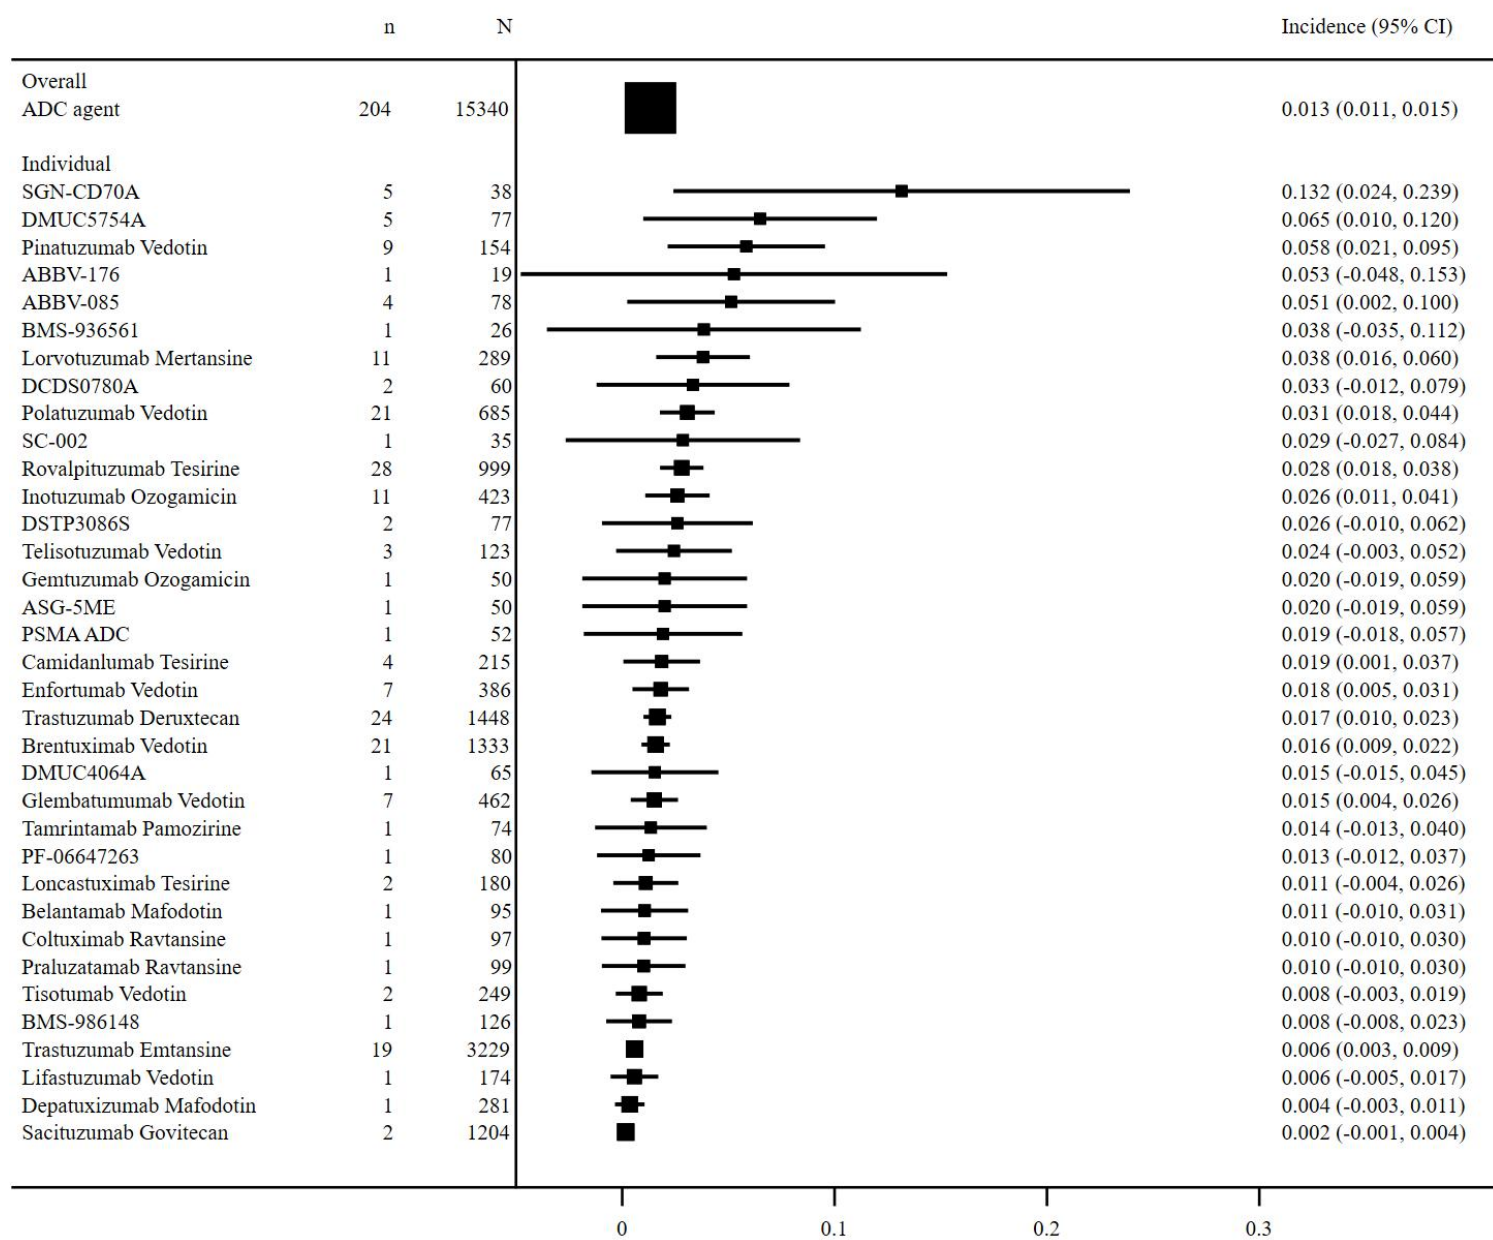

**eFigure 4. Subgroup analysis of overall adverse event incidence in each payload-conjugates ADC.**

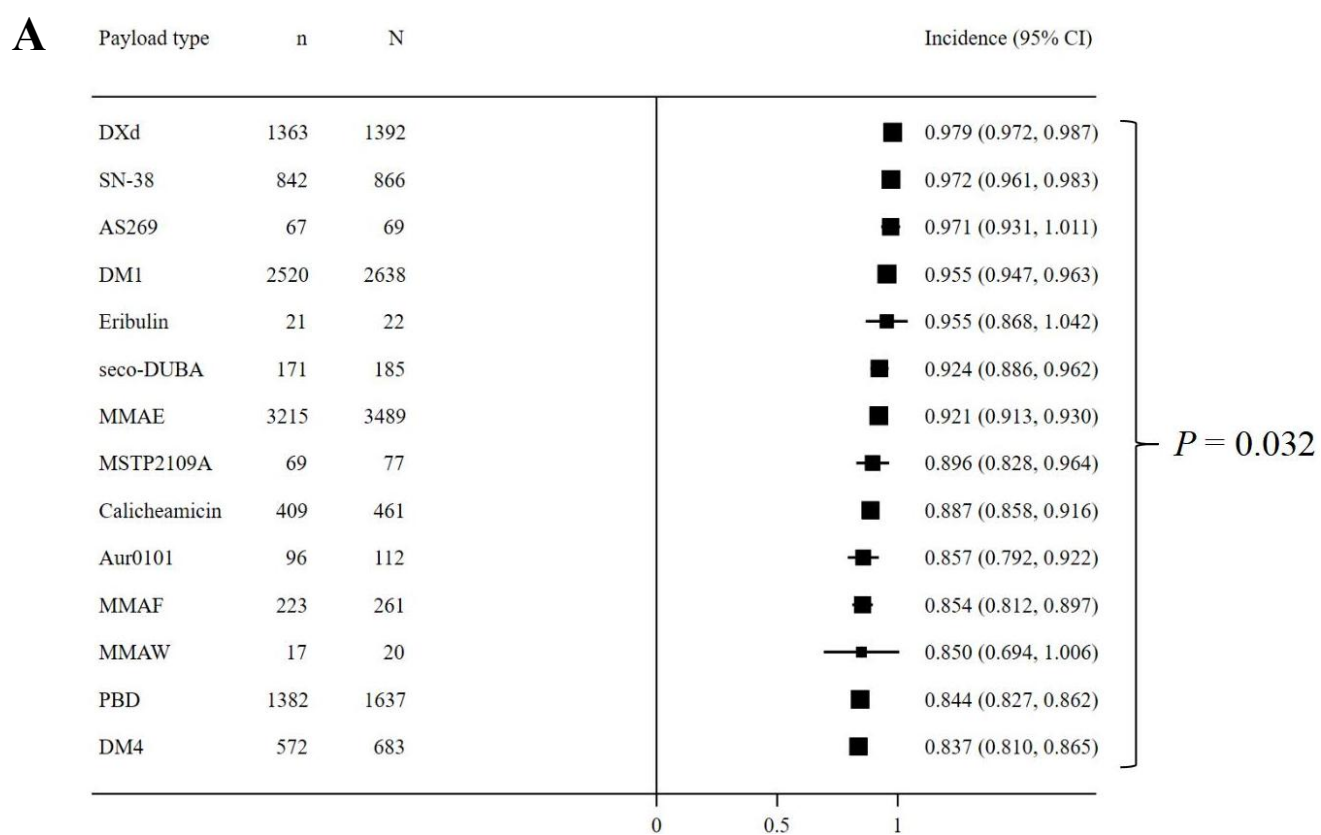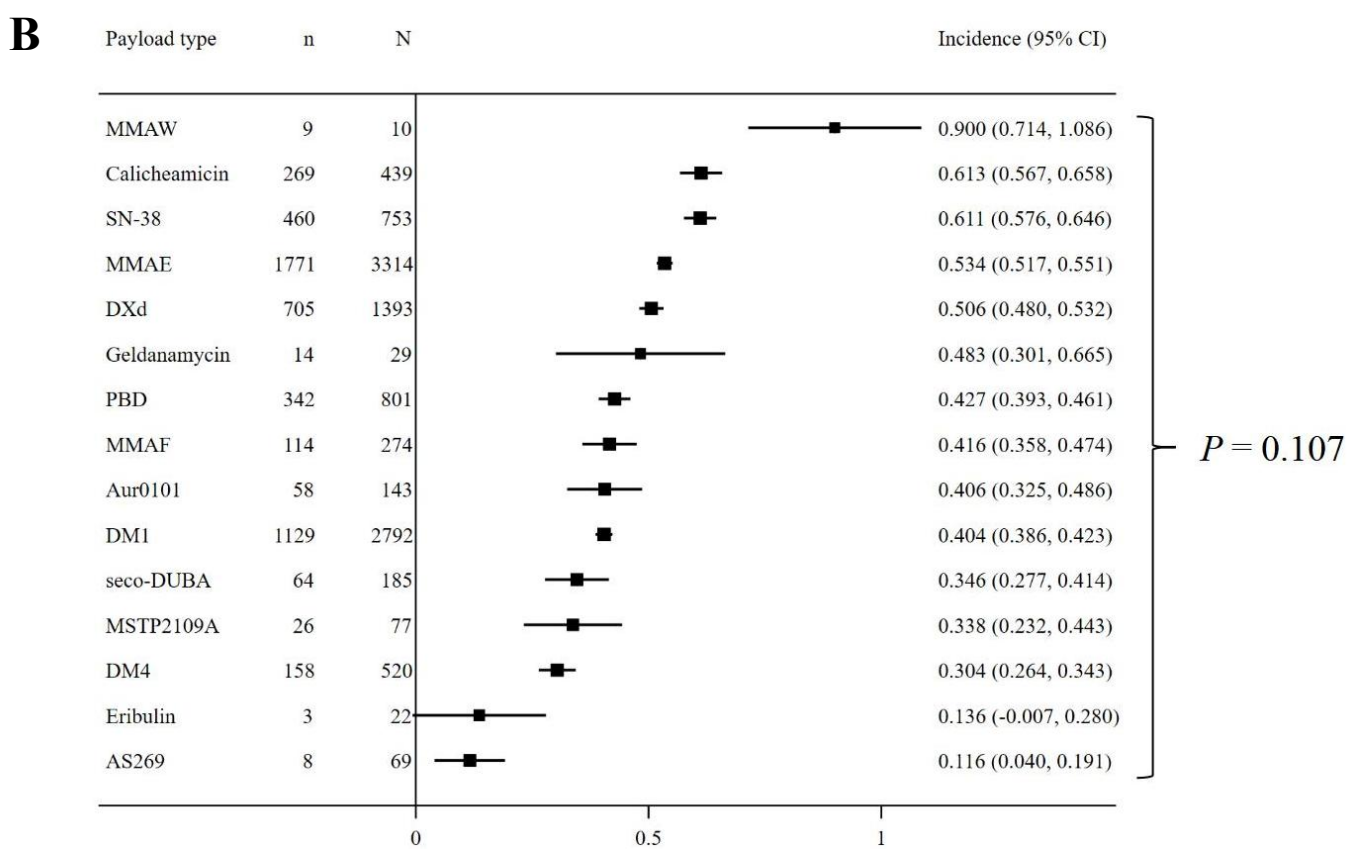

A, All-grade adverse event in each payload-conjugates ADC. B, Grade 3 or higher adverse event in each payload-conjugates ADC. *P*-value is Anova test result.

**eFigure 5. Subgroup analysis of overall adverse event incidence in each anti-target monoclonal antibody ADC.**

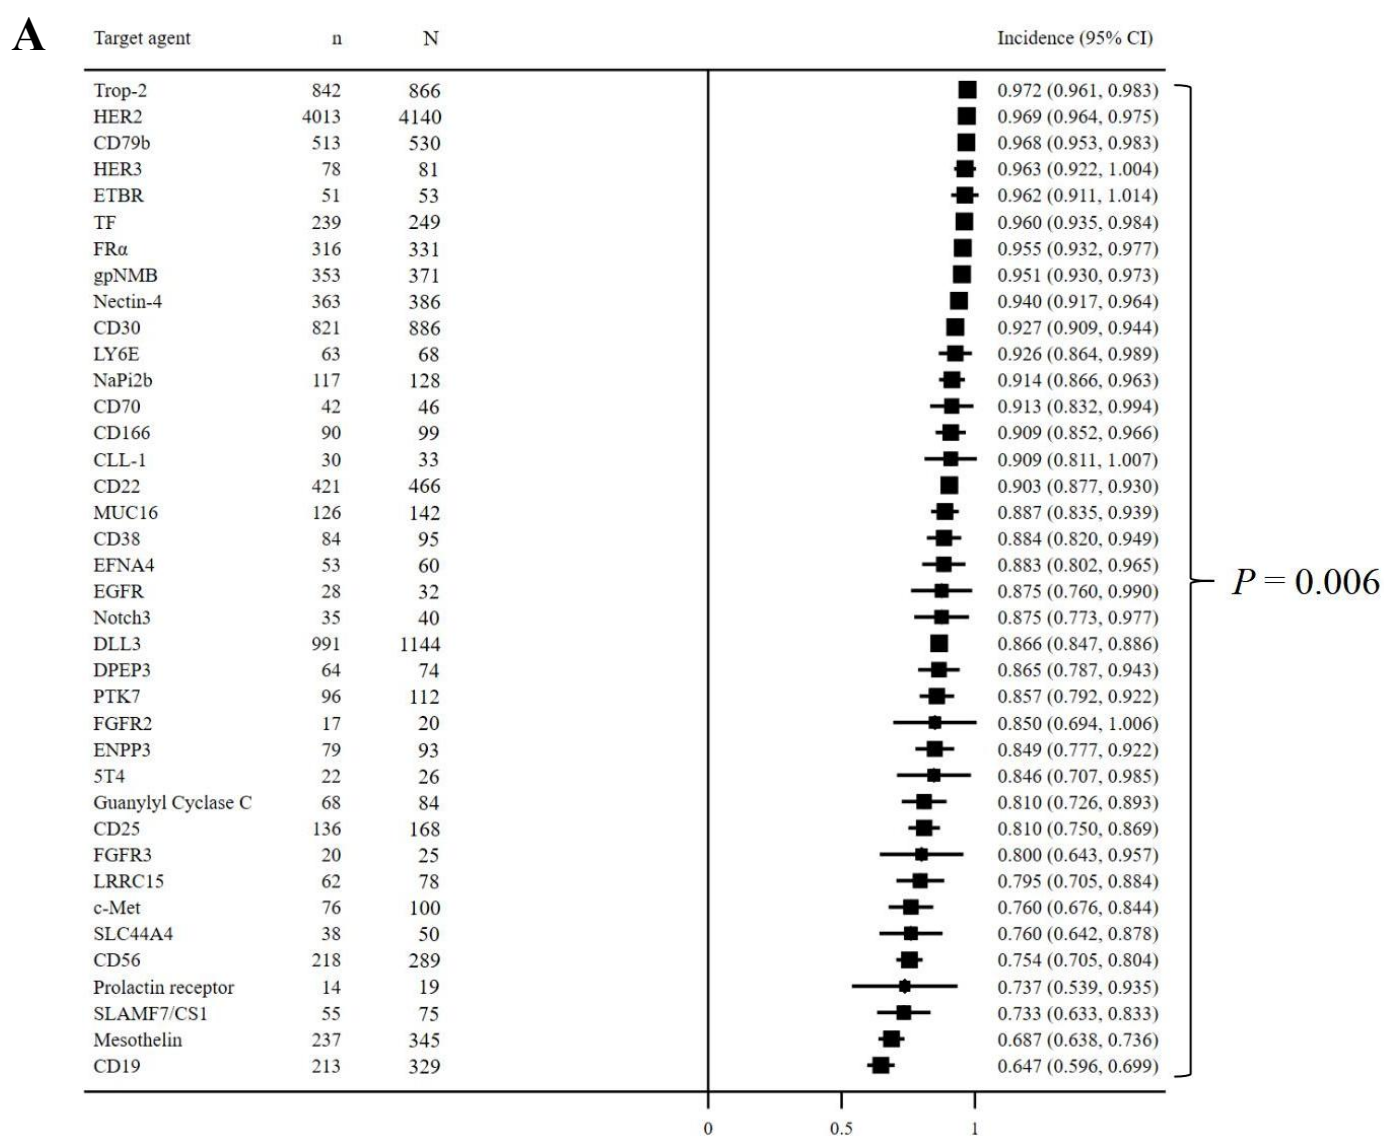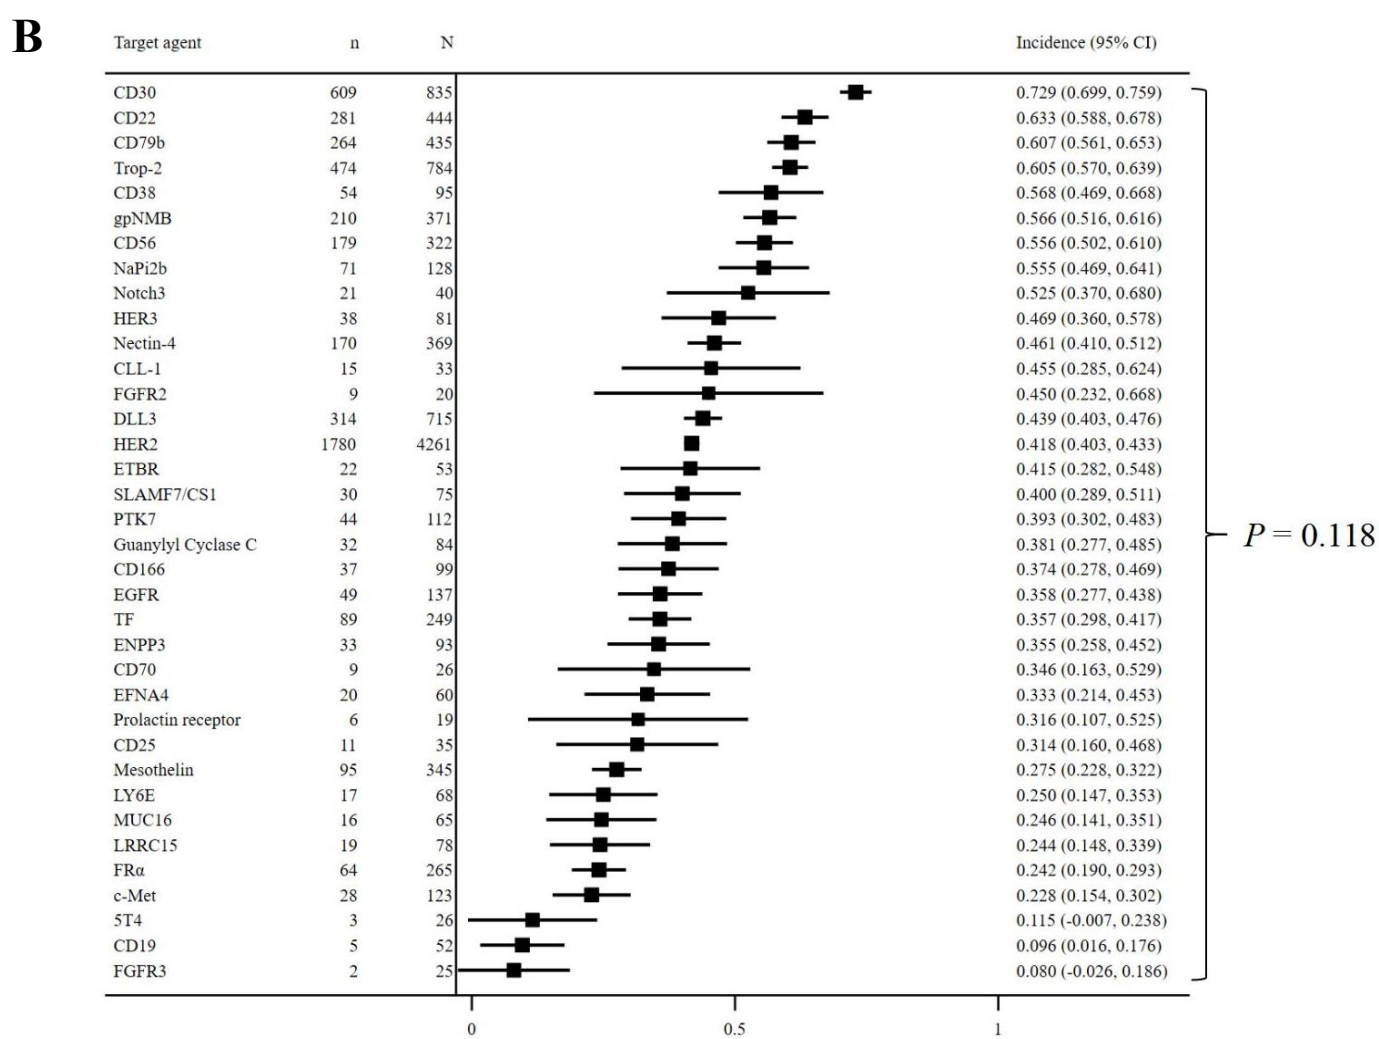

A, All-grade adverse event in each anti-target monoclonal antibody ADC. B, Grade 3 or higher adverse event in each anti-target monoclonal antibody ADC.  $P$ -value is Anova test result.

**eFigure 6. Incidences of all-grade adverse events in main payload-conjugates ADCs (N≥200).**

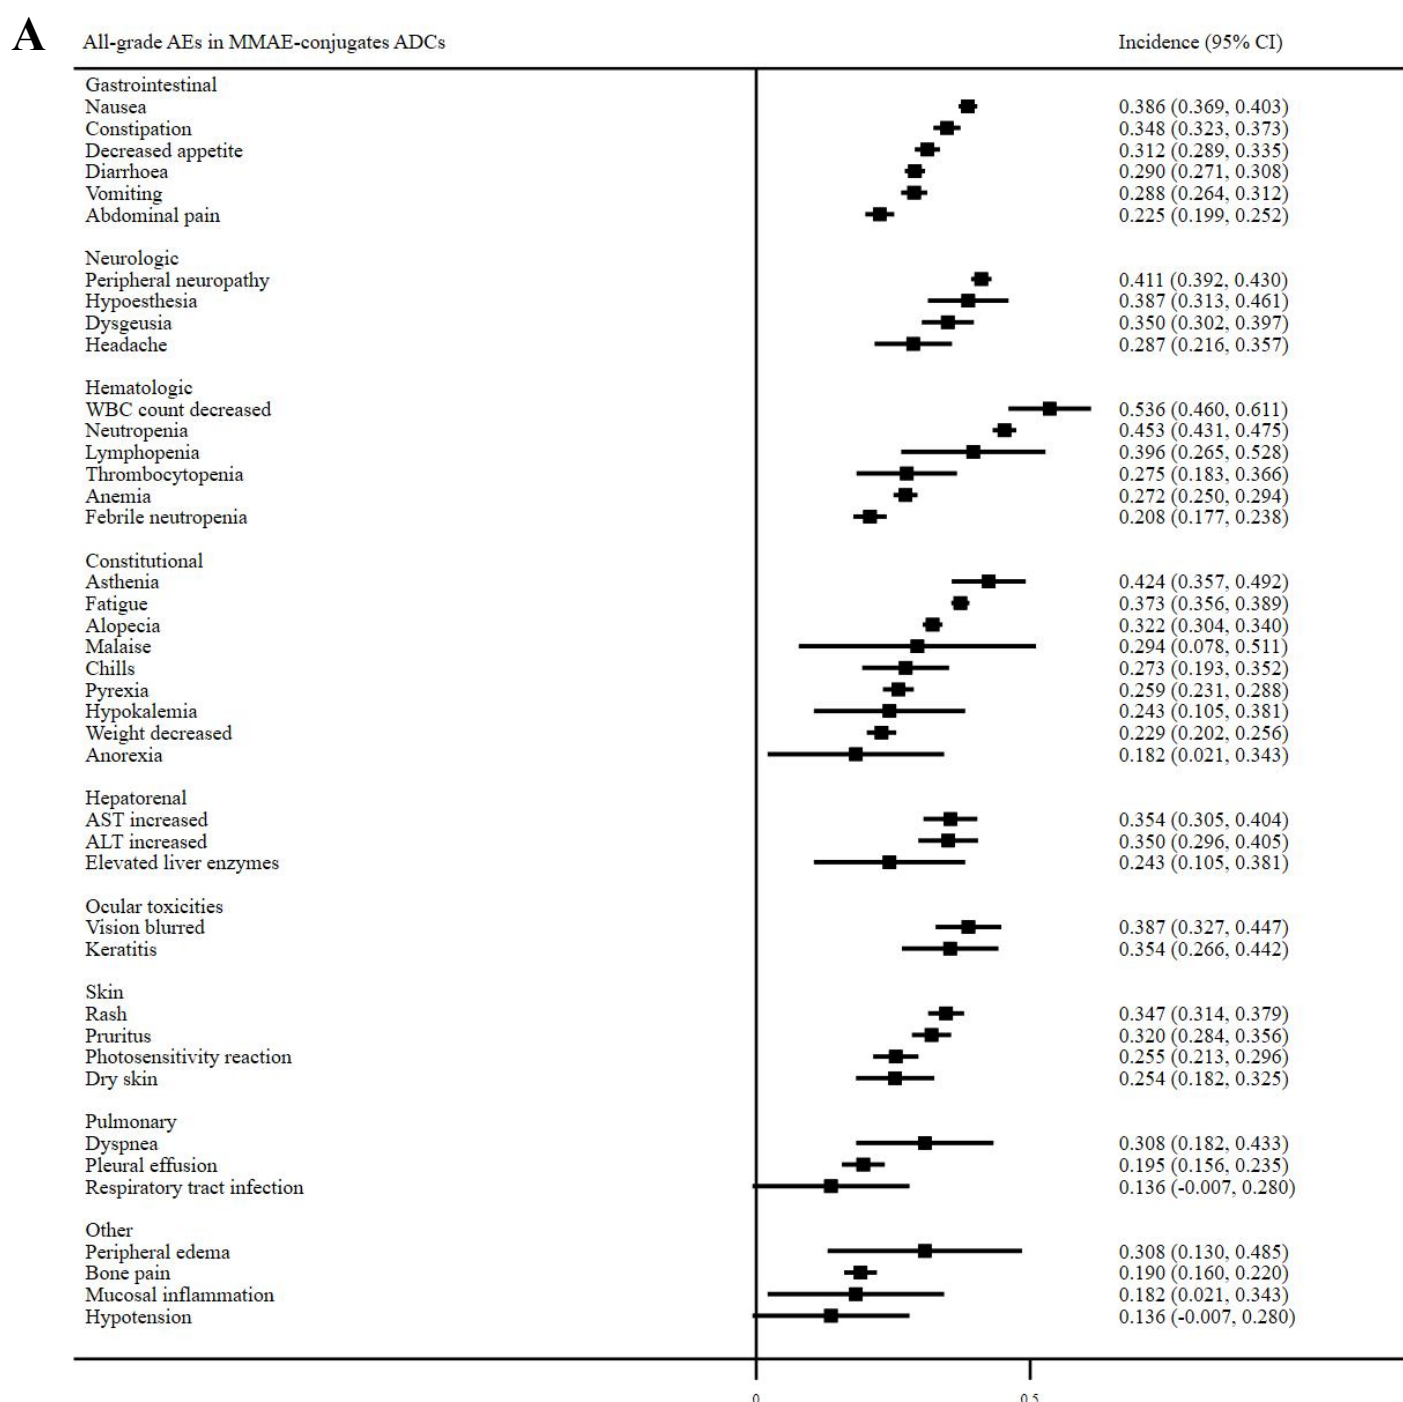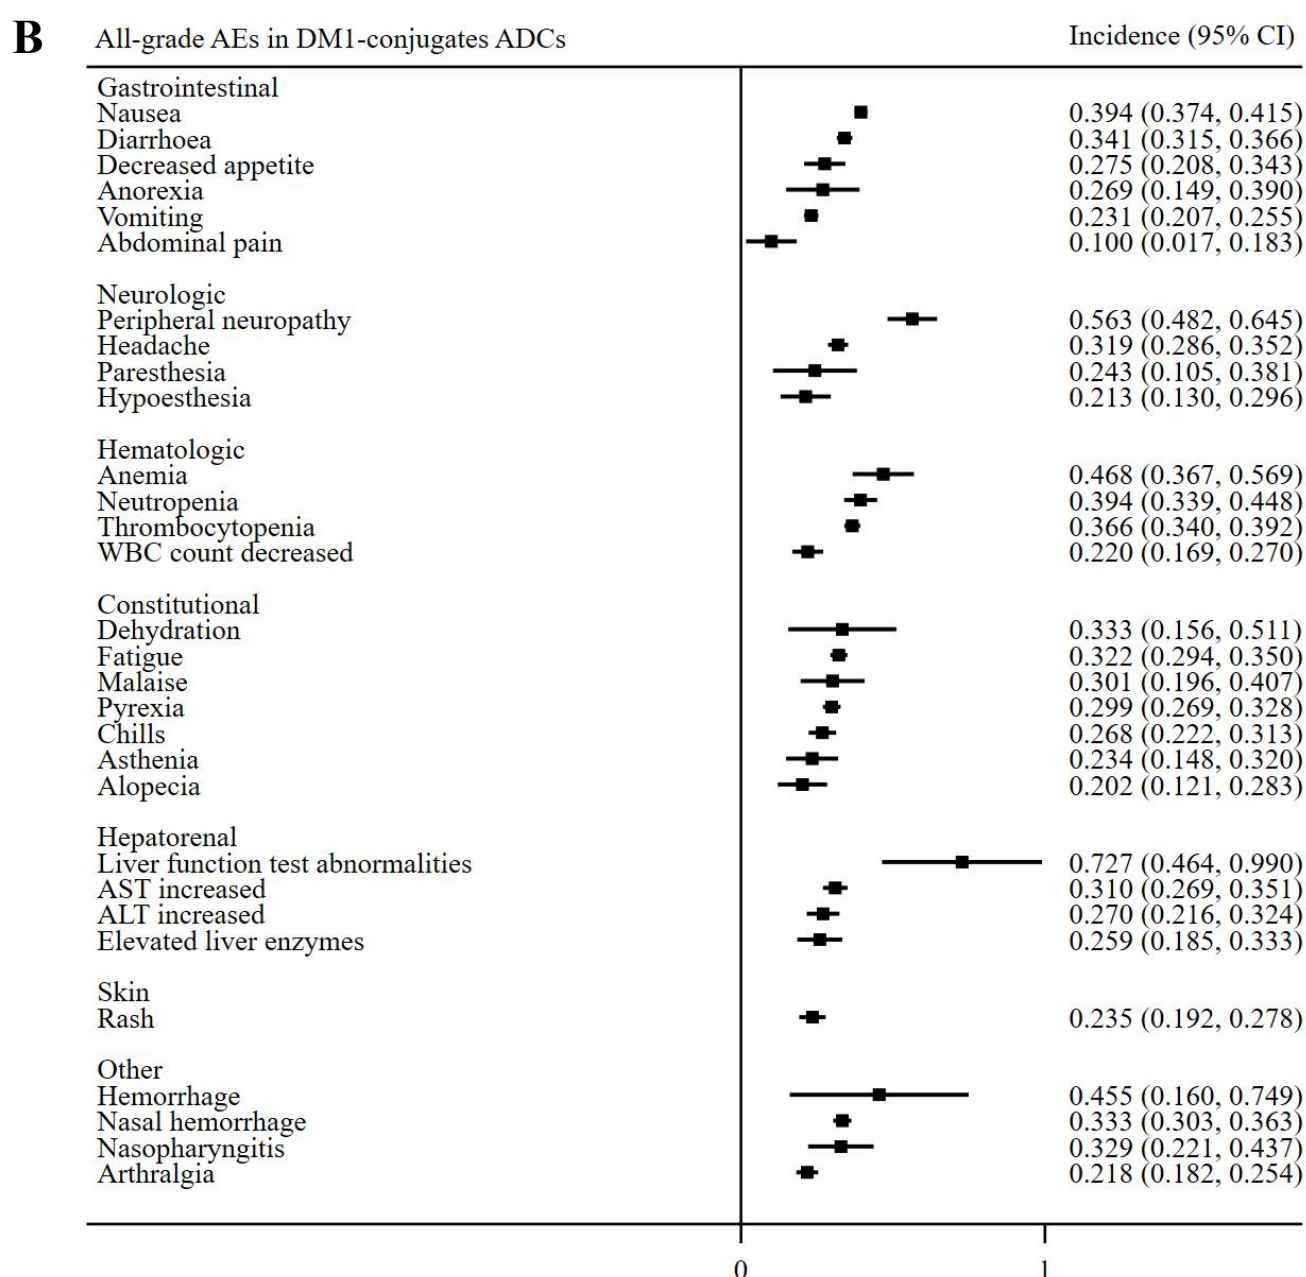

**C**

All-grade AEs in DXd-conjugates ADCs

Incidence (95% CI)

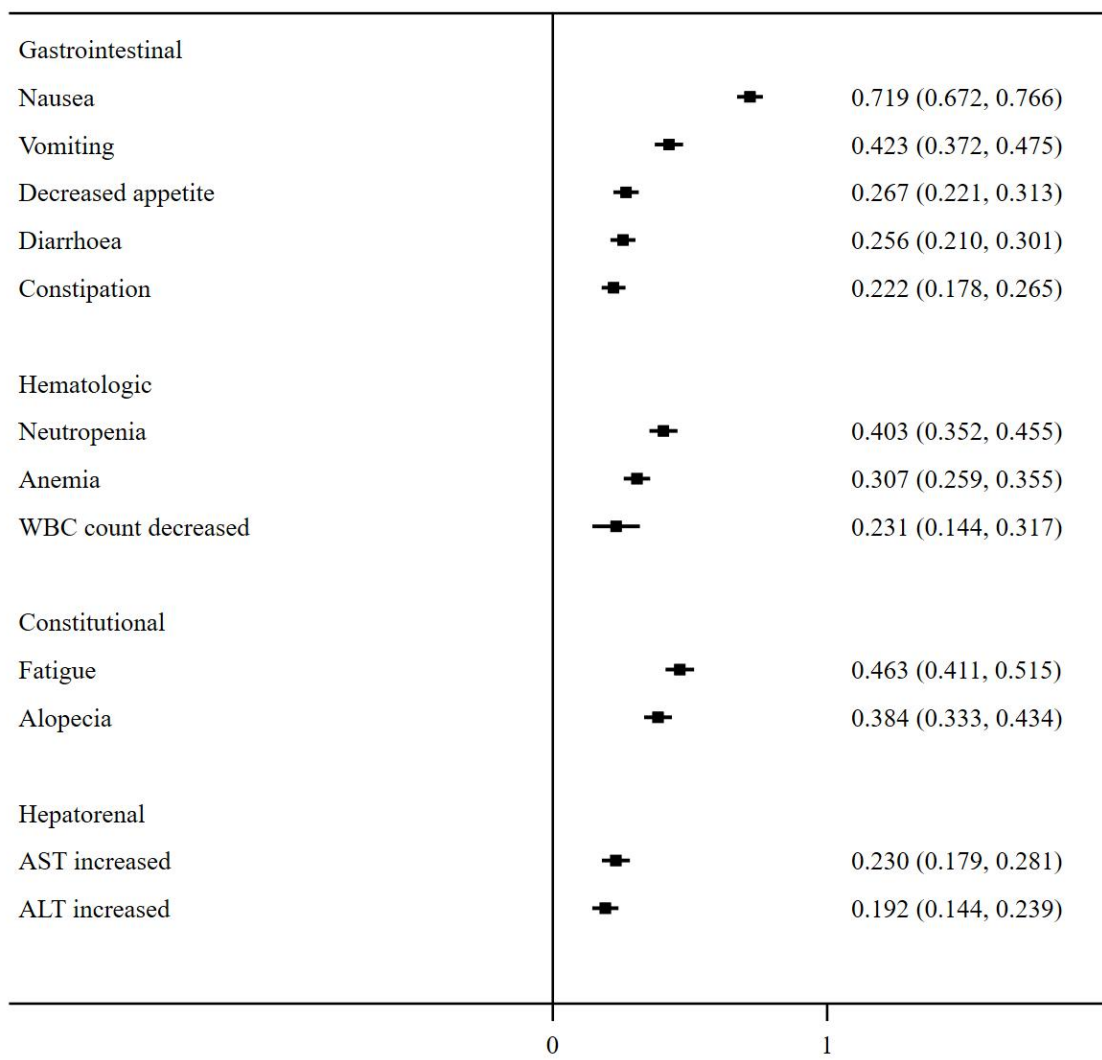**D**

All-grade AEs in PBD-conjugates ADCs

Incidence (95% CI)

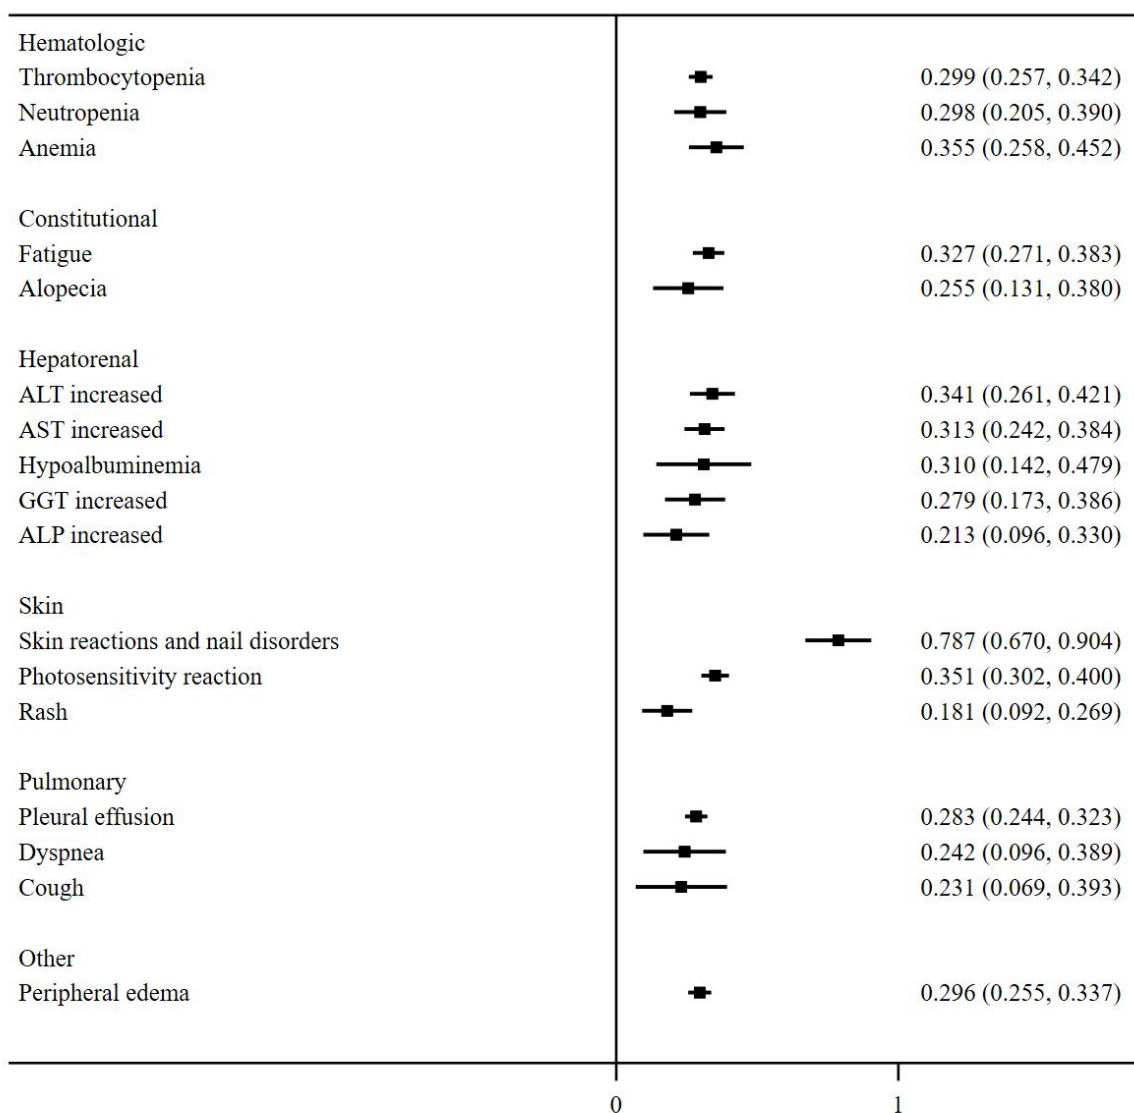



**E**

All-grade AEs in SN-38-conjugates ADCs

Incidence (95% CI)

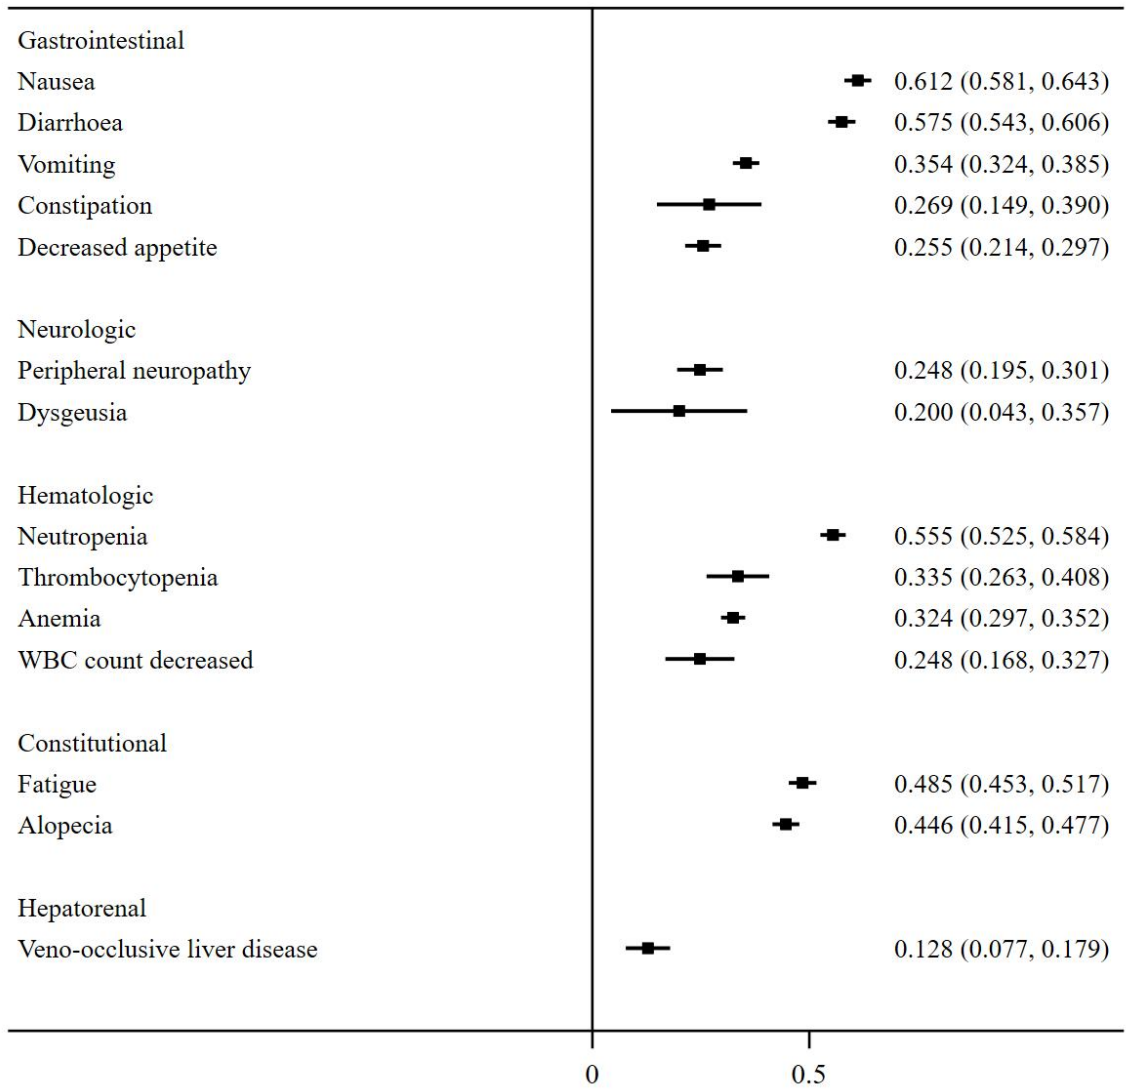

**F**

All-grade AEs in DM4-conjugates ADCs

Incidence (95% CI)

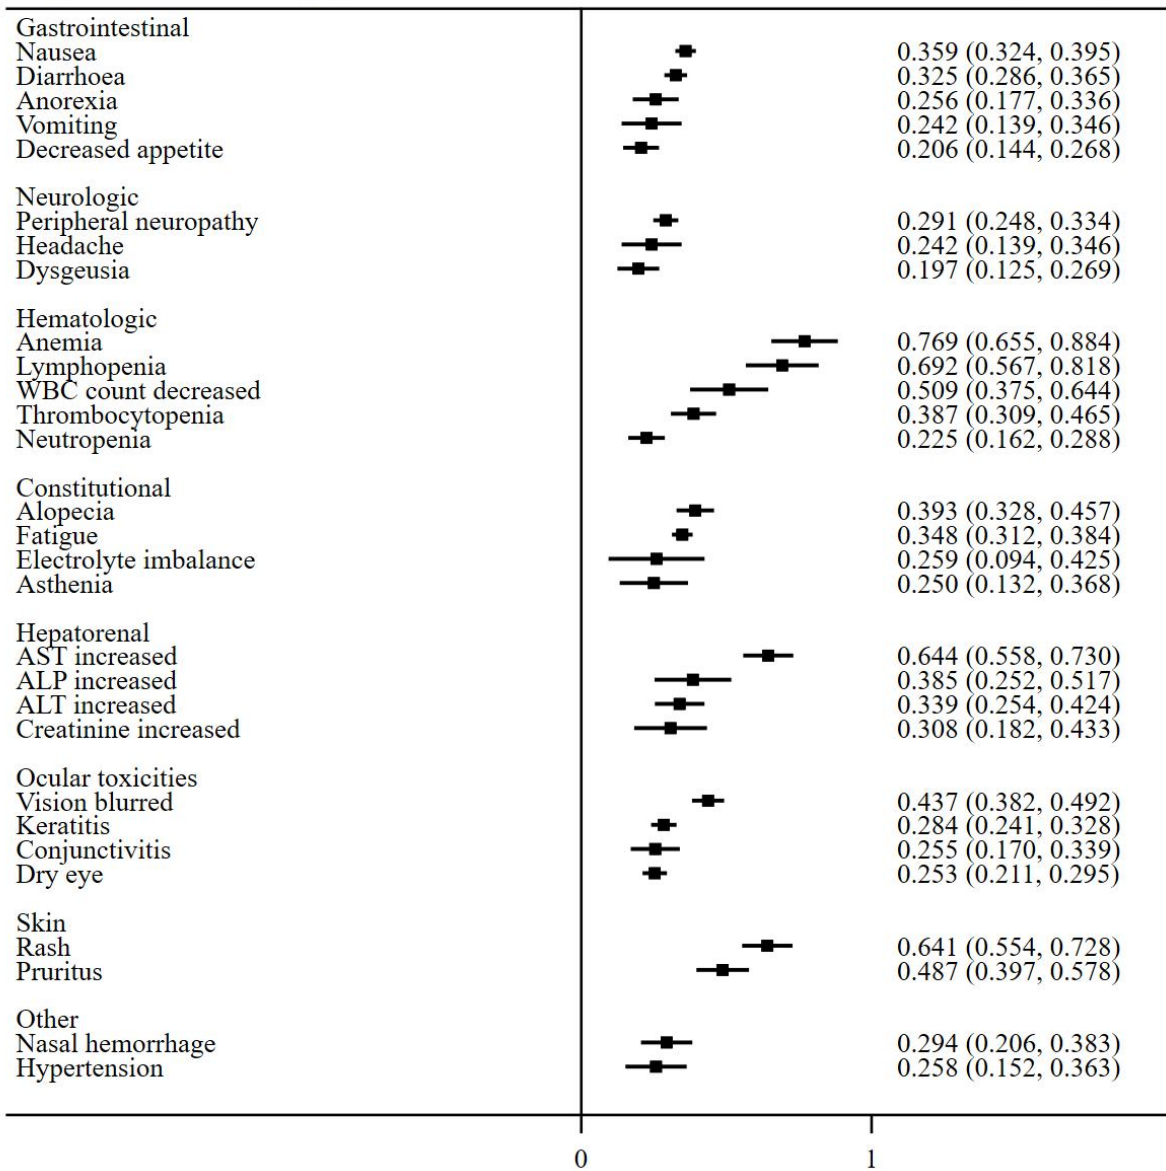

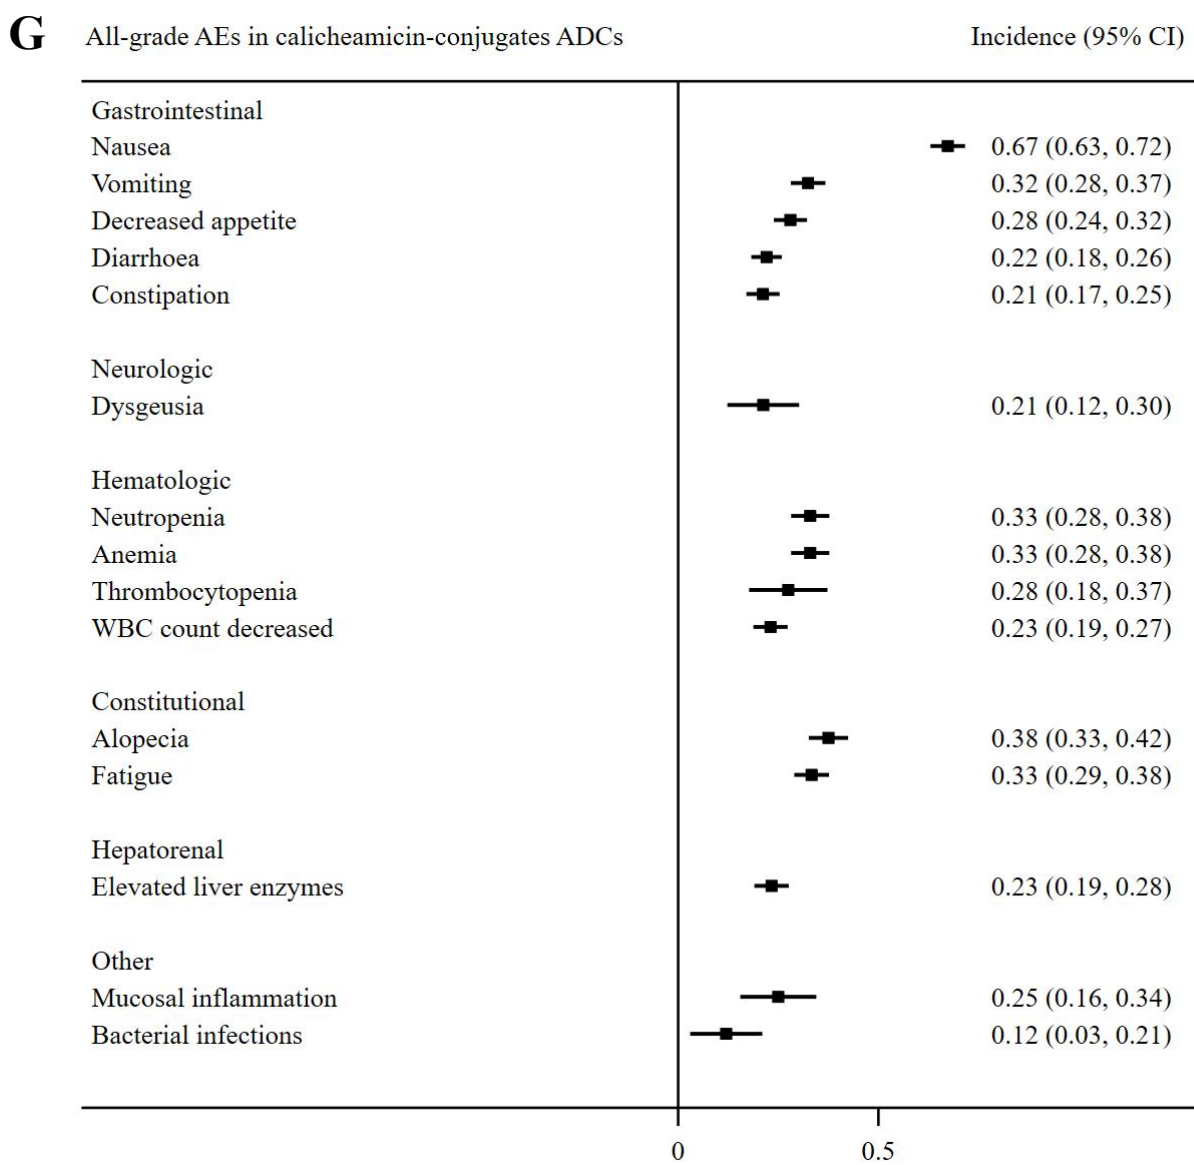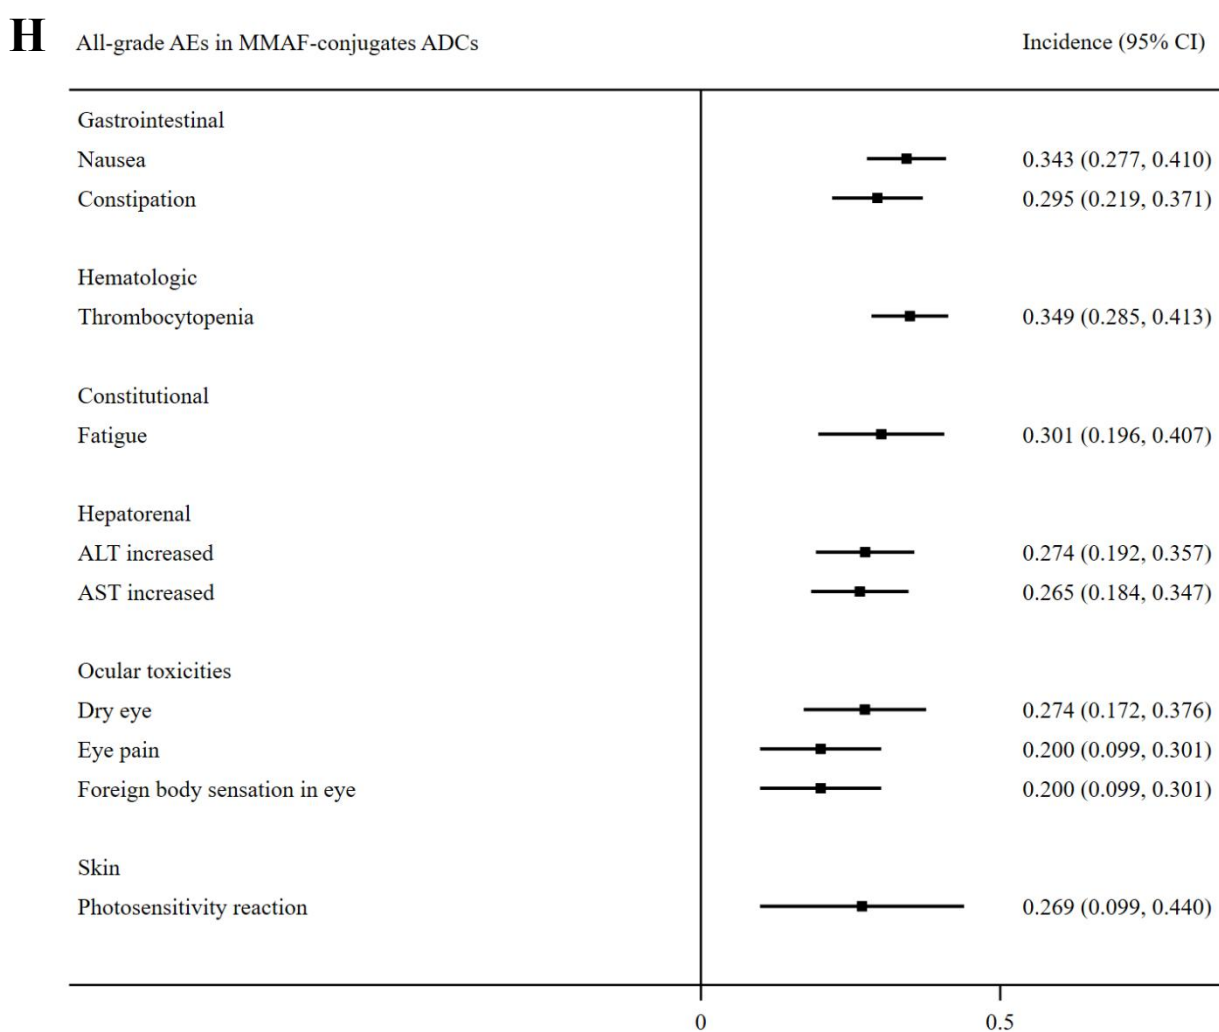

Abbreviation: WBC, white blood cell; GGT, gamma-glutamyl transpeptidase; AST, alanine aminotransferase; ALT, aspartate transaminase; ALP, alkaline phosphatase.

A, Incidences of all-grade adverse events in MMAF-conjugates ADCs. B, Incidences of all-grade adverse events in DM1-conjugates ADCs. C, Incidences of all-grade adverse events in DXd-conjugates ADCs. D, Incidences of all-grade adverse events in PBD-conjugates ADCs. E, Incidences of all-grade adverse events in SN-38-conjugates ADCs. F, Incidences of all-grade adverse events in DM4-conjugates ADCs. G, Incidences of all-grade adverse events in calicheamicin-conjugates ADCs. H, Incidences of all-grade adverse events in MMAF-conjugates ADCs.

**eFigure 7. Incidences of all-grade adverse events in main anti-target monoclonal antibody ADCs (N≥200).**

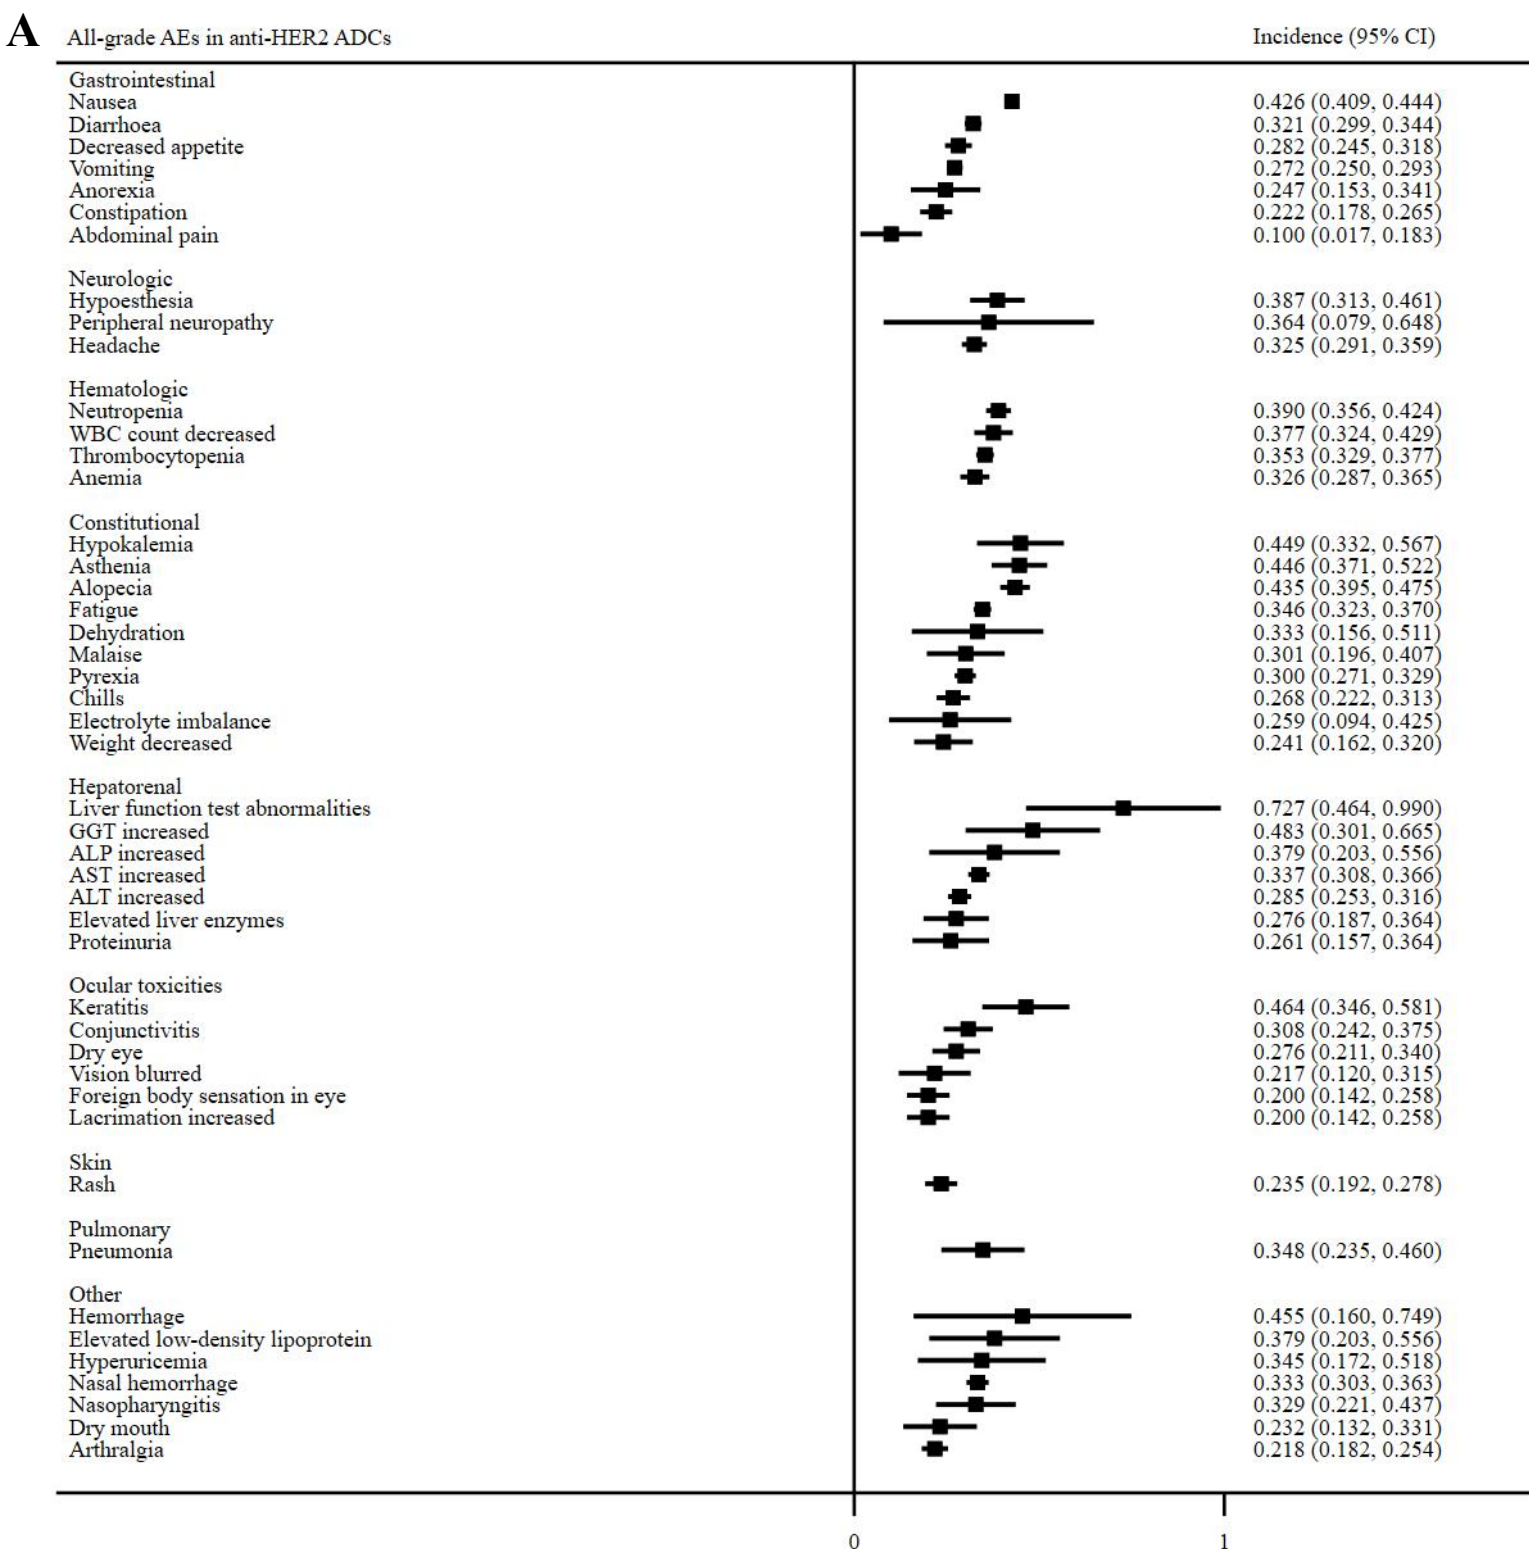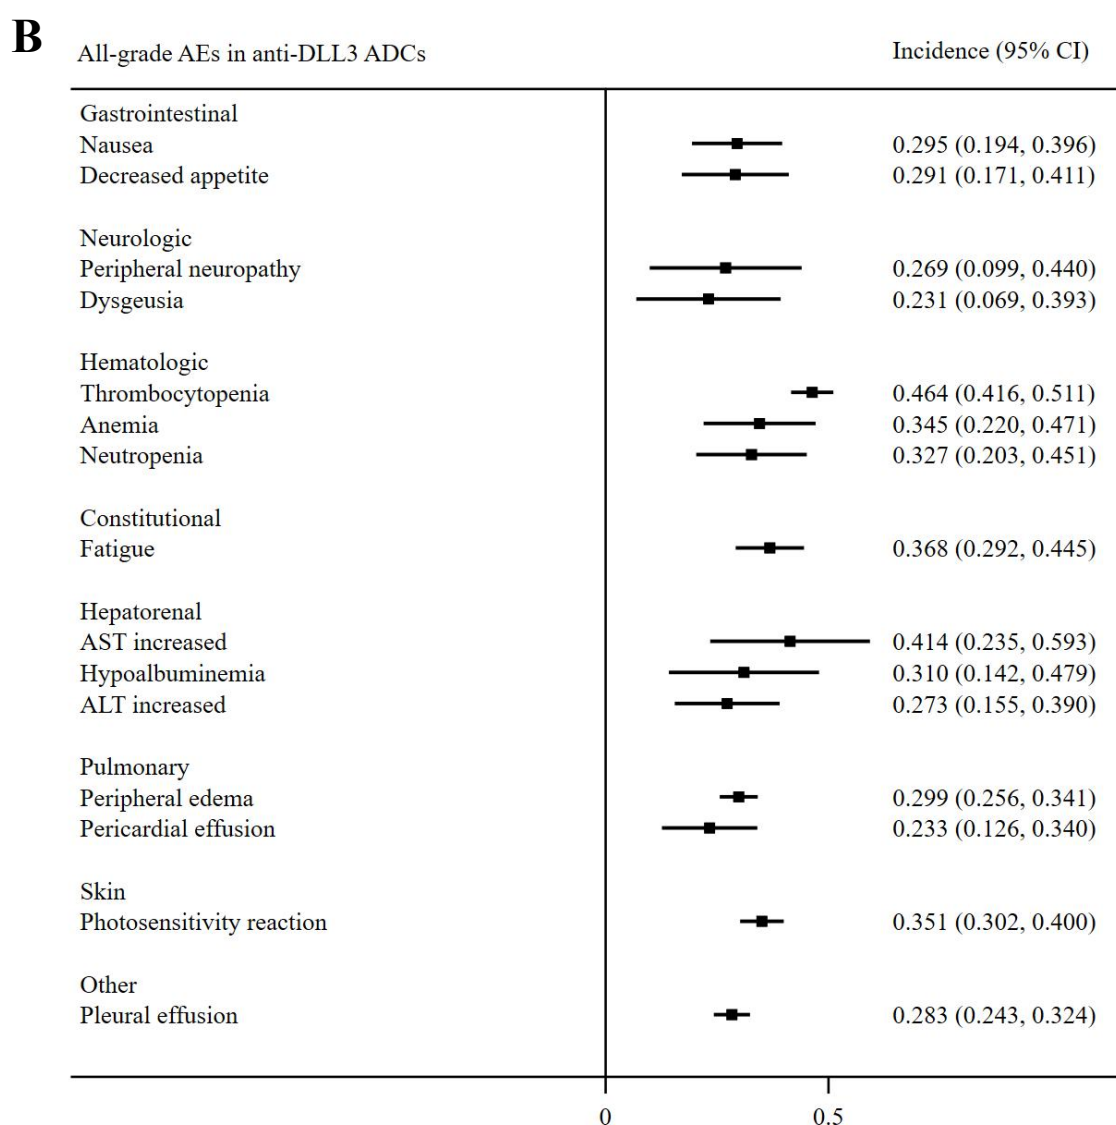

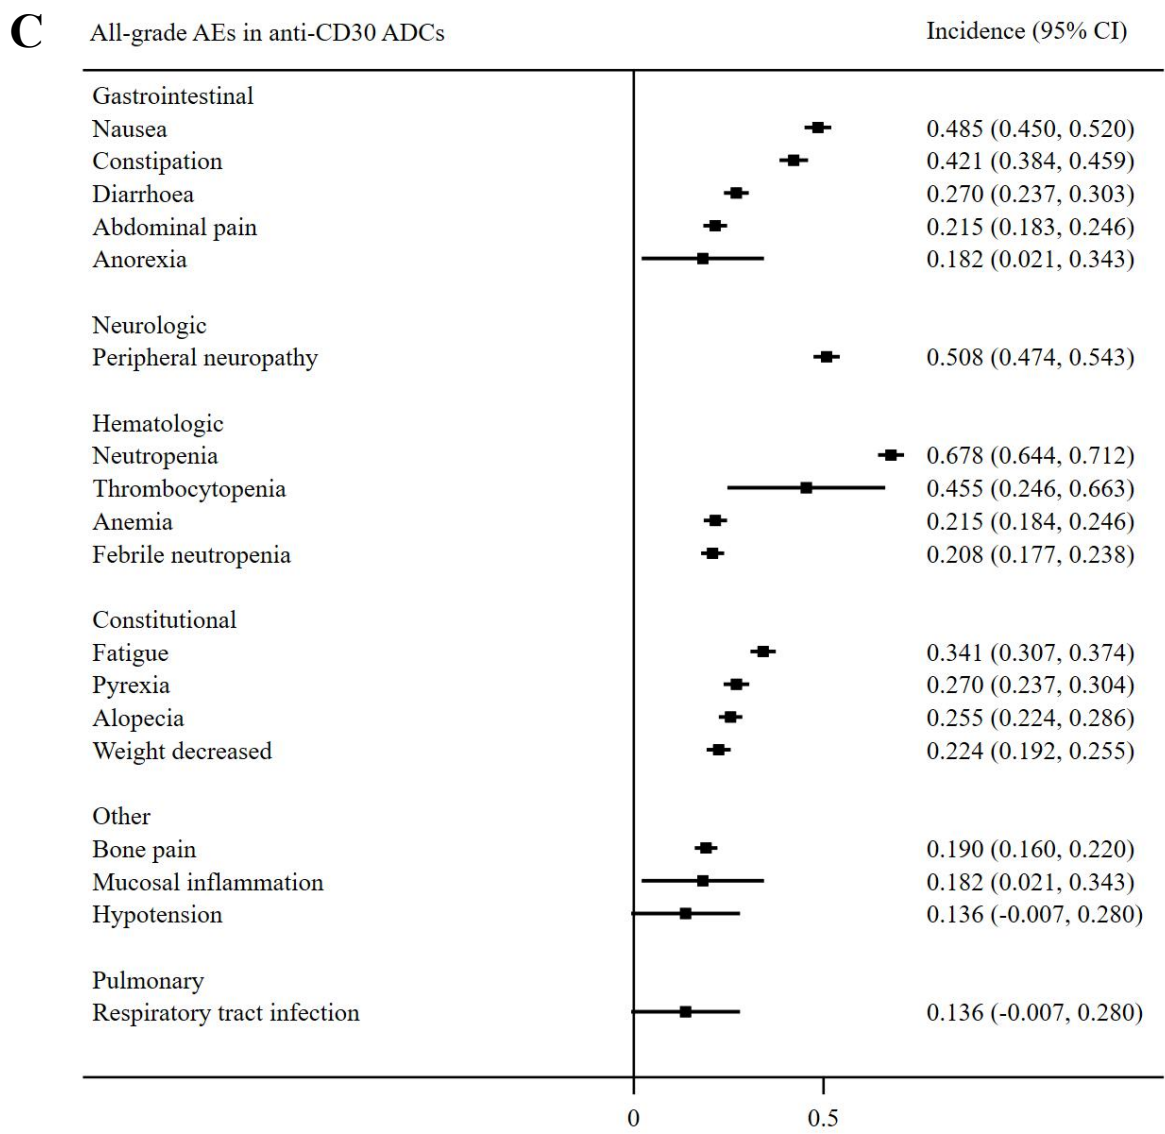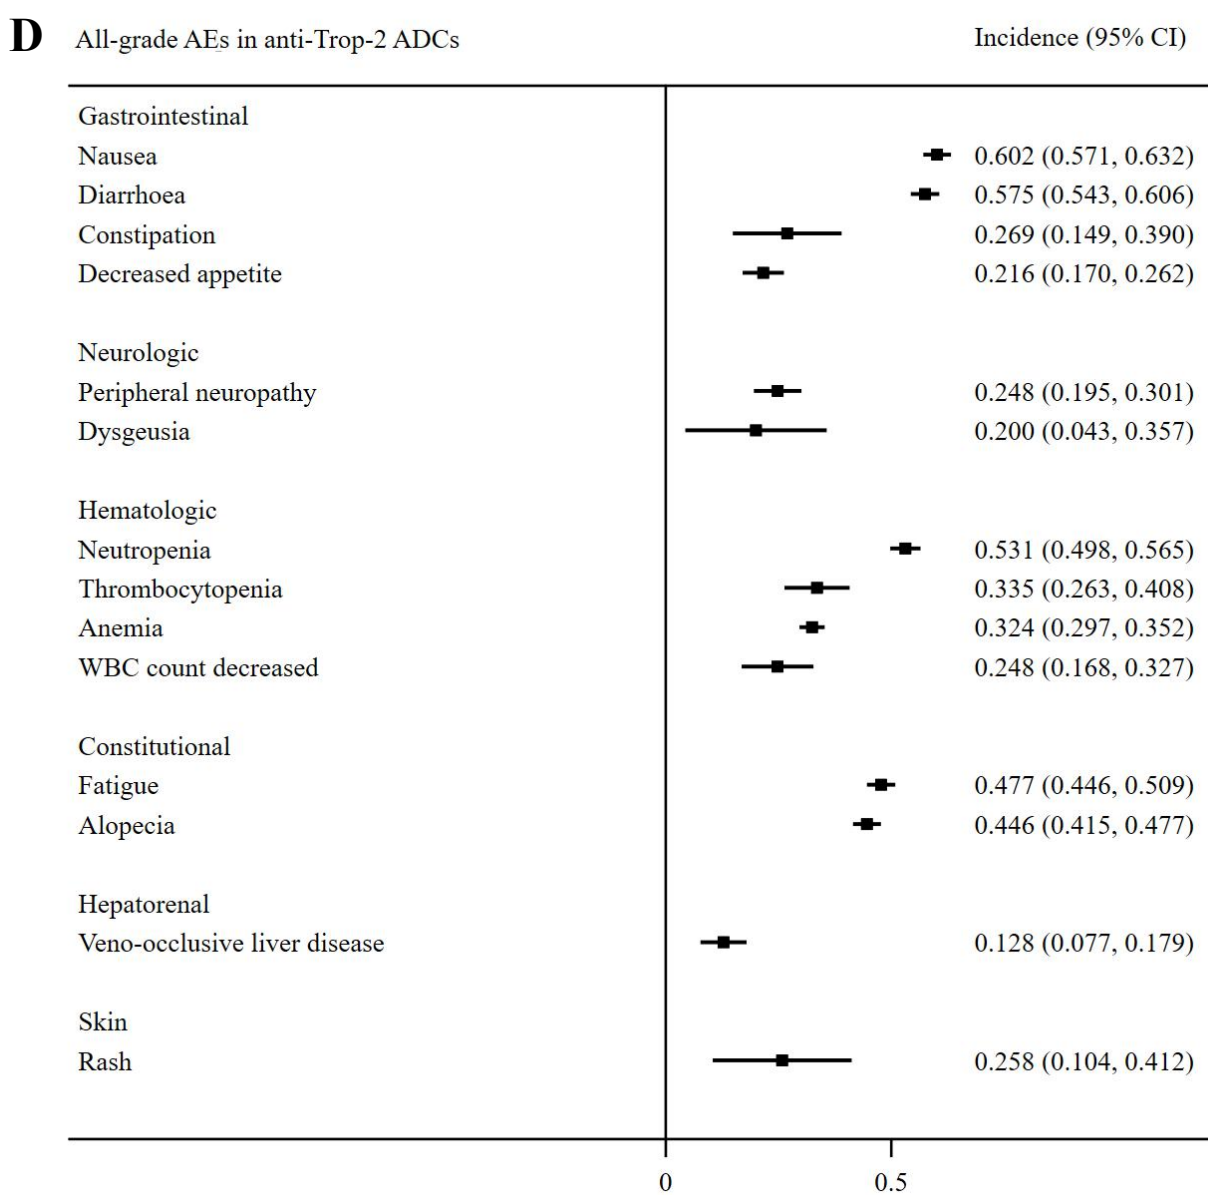

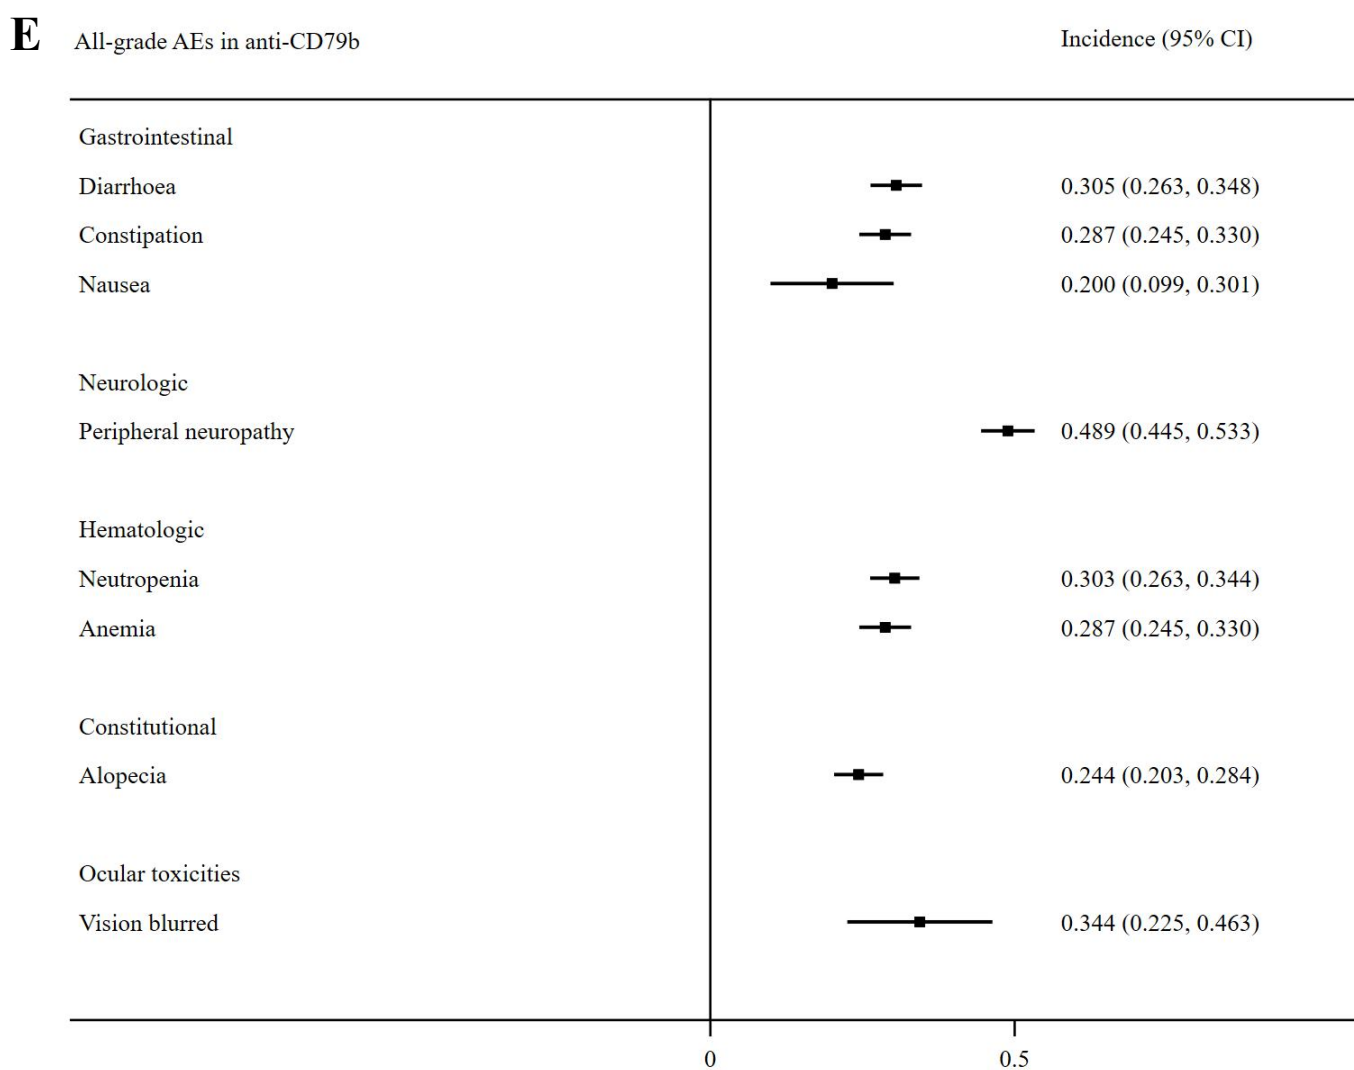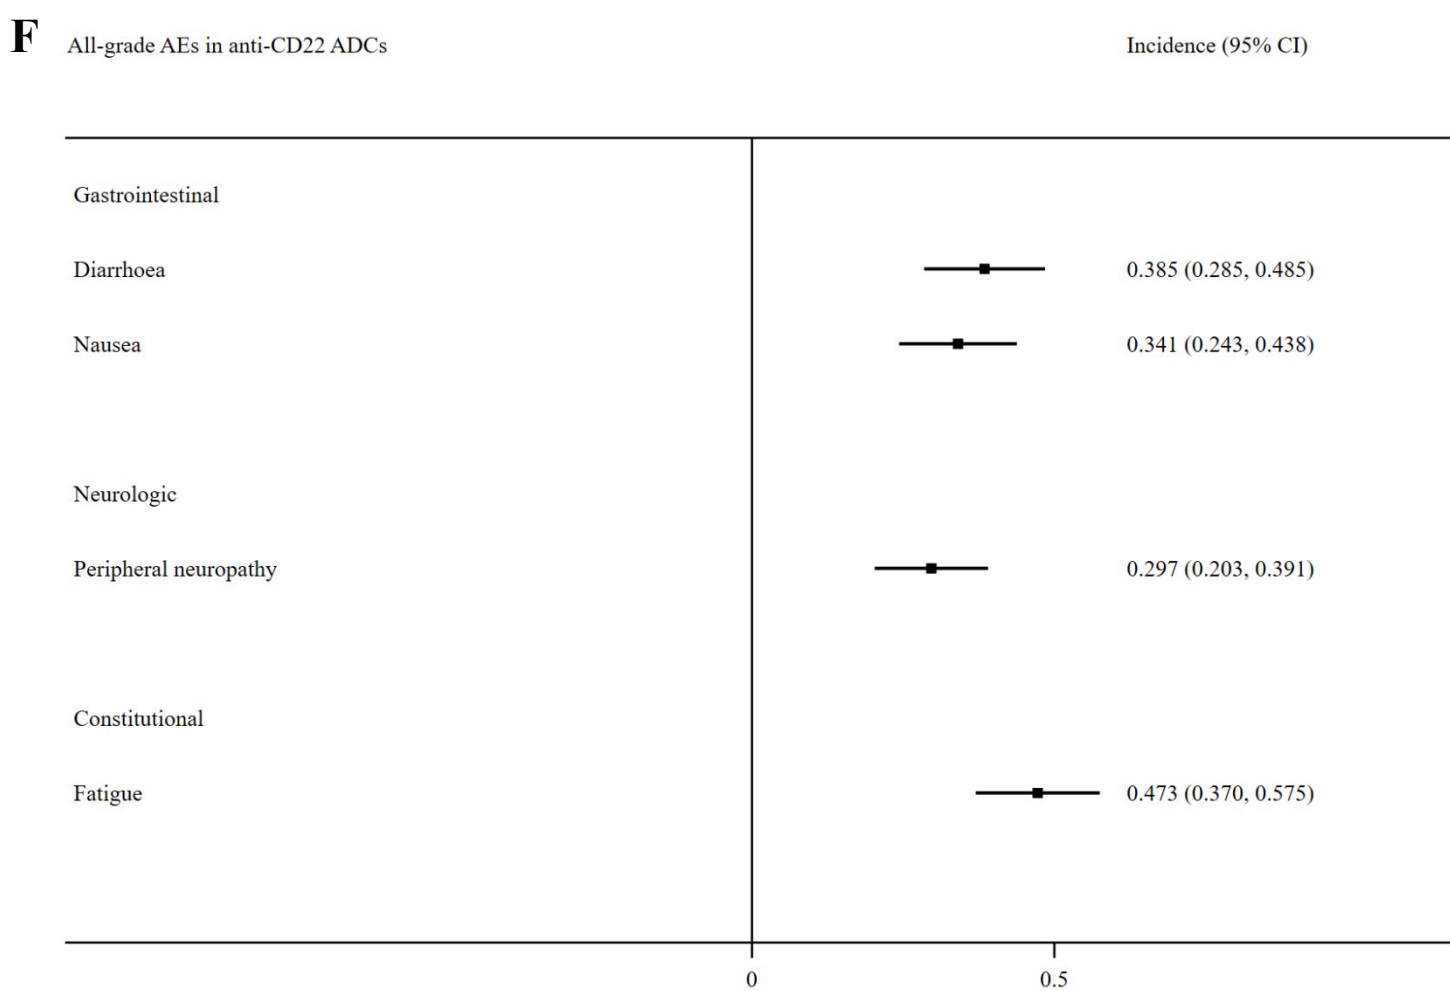

**G** All-grade AEs in anti-Nectin-4 ADCs Incidence (95% CI)

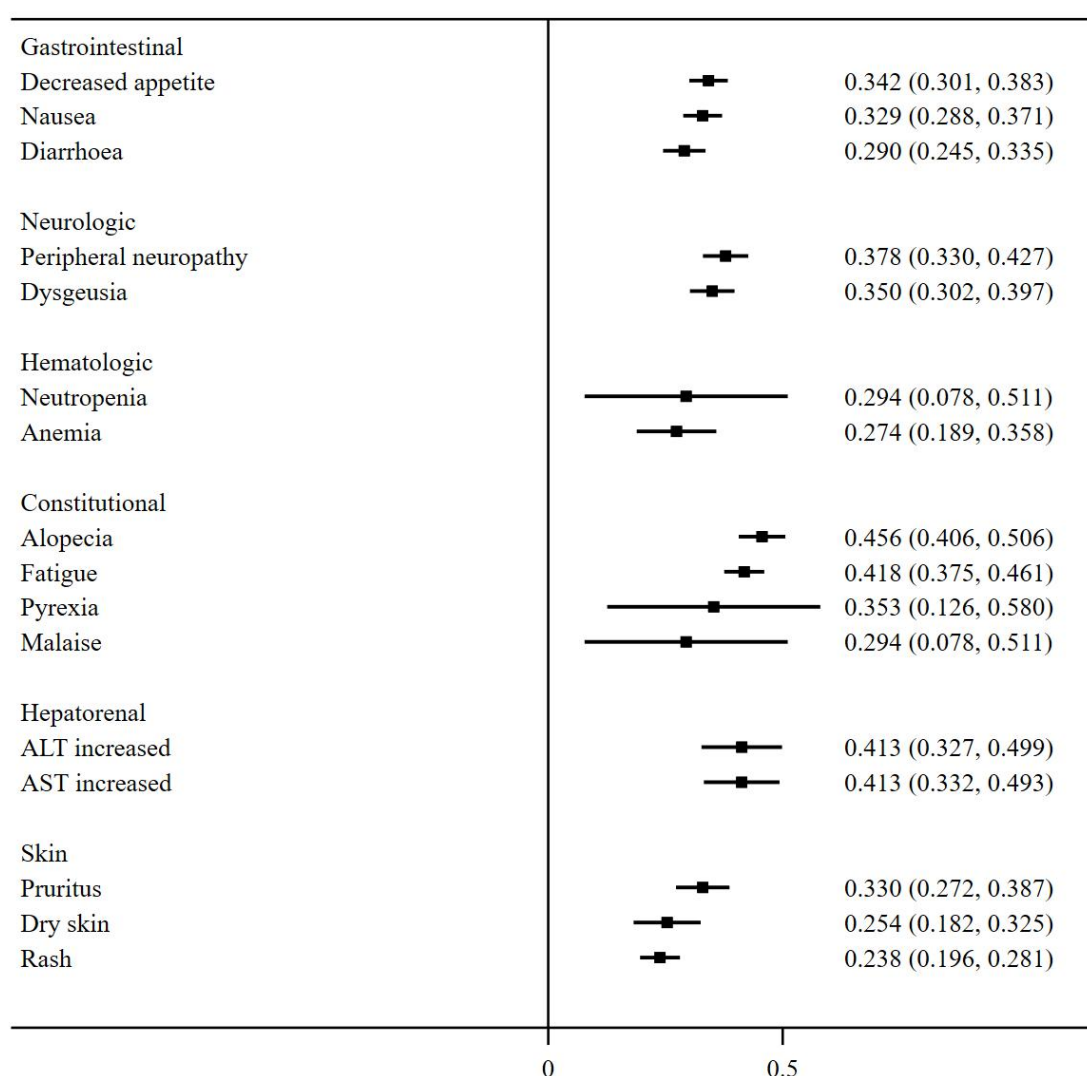

**H** All-grade AEs in anti-gpNMB ADCs Incidence (95% CI)

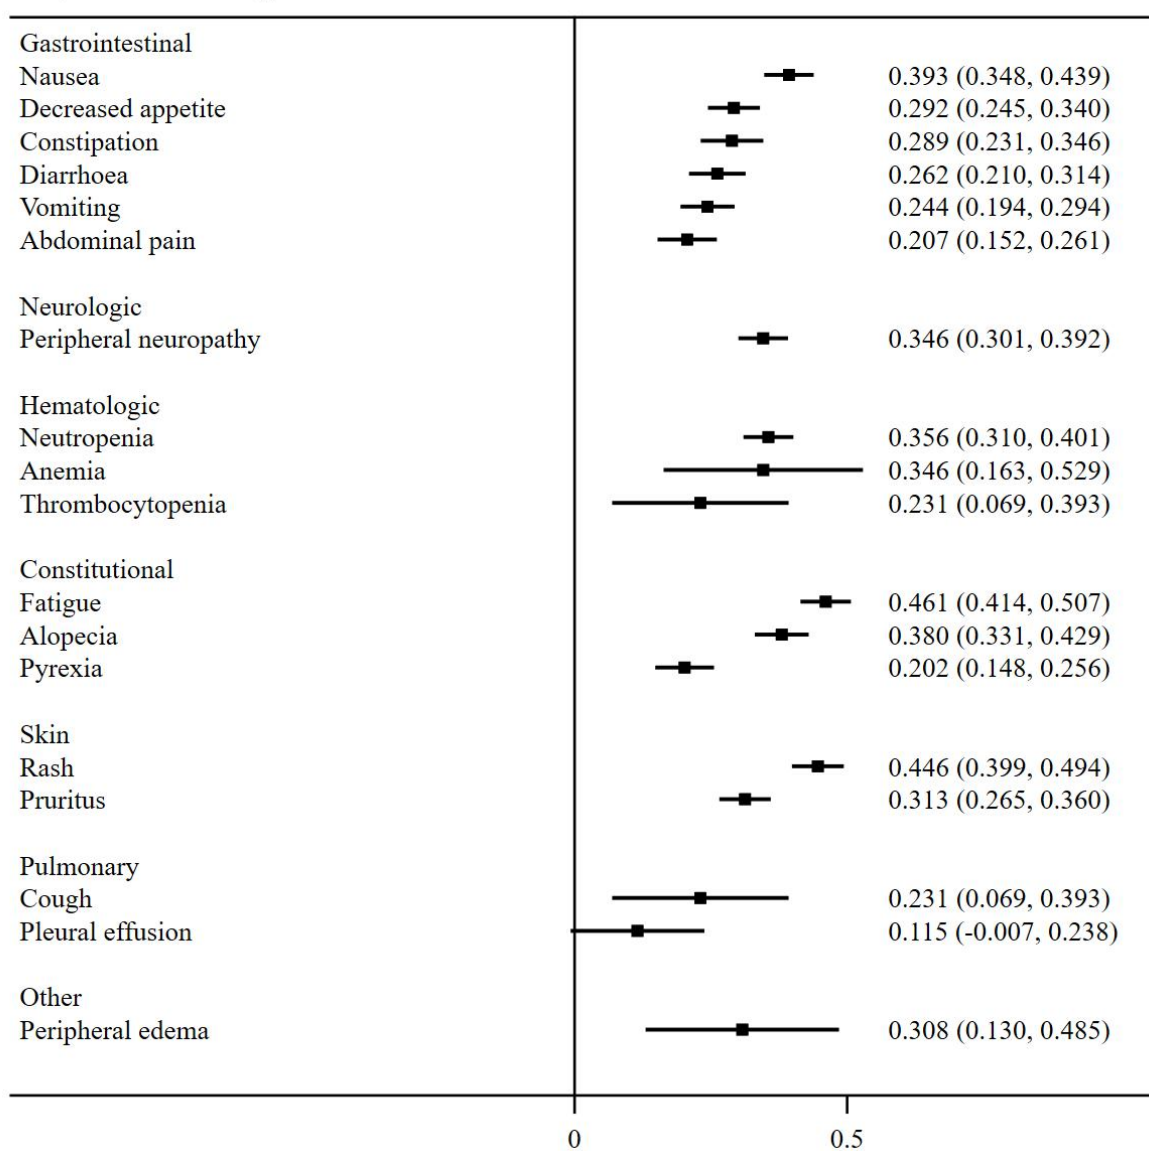

**I** All-grade AEs in anti-mesothelin ADCs

Incidence (95% CI)

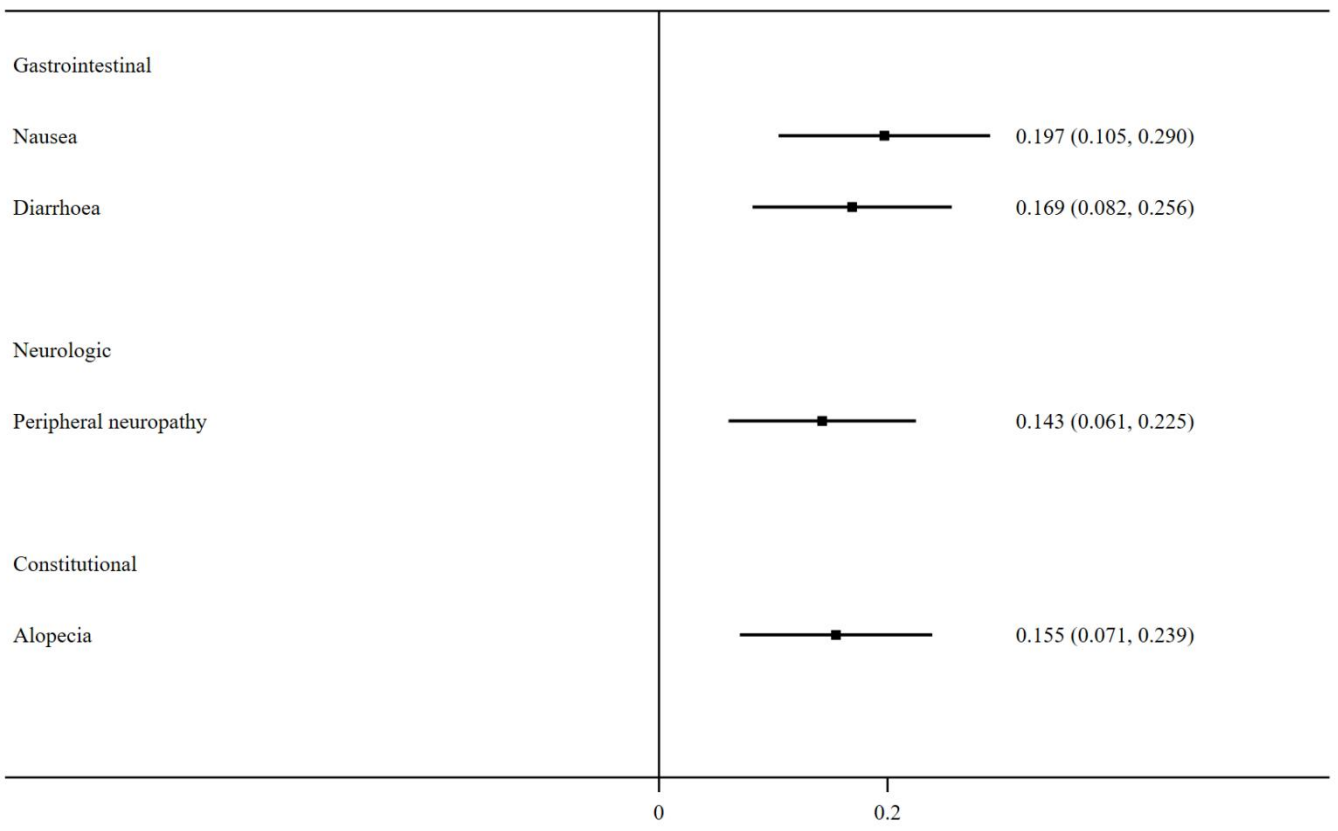

**J** All-grade AEs in anti-FR $\alpha$  ADCs

Incidence (95% CI)

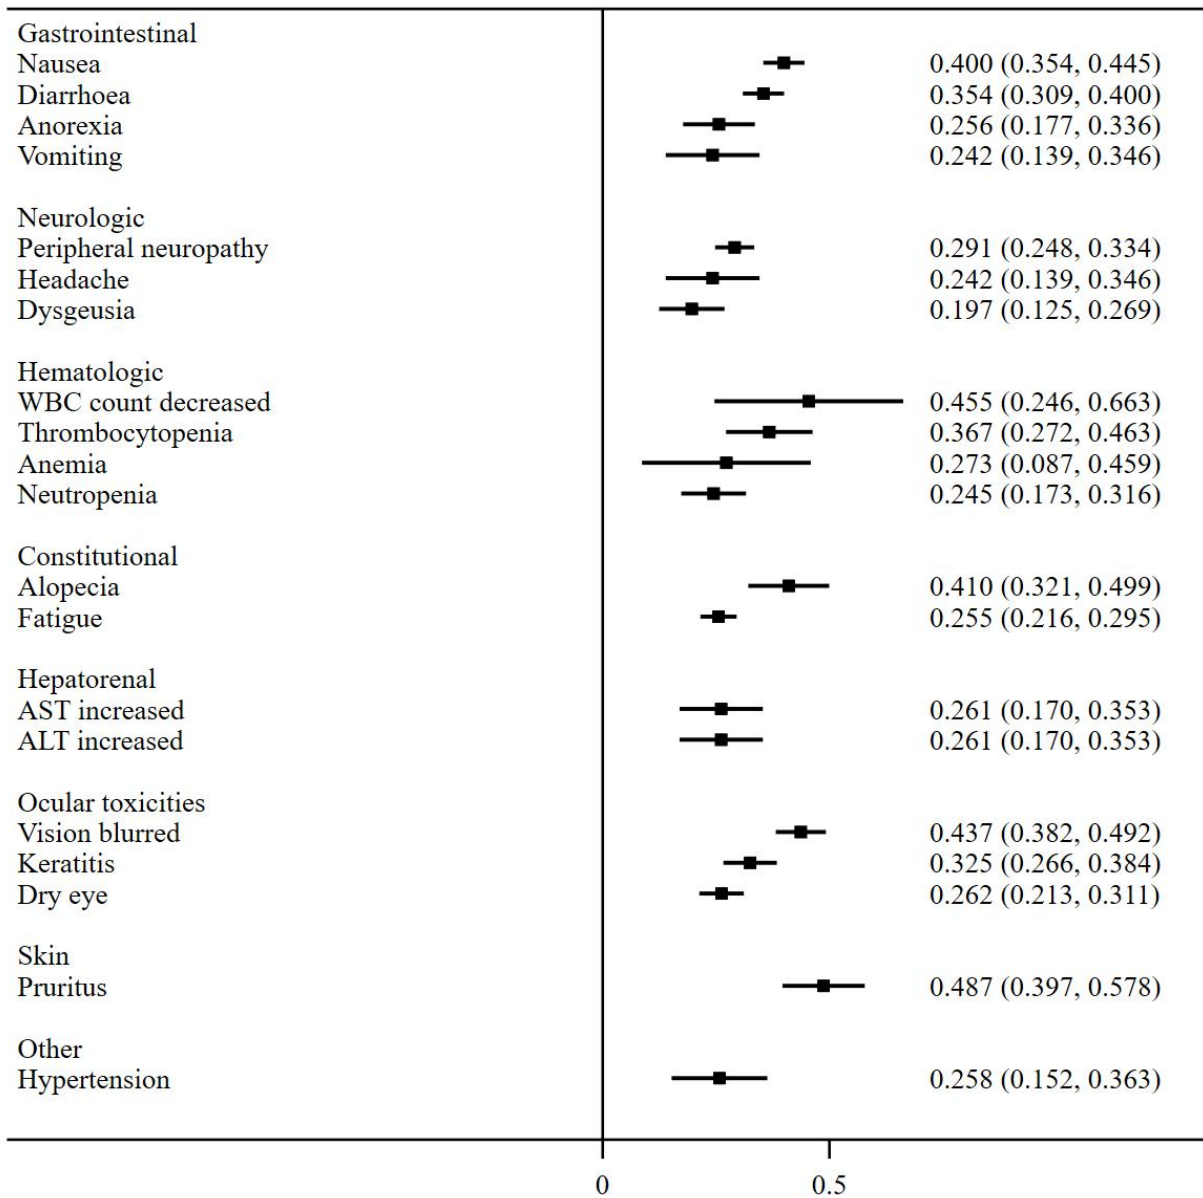

**K** All-grade AEs in anti-CD19 ADCs Incidence (95% CI)

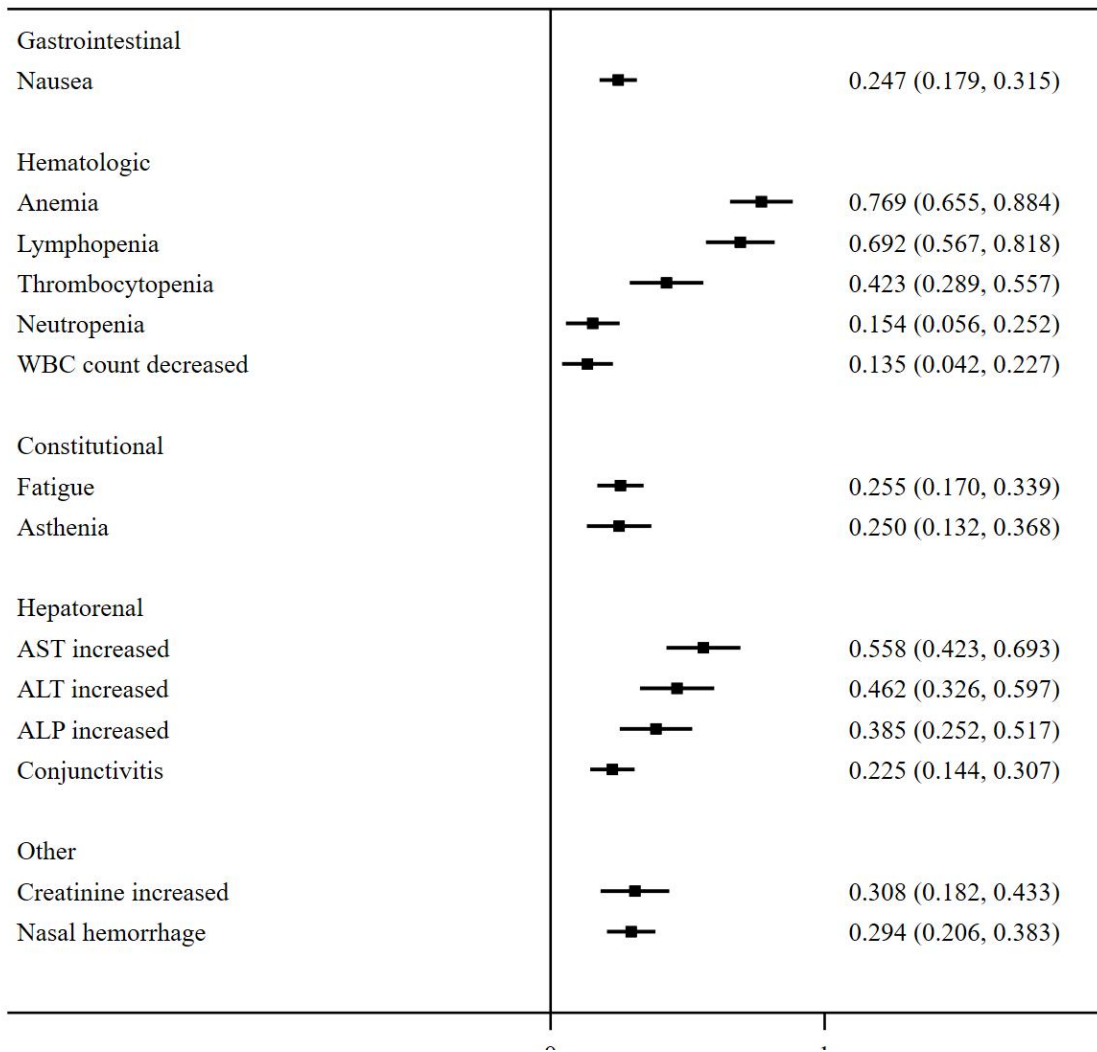

**L** All-grade AEs in anti-CD56 ADCs Incidence (95% CI)

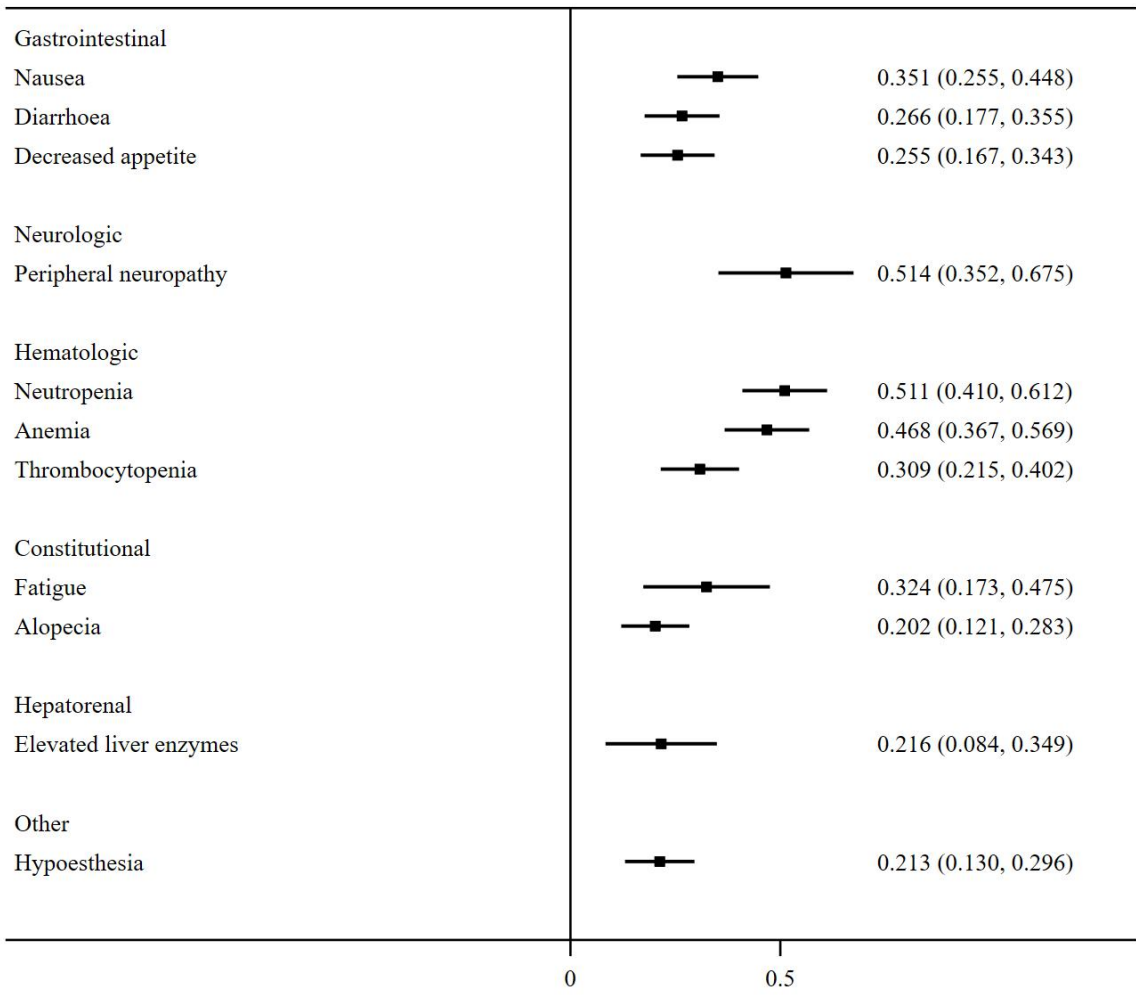

Abbreviation: WBC, white blood cell; GGT, gamma-glutamyl transpeptidase; AST, alanine aminotransferase; ALT, aspartate transaminase; ALP, alkaline phosphatase.

A, Incidences of all-grade adverse events in anti-HER2 mAb ADCs. B, Incidences of all-grade adverse events in anti-DLL3 mAb ADCs. C, Incidences of all-grade adverse events in anti-CD30 mAb ADCs. D, Incidences of all-grade adverse events in anti-Trop-2 mAb ADCs. E, Incidences of all-grade adverse events in anti-CD79b mAb ADCs. F, Incidences of all-grade adverse events in anti-CD22 mAb ADCs. G, Incidences of all-grade adverse events in anti-Nectin-4 mAb ADCs. H, Incidences of all-grade adverse events in anti-gpNMB mAb ADCs. I, Incidences of all-grade adverse events in anti-mesothelin mAb ADCs. J, Incidences of all-grade adverse events in anti-FRa mAb ADCs. K, Incidences of all-grade adverse events in anti-CD19 mAb ADCs. L, Incidences of all-grade adverse events in anti-CD56 mAb ADCs.



**eFigure 8. Subgroup analysis of overall adverse event incidence by cancer type.**

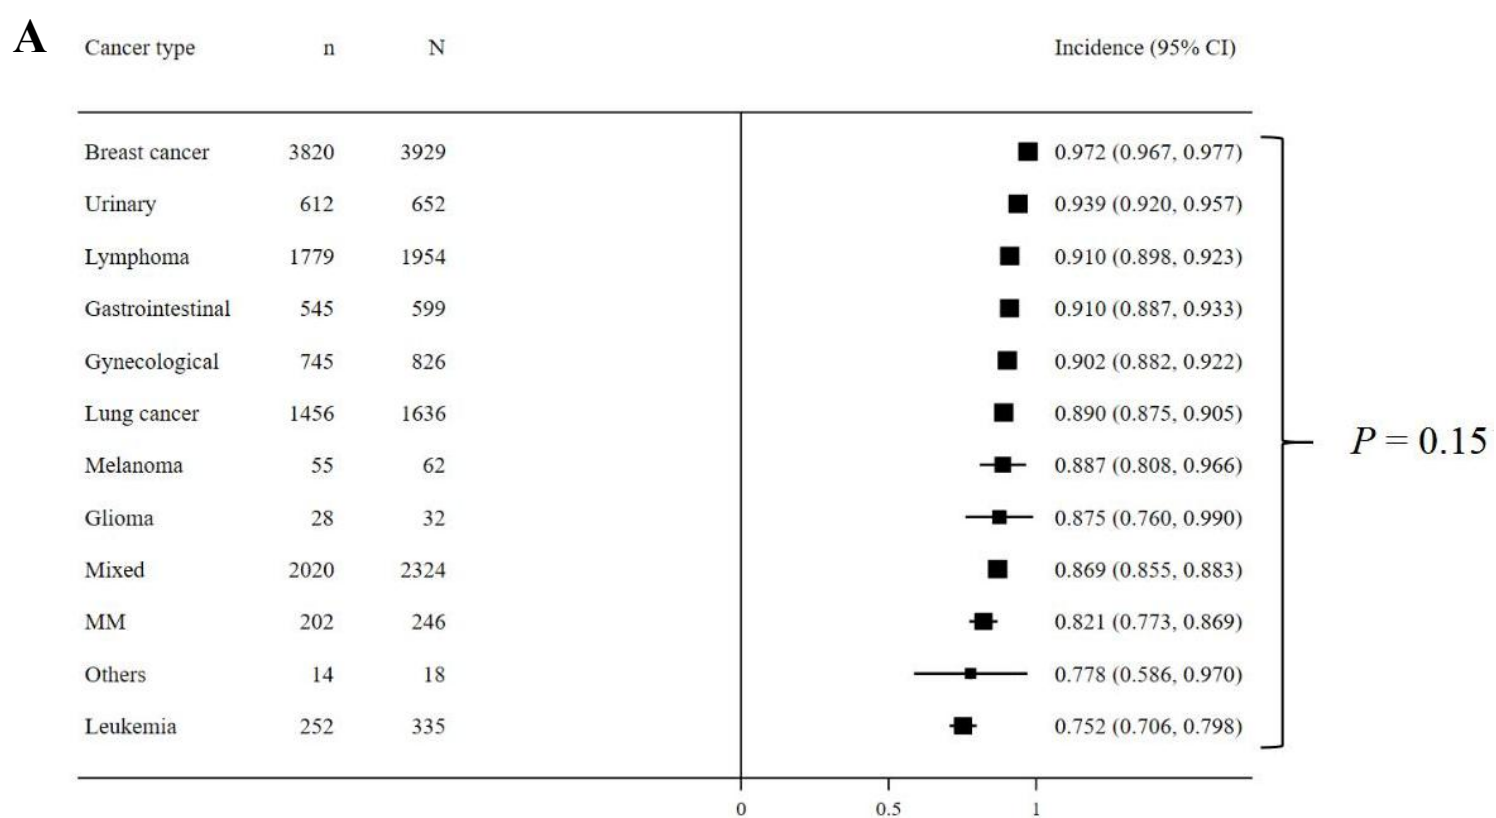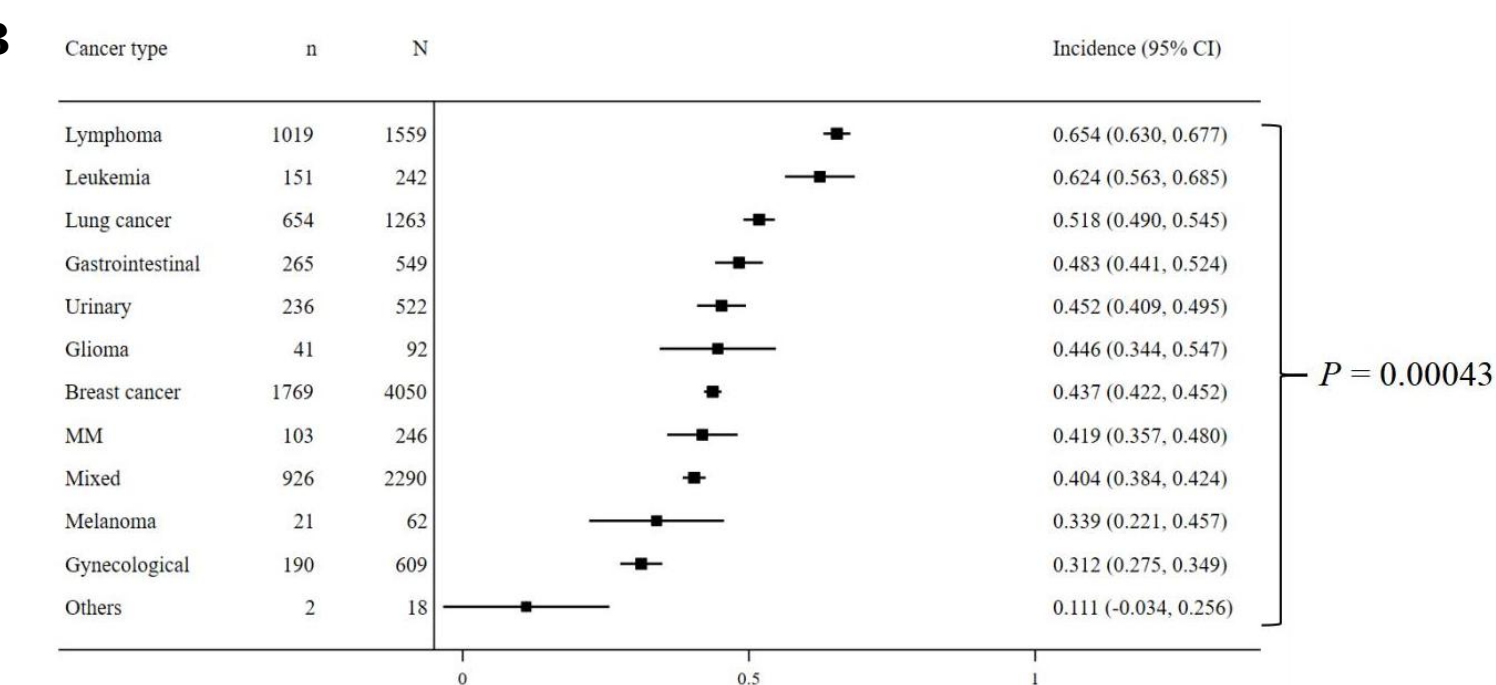

Abbreviation: MM, multiple myeloma.

A, All-grade adverse event. B, Grade 3 or higher adverse event.

**eFigure 9. Funnel plots of the incidence of adverse events.**

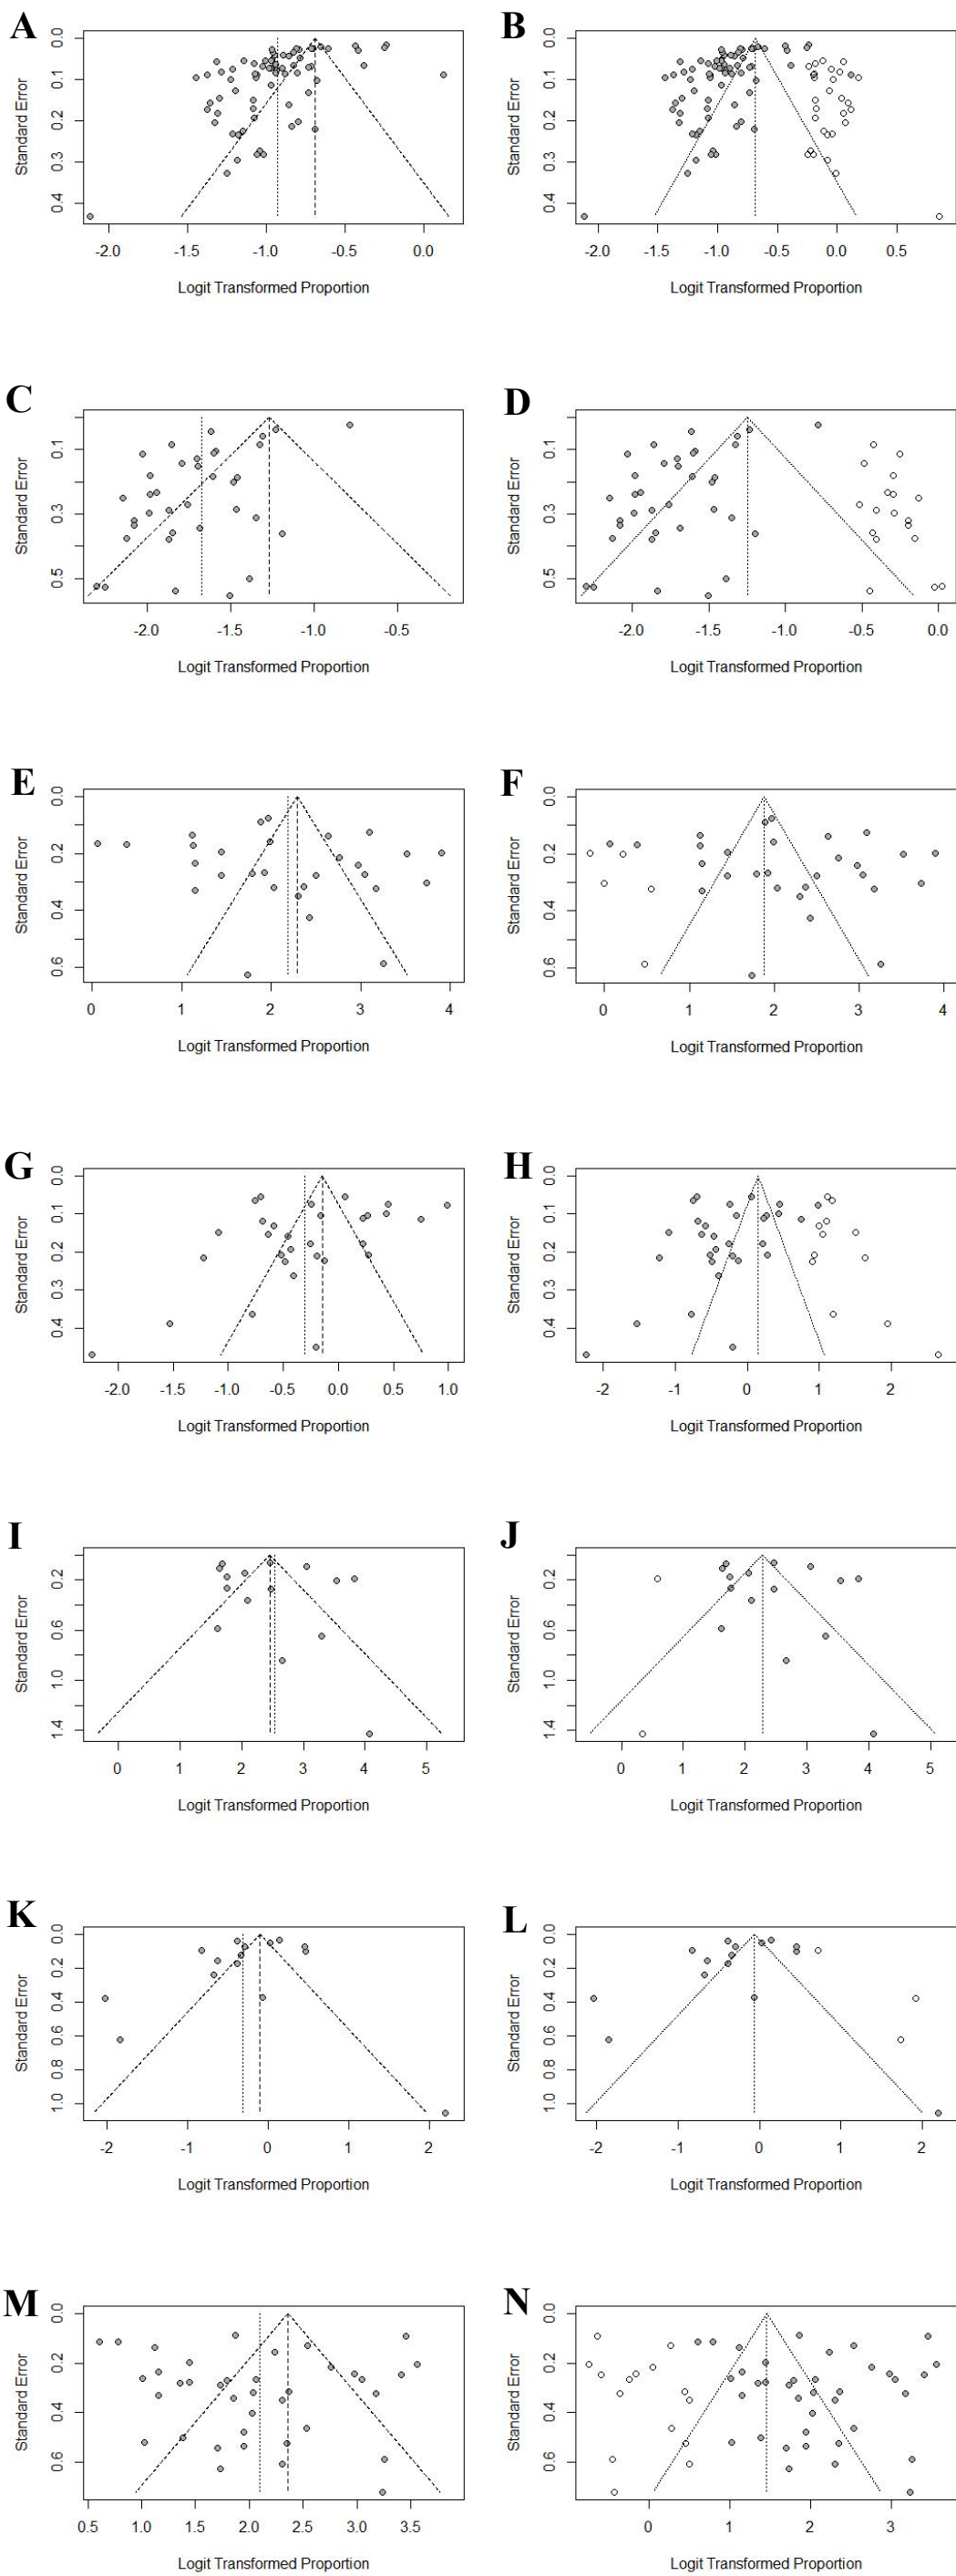

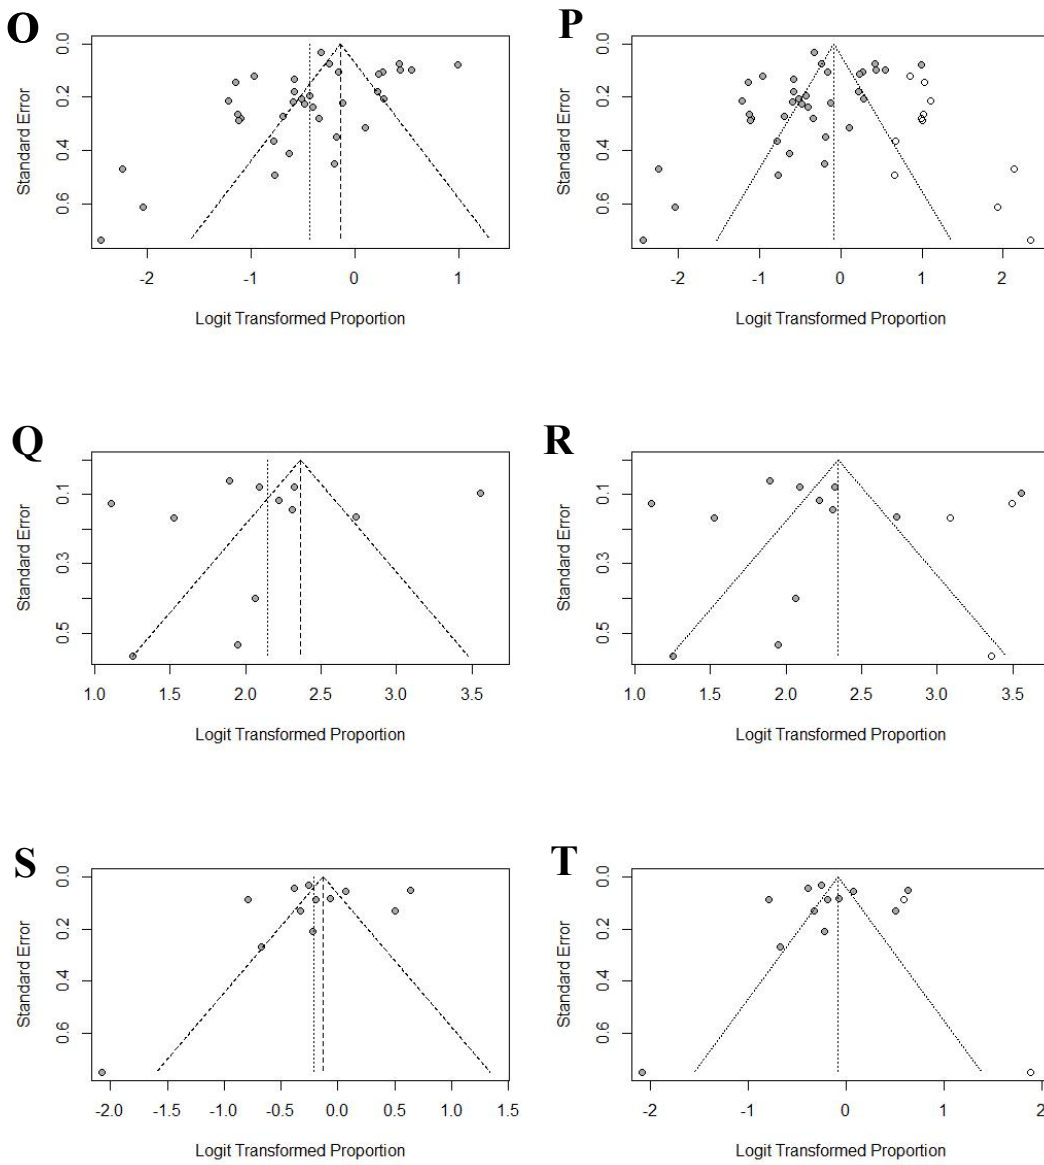

A, Classic funnel plot of logit transformed against standard error in all-grade adverse events. B, Trim-and-fill method to adjusted funnel plot of logit transformed against standard error in all-grade adverse events. C, Classic funnel plot of logit transformed against standard error in grade 3 or higher adverse events. D, Trim-and-fill method to adjusted funnel plot of logit transformed against standard error in grade 3 or higher adverse events. E, Classic funnel plot of logit transformed against standard error in all-grade adverse events of ADCs. F, Trim-and-fill method to adjusted funnel plot of logit transformed against standard error in all-grade adverse events of ADCs. G, Classic funnel plot of logit transformed against standard error in grade 3 or higher adverse events of ADCs. H, Trim-and-fill method to adjusted funnel plot of logit transformed against standard error in grade 3 or higher adverse events of ADCs. I, Classic funnel plot of logit transformed against standard error in all-grade adverse events of payload-conjugates ADCs. J, Trim-and-fill method to adjusted funnel plot of logit transformed against standard error in all-grade adverse events of payload-conjugates ADCs. K, Classic funnel plot of logit transformed against standard error in grade 3 or higher adverse events of payload-conjugates ADCs. L, Trim-and-fill method to adjusted funnel plot of logit transformed against standard error in grade 3 or higher adverse events of payload-conjugates ADCs. M, Classic funnel plot of logit transformed against standard error in all-grade adverse events of anti-target monoclonal antibody ADCs. N, Trim-and-fill method to adjusted funnel plot of logit transformed against standard error in all-grade adverse events of anti-target monoclonal antibody ADCs. O, Classic funnel plot of logit transformed against standard error in grade 3 or higher adverse events of anti-target monoclonal antibody ADCs. P, Trim-and-fill method to adjusted funnel plot of logit transformed against standard error in grade 3 or higher adverse events anti-target monoclonal antibody ADCs. Q, Classic funnel plot of logit transformed against standard error in all-grade adverse events by cancer types. R, Trim-and-fill method to adjusted funnel plot of logit transformed against standard error in all-grade adverse events by cancer types. S Classic funnel plot of logit transformed against standard error in grade 3 or higher adverse events by cancer types. T, Trim-and-fill method to adjusted funnel plot of logit transformed against standard error in grade 3 or higher adverse events by cancer types.

**eFigure 10. Egger's plot of the incidence of adverse events.**

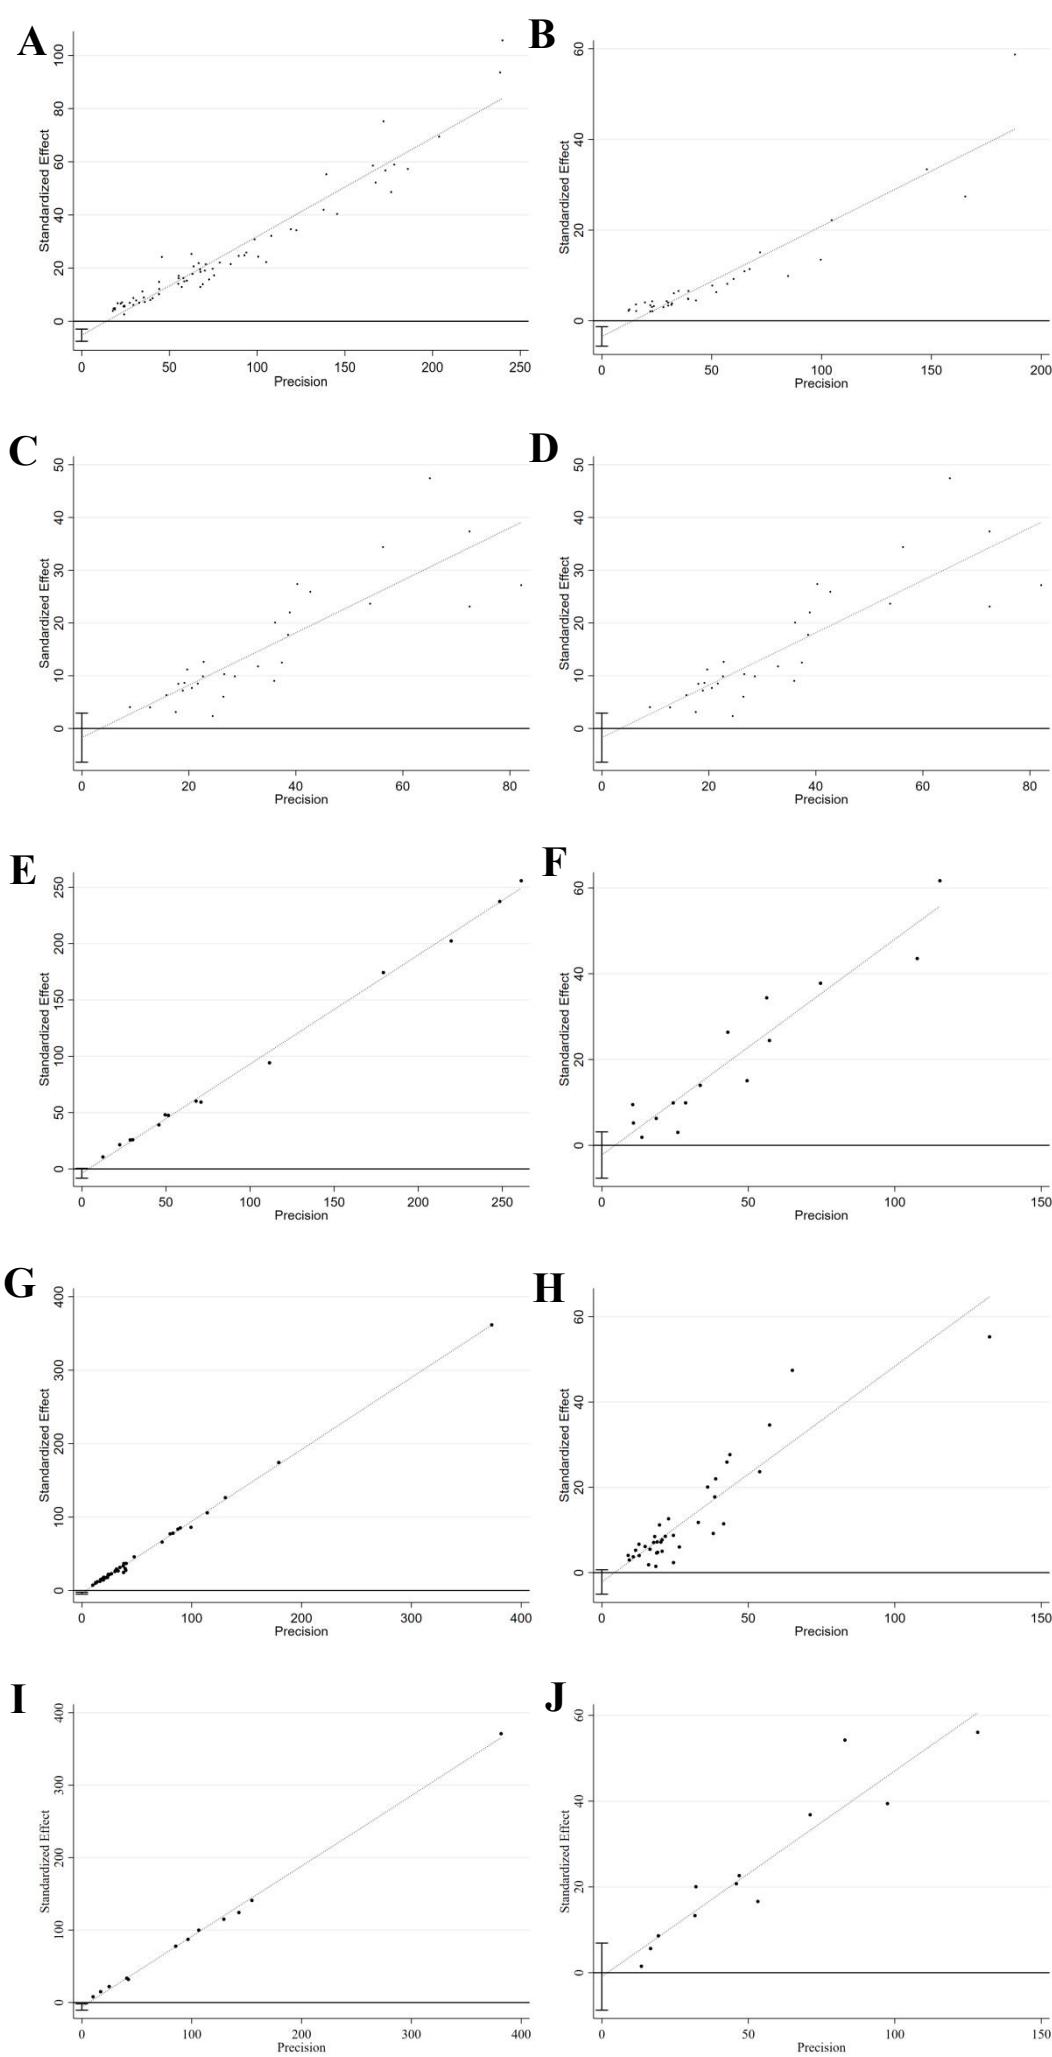

A, Egger's plot of precision against standard error in all-grade adverse events. B, Egger's plot of precision against standard error in grade 3 or higher adverse events. C, Egger's plot of precision against standard error in all-grade adverse events of ADCs. D, Egger's plot of precision against standard error in grade 3 or higher adverse events of ADCs. E, Egger's plot of precision against standard error in all-grade adverse events of payload-conjugates ADCs. F, Egger's plot of precision against standard error in grade 3 or higher adverse events of payload-conjugates ADCs. G, Egger's plot of precision against standard error in all-grade adverse events of anti-target monoclonal antibody ADCs. H, Egger's plot of precision against standard error in grade 3 or higher adverse events of anti-target monoclonal antibody ADCs. I, Egger's plot of precision against standard error in all-grade adverse events of by cancer types. J, Egger's plot of precision against standard error in grade 3 or higher adverse events by cancer types.

## Reference

1. Abraham J, Montero AJ, Jankowitz RC, Salkeni MA, Beumer JH, Kiesel BF, et al. Safety and Efficacy of T-DM1 Plus Neratinib in Patients With Metastatic HER2-Positive Breast Cancer: NSABP Foundation Trial FB-10. *J Clin Oncol*. 2019;37(29):2601-9.
2. Advani RH, Lebovic D, Chen A, Brunvand M, Goy A, Chang JE, et al. Phase I Study of the Anti-CD22 Antibody-Drug Conjugate Pinatuzumab Vedotin with/without Rituximab in Patients with Relapsed/Refractory B-cell Non-Hodgkin Lymphoma. *Clin Cancer Res*. 2017;23(5):1167-76.
3. Ailawadhi S, Kelly KR, Vescio RA, Jagannath S, Wolf J, Gharibo M, et al. A Phase I Study to Assess the Safety and Pharmacokinetics of Single-agent Lorvotuzumab Mertansine (IMGN901) in Patients with Relapsed and/or Refractory CD-56-positive Multiple Myeloma. *Clin Lymphoma Myeloma Leuk*. 2019;19(1):29-34.
4. Almhanna K, Kalebic T, Cruz C, Faris JE, Ryan DP, Jung J, et al. Phase I Study of the Investigational Anti-Guanylyl Cyclase Antibody-Drug Conjugate TAK-264 (MLN0264) in Adult Patients with Advanced Gastrointestinal Malignancies. *Clin Cancer Res*. 2016;22(20):5049-57.
5. Almhanna K, Miron ML, Wright D, Gracian AC, Hubner RA, Van Laethem JL, et al. Phase II study of the antibody-drug conjugate TAK-264 (MLN0264) in patients with metastatic or recurrent adenocarcinoma of the stomach or gastroesophageal junction expressing guanylyl cyclase C. *Invest New Drugs*. 2017;35(2):235-41.
6. Almhanna K, Wright D, Mercade TM, Van Laethem JL, Gracian AC, Guillen-Ponce C, et al. A phase II study of antibody-drug conjugate, TAK-264 (MLN0264) in previously treated patients with advanced or metastatic pancreatic adenocarcinoma expressing guanylyl cyclase C. *Invest New Drugs*. 2017;35(5):634-41.
7. Ashkar R, Feldman DR, Adra N, Zaid MA, Funt SA, Althouse SK, et al. Phase II trial of brentuximab vedotin in relapsed/refractory germ cell tumors. *Invest New Drugs*. 2021;39(6):1656-63.
8. Banerjee S, Oza AM, Birrer MJ, Hamilton EP, Hasan J, Leary A, et al. Anti-NaPi2b antibody-drug conjugate lifastuzumab vedotin (DNIB0600A) compared with pegylated liposomal doxorubicin in patients with platinum-resistant ovarian cancer in a randomized, open-label, phase II study. *Ann Oncol*. 2018;29(4):917-23.
9. Banerji U, van Herpen CML, Saura C, Thistlethwaite F, Lord S, Moreno V, et al. Trastuzumab duocarmazine in locally advanced and metastatic solid tumours and HER2-expressing breast cancer: a phase 1 dose-escalation and dose-expansion study. *Lancet Oncol*. 2019;20(8):1124-35.
10. Bardia A, Mayer IA, Diamond JR, Moroosse RL, Isakoff SJ, Starodub AN, et al. Efficacy and Safety of Anti-Trop-2 Antibody Drug Conjugate Sacituzumab Govitecan (IMMU-132) in Heavily Pretreated Patients With Metastatic Triple-Negative Breast Cancer. *J Clin Oncol*. 2017;35(19):2141-8.
11. Bardia A, Mayer IA, Vahdat LT, Tolaney SM, Isakoff SJ, Diamond JR, et al. Sacituzumab Govitecan-hziy in Refractory Metastatic Triple-Negative Breast Cancer. *N Engl J Med*. 2019;380(8):741-51.
12. Bardia A, Messersmith WA, Kio EA, Berlin JD, Vahdat L, Masters GA, et al. Sacituzumab govitecan, a Trop-2-directed antibody-drug conjugate, for patients with epithelial cancer: final safety and efficacy results from the phase I/II IMMU-132-01 basket trial. *Ann Oncol*. 2021;32(6):746-56.
13. Bardia A, Hurvitz SA, Tolaney SM, Loirat D, Punie K, Oliveira M, et al. Sacituzumab Govitecan in Metastatic Triple-Negative Breast Cancer. *N Engl J Med*. 2021;384(16):1529-41.
14. Bendell J, Saleh M, Rose AA, Siegel PM, Hart L, Sirpal S, et al. Phase I/II study of the antibody-drug conjugate glembatumumab vedotin in patients with locally advanced or metastatic breast cancer. *J Clin Oncol*. 2014;32(32):3619-25.
15. Blackhall F, Jao K, Greillier L, Cho BC, Penkov K, Reguart N, et al. Efficacy and Safety of Rovalpituzumab Tesirine Compared With Topotecan as Second-Line Therapy in DLL3-High SCLC: Results From the Phase 3 TAHOE Study. *J Thorac Oncol*. 2021;16(9):1547-58.
16. Boni V, Fidler MJ, Arkenau HT, Spira A, Meric-Bernstam F, Uboha N, et al. Praluzatamab Ravtansine, a CD166-Targeting Antibody-Drug Conjugate, in Patients with Advanced Solid Tumors: An Open-Label Phase I/II Trial. *Clin Cancer Res*. 2022;28(10):2020-9.
17. Brivio E, Locatelli F, Lopez-Yurda M, Malone A, Díaz-de-Heredia C, Bielgorai B, et al. A phase 1 study of inotuzumab ozogamicin in pediatric relapsed/refractory acute lymphoblastic leukemia (ITCC-059 study). *Blood*. 2021;137(12):1582-90.
18. Burris HA, 3rd, Rugo HS, Vukelja SJ, Vogel CL, Borson RA, Limentani S, et al. Phase II study of the antibody drug conjugate trastuzumab-DM1 for the treatment of human epidermal growth factor receptor 2 (HER2)-positive breast cancer after prior HER2-directed therapy. *J Clin Oncol*. 2011;29(4):398-405.
19. Caimi PF, Ai W, Alderuccio JP, Ardeshtna KM, Hamadani M, Hess B, et al. Loncastuximab tesirine in relapsed or refractory diffuse large B-cell lymphoma

- (LOTIS-2): a multicentre, open-label, single-arm, phase 2 trial. *Lancet Oncol.* 2021;22(6):790-800.
20. Calvo E, Spira A, Miguel M, Kondo S, Gazzah A, Millward M, et al. Safety, pharmacokinetics, and efficacy of budigalimab with rovalpituzumab tesirine in patients with small cell lung cancer. *Cancer Treat Res Commun.* 2021;28:100405.
  21. Camidge DR, Morgensztern D, Heist RS, Barve M, Vokes E, Goldman JW, et al. Phase I Study of 2- or 3-Week Dosing of Telisotuzumab Vedotin, an Antibody-Drug Conjugate Targeting c-Met, Monotherapy in Patients with Advanced Non-Small Cell Lung Carcinoma. *Clin Cancer Res.* 2021;27(21):5781-92.
  22. Cleary JM, Calvo E, Moreno V, Juric D, Shapiro GI, Vanderwal CA, et al. A phase 1 study evaluating safety and pharmacokinetics of losatuxizumab vedotin (ABBV-221), an anti-EGFR antibody-drug conjugate carrying monomethyl auristatin E, in patients with solid tumors likely to overexpress EGFR. *Invest New Drugs.* 2020;38(5):1483-94.
  23. Coiffier B, Thieblemont C, de Guibert S, Dupuis J, Ribrag V, Bouabdallah R, et al. A phase II, single-arm, multicentre study of coltuximab ravtansine (SAR3419) and rituximab in patients with relapsed or refractory diffuse large B-cell lymphoma. *Br J Haematol.* 2016;173(5):722-30.
  24. Coleman RL, Lorusso D, Gennigens C, González-Martín A, Randall L, Cibula D, et al. Efficacy and safety of tisotumab vedotin in previously treated recurrent or metastatic cervical cancer (innovaTV 204/GOG-3023/ENGOT-cx6): a multicentre, open-label, single-arm, phase 2 study. *Lancet Oncol.* 2021;22(5):609-19.
  25. Cortés J, Kim SB, Chung WP, Im SA, Park YH, Hegg R, et al. Trastuzumab Deruxtecan versus Trastuzumab Emtansine for Breast Cancer. *N Engl J Med.* 2022;386(12):1143-54.
  26. Coveler AL, Ko AH, Catenacci DV, Von Hoff D, Becerra C, Whiting NC, et al. A phase 1 clinical trial of ASG-5ME, a novel drug-antibody conjugate targeting SLC44A4, in patients with advanced pancreatic and gastric cancers. *Invest New Drugs.* 2016;34(3):319-28.
  27. Dang NH, Ogura M, Castaigne S, Fayad LE, Jerkeman M, Radford J, et al. Randomized, phase 3 trial of inotuzumab ozogamicin plus rituximab versus chemotherapy plus rituximab for relapsed/refractory aggressive B-cell non-Hodgkin lymphoma. *Br J Haematol.* 2018;182(4):583-6.
  28. Danila DC, Szmulewitz RZ, Vaishampayan U, Higano CS, Baron AD, Gilbert HN, et al. Phase I Study of DSTP3086S, an Antibody-Drug Conjugate Targeting Six-Transmembrane Epithelial Antigen of Prostate 1, in Metastatic Castration-Resistant Prostate Cancer. *J Clin Oncol.* 2019;37(36):3518-27.
  29. Daver N, Salhotra A, Brandwein JM, Podoltsev NA, Pollyea DA, Jurcic JG, et al. A Phase I dose-escalation study of DCLL9718S, an antibody-drug conjugate targeting C-type lectin-like molecule-1 (CLL-1) in patients with acute myeloid leukemia. *Am J Hematol.* 2021;96(5):E175-e9.
  30. de Bono JS, Concin N, Hong DS, Thistlethwaite FC, Machiels JP, Arkenau HT, et al. Tisotumab vedotin in patients with advanced or metastatic solid tumours (InnovaTV 201): a first-in-human, multicentre, phase 1-2 trial. *Lancet Oncol.* 2019;20(3):383-93.
  31. de Bono JS, Fleming MT, Wang JS, Cathomas R, Miralles MS, Bothos J, et al. Phase I Study of MEDI3726: A Prostate-Specific Membrane Antigen-Targeted Antibody-Drug Conjugate, in Patients with mCRPC after Failure of Abiraterone or Enzalutamide. *Clin Cancer Res.* 2021;27(13):3602-9.
  32. Demetri GD, Luke JJ, Hollebecque A, Powderly JD, 2nd, Spira AI, Subbiah V, et al. First-in-Human Phase I Study of ABBV-085, an Antibody-Drug Conjugate Targeting LRRC15, in Sarcomas and Other Advanced Solid Tumors. *Clin Cancer Res.* 2021;27(13):3556-66.
  33. Doi T, Shitara K, Naito Y, Shimomura A, Fujiwara Y, Yonemori K, et al. Safety, pharmacokinetics, and antitumour activity of trastuzumab deruxtecan (DS-8201), a HER2-targeting antibody-drug conjugate, in patients with advanced breast and gastric or gastro-oesophageal tumours: a phase 1 dose-escalation study. *Lancet Oncol.* 2017;18(11):1512-22.
  34. Dotan E, Cohen SJ, Starodub AN, Lieu CH, Messersmith WA, Simpson PS, et al. Phase I/II Trial of Labetuzumab Govitecan (Anti-CEACAM5/SN-38 Antibody-Drug Conjugate) in Patients With Refractory or Relapsing Metastatic Colorectal Cancer. *J Clin Oncol.* 2017;35(29):3338-46.
  35. Eichenauer DA, Plütschow A, Kreissl S, Sökler M, Hellmuth JC, Meissner J, et al. Incorporation of brentuximab vedotin into first-line treatment of advanced classical Hodgkin's lymphoma: final analysis of a phase 2 randomised trial by the German Hodgkin Study Group. *Lancet Oncol.* 2017;18(12):1680-7.
  36. Fanale MA, Forero-Torres A, Rosenblatt JD, Advani RH, Franklin AR, Kennedy DA, et al. A phase I weekly dosing study of brentuximab vedotin in patients with relapsed/refractory CD30-positive hematologic malignancies. *Clin Cancer Res.* 2012;18(1):248-55.

37. Forero-Torres A, Holkova B, Goldschmidt J, Chen R, Olsen G, Boccia RV, et al. Phase 2 study of frontline brentuximab vedotin monotherapy in Hodgkin lymphoma patients aged 60 years and older. *Blood*. 2015;126(26):2798-804.
38. Forero-Torres A, Kolibaba KS, Lamy T, Jones S, Lee C, Sharman J. Polatuzumab vedotin combined with obinutuzumab, cyclophosphamide, doxorubicin, and prednisone (G-CHP) for patients with previously untreated diffuse large B-cell lymphoma (DLBCL): preliminary results of a phase Ib/II dose-escalation study. *Blood Conference: 58th annual meeting of the american society of hematology, ASH 2016 United states Conference start: 20161203 Conference end: 20161206*. 2016;128(22) (no pagination).
39. Garrido-Laguna I, Krop I, Burris HA, 3rd, Hamilton E, Braiteh F, Weise AM, et al. First-in-human, phase I study of PF-06647263, an anti-EFNA4 calicheamicin antibody-drug conjugate, in patients with advanced solid tumors. *Int J Cancer*. 2019;145(7):1798-808.
40. Geller JI, Pressey JG, Smith MA, Kudgus RA, Cajaiba M, Reid JM, et al. ADVL1522: A phase 2 study of lorvotuzumab mertansine (IMGN901) in children with relapsed or refractory wilms tumor, rhabdomyosarcoma, neuroblastoma, pleuropulmonary blastoma, malignant peripheral nerve sheath tumor, or synovial sarcoma-A Children's Oncology Group study. *Cancer*. 2020;126(24):5303-10.
41. Gerber DE, Infante JR, Gordon MS, Goldberg SB, Martín M, Felip E, et al. Phase Ia Study of Anti-NaPi2b Antibody-Drug Conjugate Lifestuzumab Vedotin DNIB0600A in Patients with Non-Small Cell Lung Cancer and Platinum-Resistant Ovarian Cancer. *Clin Cancer Res*. 2020;26(2):364-72.
42. Goldberg AD, Atallah E, Rizzieri D, Walter RB, Chung KY, Spira A, et al. Camidanlumab tesirine, an antibody-drug conjugate, in relapsed/refractory CD25-positive acute myeloid leukemia or acute lymphoblastic leukemia: A phase I study. *Leuk Res*. 2020;95:106385.
43. Goss GD, Vokes EE, Gordon MS, Gandhi L, Papadopoulos KP, Rasco DW, et al. Efficacy and safety results of depatuzumab mafodotin (ABT-414) in patients with advanced solid tumors likely to overexpress epidermal growth factor receptor. *Cancer*. 2018;124(10):2174-83.
44. Gray JE, Heist RS, Starodub AN, Camidge DR, Kio EA, Masters GA, et al. Therapy of Small Cell Lung Cancer (SCLC) with a Topoisomerase-I-inhibiting Antibody-Drug Conjugate (ADC) Targeting Trop-2, Sacituzumab Govitecan. *Clin Cancer Res*. 2017;23(19):5711-9.
45. Hamadani M, Radford J, Carlo-Stella C, Caimi PF, Reid E, O'Connor OA, et al. Final results of a phase 1 study of loncastuximab tesirine in relapsed/refractory B-cell non-Hodgkin lymphoma. *Blood*. 2021;137(19):2634-45.
46. Hamadani M, Collins GP, Caimi PF, Samaniego F, Spira A, Davies A, et al. Camidanlumab tesirine in patients with relapsed or refractory lymphoma: a phase 1, open-label, multicentre, dose-escalation, dose-expansion study. *Lancet Haematol*. 2021;8(6):e433-e45.
47. Hamilton E, O'Malley DM, O'Cearbhaill R, Cristea M, Fleming GF, Tariq B, et al. Tamrintamab pamoizine (SC-003) in patients with platinum-resistant/refractory ovarian cancer: Findings of a phase 1 study. *Gynecol Oncol*. 2020;158(3):640-5.
48. Hann CL, Burns TF, Dowlati A, Morgensztern D, Ward PJ, Koch MM, et al. A Phase 1 Study Evaluating Rovalpituzumab Tesirine in Frontline Treatment of Patients With Extensive-Stage SCLC. *J Thorac Oncol*. 2021;16(9):1582-8.
49. Hassan R, Blumenschein GR, Jr., Moore KN, Santin AD, Kindler HL, Nemunaitis JJ, et al. First-in-Human, Multicenter, Phase I Dose-Escalation and Expansion Study of Anti-Mesothelin Antibody-Drug Conjugate Anetumab Ravtansine in Advanced or Metastatic Solid Tumors. *J Clin Oncol*. 2020;38(16):1824-35.
50. Heist RS, Guarino MJ, Masters G, Purcell WT, Starodub AN, Horn L, et al. Therapy of Advanced Non-Small-Cell Lung Cancer With an SN-38-Anti-Trop-2 Drug Conjugate, Sacituzumab Govitecan. *J Clin Oncol*. 2017;35(24):2790-7.
51. Herrera AF, Carlo-Stella C, Collins GP, Maddocks KJ, Bartlett NL, Savage KJ, et al. Preliminary results of a phase 2 study of camidanlumab tesirine (CAMI), a novel pyrrolobenzodiazepine-based antibody-drug conjugate, in patients with relapsed or refractory hodgkin lymphoma. *Blood*. 2020;136(SUPPL 1):21-3.
52. Herrera AF, Patel MR, Burke JM, Advani R, Cheson BD, Sharman JP, et al. Anti-CD79B Antibody-Drug Conjugate DCDS0780A in Patients with B-Cell Non-Hodgkin Lymphoma: Phase 1 Dose-Escalation Study. *Clin Cancer Res*. 2022;28(7):1294-301.
53. Hong R, Xia W, Wang L, Lee K, Lu Q, Jiang K, et al. Safety, tolerability, and pharmacokinetics of BAT8001 in patients with HER2-positive breast cancer: An open-label, dose-escalation, phase I study. *Cancer Commun (Lond)*. 2021;41(2):171-82.
54. Horwitz SM, Advani RH, Bartlett NL, Jacobsen ED, Sharman JP, O'Connor OA, et al. Objective responses in relapsed T-cell lymphomas with single-agent brentuximab vedotin. *Blood*. 2014;123(20):3095-100.

55. Horwitz S, O'Connor OA, Pro B, Illidge T, Fanale M, Advani R, et al. Brentuximab vedotin with chemotherapy for CD30-positive peripheral T-cell lymphoma (ECHELON-2): a global, double-blind, randomised, phase 3 trial. *Lancet*. 2019;393(10168):229-40.
56. Hotta K, Aoe K, Kozuki T, Ohashi K, Ninomiya K, Ichihara E, et al. A Phase II Study of Trastuzumab Emtansine in HER2-Positive Non-Small Cell Lung Cancer. *J Thorac Oncol*. 2018;13(2):273-9.
57. Hurvitz SA, Dirix L, Kocsis J, Bianchi GV, Lu J, Vinholes J, et al. Phase II randomized study of trastuzumab emtansine versus trastuzumab plus docetaxel in patients with human epidermal growth factor receptor 2-positive metastatic breast cancer. *J Clin Oncol*. 2013;31(9):1157-63.
58. Jacobsen ED, Sharman JP, Oki Y, Advani RH, Winter JN, Bello CM, et al. Brentuximab vedotin demonstrates objective responses in a phase 2 study of relapsed/refractory DLBCL with variable CD30 expression. *Blood*. 2015;125(9):1394-402.
59. Jain N, Stock W, Zeidan A, Atallah E, McCloskey J, Heffner L, et al. Loncastuximab tesirine, an anti-CD19 antibody-drug conjugate, in relapsed/refractory B-cell acute lymphoblastic leukemia. *Blood Adv*. 2020;4(3):449-57.
60. Janne PA, Baik C, Su W-C, Johnson ML, Hayashi H, Nishio M, et al. Efficacy and Safety of Patritumab Deruxtecan (HER3-DXd) in EGFR Inhibitor-Resistant, EGFR-Mutated Non-Small Cell Lung Cancer. *Cancer Discovery*. 2022;12(1):74-89.
61. Ji D, Shen W, Zhang J, Cao J, Li W, Lam LH, et al. A phase I study of pharmacokinetics of trastuzumab emtansine in Chinese patients with locally advanced inoperable or metastatic human epidermal growth factor receptor 2-positive breast cancer who have received prior trastuzumab-based therapy. *Medicine (Baltimore)*. 2020;99(44):e22886.
62. Johnson M, El-Khoueiry A, Hafez N, Lakhani N, Mamdani H, Rodon J, et al. Phase I, First-in-Human Study of the Probody Therapeutic CX-2029 in Adults with Advanced Solid Tumor Malignancies. *Clin Cancer Res*. 2021;27(16):4521-30.
63. Johnson ML, Zvirbule Z, Laktionov K, Helland A, Cho BC, Gutierrez V, et al. Rovalpituzumab Tesirine as a Maintenance Therapy After First-Line Platinum-Based Chemotherapy in Patients With Extensive-Stage-SCLC: results From the Phase 3 MERU Study. *Journal of thoracic oncology*. 2021;16(9):1570-81.
64. Kalinsky K, Diamond JR, Vahdat LT, Tolaney SM, Juric D, O'Shaughnessy J, et al. Sacituzumab govitecan in previously treated hormone receptor-positive/HER2-negative metastatic breast cancer: final results from a phase I/II, single-arm, basket trial. *Annals of Oncology*. 2020;31(12):1709-18.
65. Kantarjian HM, Lioure B, Kim SK, Atallah E, Leguay T, Kelly K, et al. A Phase II Study of Coltuximab Ravtansine (SAR3419) Monotherapy in Patients With Relapsed or Refractory Acute Lymphoblastic Leukemia. *Clin Lymphoma Myeloma Leuk*. 2016;16(3):139-45.
66. Kantarjian HM, DeAngelo DJ, Stelljes M, Liedtke M, Stock W, Gökbüget N, et al. Inotuzumab ozogamicin versus standard of care in relapsed or refractory acute lymphoblastic leukemia: final report and long-term survival follow-up from the randomized, phase 3 INO-VATE study. *Cancer*. 2019;125(14):2474-87.
67. Kashiwaba M, Ito Y, Takao S, Doihara H, Rai Y, Kanatani K, et al. A multicenter Phase II study evaluating the efficacy, safety and pharmacokinetics of trastuzumab emtansine in Japanese patients with heavily pretreated HER2-positive locally recurrent or metastatic breast cancer. *Japanese Journal of Clinical Oncology*. 2016;46(5):407-14.
68. Kelly KR, Ailawadhi S, Siegel DS, Heffner LT, Somlo G, Jagannath S, et al. Indatuximab ravtansine plus dexamethasone with lenalidomide or pomalidomide in relapsed or refractory multiple myeloma: a multicentre, phase 1/2a study. *Lancet Haematol*. 2021;8(11):e794-e807.
69. Khan SA, Sun Z, Dahlberg S, Malhotra J, Keresztes R, Ikpeazu C, et al. Efficacy and Safety of Glematumumab Vedotin in Patients With Advanced or Metastatic Squamous Cell Carcinoma of the Lung (PrECOG 0504). *JTO Clin Res Rep*. 2021;2(5):100166.
70. Kim YH, Tavallae M, Sundram U, Salva KA, Wood GS, Li S, et al. Phase II Investigator-Initiated Study of Brentuximab Vedotin in Mycosis Fungoides and Sézary Syndrome With Variable CD30 Expression Level: A Multi-Institution Collaborative Project. *J Clin Oncol*. 2015;33(32):3750-8.
71. Kim YH, Prince HM, Horwitz SM, Dummer R, Scarisbrick J, Quaglino P, et al. Brentuximab vedotin or physician's choice in CD30-positive cutaneous T-cell lymphoma (ALCANZA): an international, open-label, randomised, phase 3, multicentre trial. *Lancet*. 2017;390(10094):555-66.
72. Kim SB, Meric-Bernstam F, Kalyan A, Babich A, Liu R, Tanigawa T, et al. First-in-Human Phase I Study of Aprutumab Ixadotin, a Fibroblast Growth Factor Receptor 2 Antibody-Drug Conjugate (BAY 1187982) in Patients with Advanced Cancer. *Target Oncol*. 2019;14(5):591-601.
73. Kindler HL, Novello S, Bearz A, Ceresoli GL, Aerts J, Spicer J, et al. Anetumab ravtansine versus vinorelbine in patients with relapsed, mesothelin-positive malignant



- pleural mesothelioma (ARCS-M): a randomised, open-label phase 2 trial. *The Lancet Oncology*. 2022;23(4):540-52.
74. King GT, Eaton KD, Beagle BR, Zopf CJ, Wong GY, Krupka HI, et al. A phase 1, dose-escalation study of PF-06664178, an anti-Trop-2/Aur0101 antibody-drug conjugate in patients with advanced or metastatic solid tumors. *Invest New Drugs*. 2018;36(5):836-47.
75. Kollmannsberger C, Choueiri TK, Heng DYC, George S, Jie F, Croitoru R, et al. A Randomized Phase II Study of AGS-16C3F Versus Axitinib in Previously Treated Patients with Metastatic Renal Cell Carcinoma. *Oncologist*. 2021;26(3):182-e361.
76. Kollmannsberger C, Britten CD, Olszanski AJ, Walker JA, Zang W, Willard MD, et al. A phase 1 study of LY3076226, a fibroblast growth factor receptor 3 (FGFR3) antibody-drug conjugate, in patients with advanced or metastatic cancer. *Invest New Drugs*. 2021;39(6):1613-23.
77. Kopp LM, Malempati S, Krailo M, Gao Y, Buxton A, Weigel BJ, et al. Phase II trial of the glycoprotein non-metastatic B-targeted antibody-drug conjugate, glembatumumab vedotin (CDX-011), in recurrent osteosarcoma AOST1521: A report from the Children's Oncology Group. *Eur J Cancer*. 2019;121:177-83.
78. Krop IE, LoRusso P, Miller KD, Modi S, Yardley D, Rodriguez G, et al. A phase II study of trastuzumab emtansine in patients with human epidermal growth factor receptor 2-positive metastatic breast cancer who were previously treated with trastuzumab, lapatinib, an anthracycline, a taxane, and capecitabine. *Journal of Clinical Oncology*. 2012;30(26):3234-41.
79. Krop IE, Suter TM, Dang CT, Dirix L, Romieu G, Zamagni C, et al. Feasibility and cardiac safety of trastuzumab emtansine after anthracycline-based chemotherapy as (neo)adjuvant therapy for human epidermal growth factor receptor 2-positive early-stage breast cancer. *J Clin Oncol*. 2015;33(10):1136-42.
80. Krop IE, Kim SB, Martin AG, LoRusso PM, Ferrero JM, Badovinac-Crnjevic T, et al. Trastuzumab emtansine versus treatment of physician's choice in patients with previously treated HER2-positive metastatic breast cancer (TH3RESA): final overall survival results from a randomised open-label phase 3 trial. *Lancet Oncol*. 2017;18(6):743-54.
81. Lassman AB, van den Bent MJ, Gan HK, Reardon DA, Kumthekar P, Butowski N, et al. Safety and efficacy of deparuzumab mafodotin + temozolomide in patients with EGFR-amplified, recurrent glioblastoma: results from an international phase I multicenter trial. *Neuro-oncology*. 2019;21(1):106-14.
82. Lemech C, Woodward N, Chan N, Mortimer J, Naumovski L, Nuthalapati S, et al. A first-in-human, phase 1, dose-escalation study of ABBV-176, an antibody-drug conjugate targeting the prolactin receptor, in patients with advanced solid tumors. *Invest New Drugs*. 2020;38(6):1815-25.
83. Li BT, Shen R, Buonocore D, Olah ZT, Ni A, Ginsberg MS, et al. Ado-Trastuzumab Emtansine for Patients With HER2-Mutant Lung Cancers: Results From a Phase II Basket Trial. *J Clin Oncol*. 2018;36(24):2532-7.
84. Li BT, Li BT, Smit EF, Goto Y, Nakagawa K, Udagawa H, et al. Trastuzumab deruxtecan in HER2-mutant non-small-cell lung cancer. *New England Journal of Medicine*. 2022;386(3):241-51.
85. Liu JF, Moore KN, Birrer MJ, Berlin S, Matulonis UA, Infante JR, et al. Phase I study of safety and pharmacokinetics of the anti-MUC16 antibody-drug conjugate DMUC5754A in patients with platinum-resistant ovarian cancer or unresectable pancreatic cancer. *Ann Oncol*. 2016;27(11):2124-30.
86. Liu J, Burris H, Wang JS, Barroilhet L, Gutierrez M, Wang Y, et al. An open-label phase I dose-escalation study of the safety and pharmacokinetics of DMUC4064A in patients with platinum-resistant ovarian cancer. *Gynecol Oncol*. 2021;163(3):473-80.
87. Lonial S, Lee HC, Badros A, Trudel S, Nooka AK, Chari A, et al. Longer term outcomes with single-agent belantamab mafodotin in patients with relapsed or refractory multiple myeloma: 13-month follow-up from the pivotal DREAMM-2 study. *Cancer*. 2021;127(22):4198-212.
88. Loriot Y, Tagawa ST, Balar AV, Petrylak DP, Kalebasty AR, Fléchon A, et al. TROPHY-U-01: A Phase II Open-Label Study of Sacituzumab Govitecan in Patients With Metastatic Urothelial Carcinoma Progressing After Platinum-Based Chemotherapy and Checkpoint Inhibitors. *J Clin Oncol*. 2021;39(22):2474-85.
89. Lynch RC, Cassaday RD, Smith SD, Fromm JR, Cowan AJ, Warren EH, et al. Dose-dense brentuximab vedotin plus ifosfamide, carboplatin, and etoposide for second-line treatment of relapsed or refractory classical Hodgkin lymphoma: a single centre, phase 1/2 study. *Lancet Haematol*. 2021;8(8):e562-e71.
90. Maitland ML, Sachdev JC, Sharma MR, Moreno V, Boni V, Kummar S, et al. First-in-Human Study of PF-06647020 (Cofetuzumab Pelidotin), an Antibody-Drug Conjugate Targeting Protein Tyrosine Kinase 7, in Advanced Solid Tumors. *Clin Cancer Res*. 2021;27(16):4511-20.
91. Malhotra J, Nikolidakos P, Leal T, Lehman J, Morgensztern D, Patel JD, et al. A Phase 1-2 Study of Rovalpituzumab Tesirine in Combination With Nivolumab Plus or

- Minus Ipilimumab in Patients With Previously Treated Extensive-Stage SCLC. *J Thorac Oncol.* 2021;16(9):1559-69.
92. Mansfield AS, Hong DS, Hann CL, Farago AF, Beltran H, Waqar SN, et al. A phase I/II study of rovalpituzumab tesirine in delta-like 3-expressing advanced solid tumors. *NPJ Precis Oncol.* 2021;5(1):74.
93. Medeiros BC, Tanaka TN, Balaian L, Bashey A, Guzdar A, Li H, et al. A Phase I/II Trial of the Combination of Azacitidine and Gemtuzumab Ozogamicin for Treatment of Relapsed Acute Myeloid Leukemia. *Clin Lymphoma Myeloma Leuk.* 2018;18(5):346-52.e5.
94. Modi S, Park H, Murthy RK, Iwata H, Tamura K, Tsurutani J, et al. Antitumor activity and safety of trastuzumab deruxtecan in patients with HER2-low-expressing advanced breast cancer: Results from a phase Ib study. *Journal of Clinical Oncology.* 2020;38(17):1887-96.
95. Modi S, Saura C, Yamashita T, Park YH, Kim S-B, Tamura K, et al. Trastuzumab Deruxtecan in Previously Treated HER2-Positive Breast Cancer. *New England Journal of Medicine.* 2020;382(7):610-21.
96. Modi S, Jacot W, Yamashita T, Sohn J, Vidal M, Tokunaga E, et al. Trastuzumab Deruxtecan in Previously Treated HER2-Low Advanced Breast Cancer. *N Engl J Med.* 2022;387(1):9-20.
97. Moore KN, O'Malley DM, Vergote I, Martin LP, Gonzalez-Martin A, Malek K, et al. Safety and activity findings from a phase 1b escalation study of mirvetuximab soravtansine, a folate receptor alpha (FR $\alpha$ )-targeting antibody-drug conjugate (ADC), in combination with carboplatin in patients with platinum-sensitive ovarian cancer. *Gynecol Oncol.* 2018;151(1):46-52.
98. Moore KN, Birrer MJ, Marsters J, Wang Y, Choi Y, Royer-Joo S, et al. Phase 1b study of anti-NaPi2b antibody-drug conjugate lifastuzumab vedotin (DNIB0600A) in patients with platinum-sensitive recurrent ovarian cancer. *Gynecol Oncol.* 2020;158(3):631-9.
99. Moore KN, Oza AM, Colombo N, Oaknin A, Scambia G, Lorusso D, et al. Phase III, randomized trial of mirvetuximab soravtansine versus chemotherapy in patients with platinum-resistant ovarian cancer: primary analysis of FORWARD I. *Annals of Oncology.* 2021;32(6):757-65.
100. Morgensztern D, Besse B, Greillier L, Santana-Davila R, Ready N, Hann CL, et al. Efficacy and Safety of Rovalpituzumab Tesirine in Third-Line and Beyond Patients with DLL3-Expressing, Relapsed/Refractory Small-Cell Lung Cancer: Results From the Phase II TRINITY Study. *Clin Cancer Res.* 2019;25(23):6958-66.
101. Morgensztern D, Johnson M, Rudin CM, Rossi M, Lazarov M, Brickman D, et al. SC-002 in patients with relapsed or refractory small cell lung cancer and large cell neuroendocrine carcinoma: Phase 1 study. *Lung Cancer.* 2020;145:126-31.
102. Morschhauser F, Flinn IW, Advani R, Sehn LH, Diefenbach C, Kolibaba K, et al. Polatuzumab vedotin or pinatuzumab vedotin plus rituximab in patients with relapsed or refractory non-Hodgkin lymphoma: final results from a phase 2 randomised study (ROMULUS). *Lancet Haematol.* 2019;6(5):e254-e65.
103. Narayan R, Blonquist TM, Emadi A, Hasserjian RP, Burke M, Lescinskas C, et al. A phase 1 study of the antibody-drug conjugate brentuximab vedotin with re-induction chemotherapy in patients with CD30-expressing relapsed/refractory acute myeloid leukemia. *Cancer.* 2020;126(6):1264-73.
104. Narita Y, Muragaki Y, Kagawa N, Asai K, Nagane M, Matsuda M, et al. Safety and efficacy of depatuxizumab mafodotin in Japanese patients with malignant glioma: a nonrandomized, phase 1/2 trial. *Cancer science.* 2021;112(12):5020-33.
105. O'Brien MM, Ji L, Shah NN, Rheingold SR, Bhojwani D, Yi JS, et al. A Phase 2 Trial of Inotuzumab Ozogamicin (InO) in Children and Young Adults with Relapsed or Refractory (R/R) CD22+ B-Acute Lymphoblastic Leukemia (B-ALL): results from Children's Oncology Group Protocol AALL1621. *Blood.* 2019;134:741-.
106. Ogura M, Tobinai K, Hatake K, Ishizawa K, Uike N, Uchida T, et al. Phase I / II study of brentuximab vedotin in Japanese patients with relapsed or refractory CD30-positive Hodgkin's lymphoma or systemic anaplastic large-cell lymphoma. *Cancer Sci.* 2014;105(7):840-6.
107. O'Malley DM, Matulonis UA, Birrer MJ, Castro CM, Gilbert L, Vergote I, et al. Phase Ib study of mirvetuximab soravtansine, a folate receptor alpha (FR $\alpha$ )-targeting antibody-drug conjugate (ADC), in combination with bevacizumab in patients with platinum-resistant ovarian cancer. *Gynecol Oncol.* 2020;157(2):379-85.
108. Ott PA, Hamid O, Pavlick AC, Kluger H, Kim KB, Boasberg PD, et al. Phase I/II study of the antibody-drug conjugate glembatumumab vedotin in patients with advanced melanoma. *J Clin Oncol.* 2014;32(32):3659-66.
109. Ott PA, Pavlick AC, Johnson DB, Hart LL, Infante JR, Luke JJ, et al. A phase 2 study of glembatumumab vedotin, an antibody-drug conjugate targeting glycoprotein NMB, in patients with advanced melanoma. *Cancer.* 2019;125(7):1113-23.
110. Owonikoko TK, Hussain A, Stadler WM, Smith DC, Kluger H, Molina AM, et al. First-in-human multicenter phase I study of BMS-936561 (MDX-1203), an

- antibody-drug conjugate targeting CD70. *Cancer Chemother Pharmacol*. 2016;77(1):155-62.
111. Ozcan M, Cassaday RD, Singh P, Zarzycka E, Zhang X, Negre E, et al. The Efficacy and Safety of Low-Dose Inotuzumab Ozogamicin in Patients with Relapsed or Refractory Acute Lymphoblastic Leukemia: interim Results of a Phase 4 Study. *Blood*. 2021;138:1208-.
112. Pal SK, Forero-Torres A, Thompson JA, Morris JC, Chhabra S, Hoimes CJ, et al. A phase 1 trial of SGN-CD70A in patients with CD70-positive, metastatic renal cell carcinoma. *Cancer*. 2019;125(7):1124-32.
113. Palanca-Wessels MC, Czuczman M, Salles G, Assouline S, Sehn LH, Flinn I, et al. Safety and activity of the anti-CD79B antibody-drug conjugate polatuzumab vedotin in relapsed or refractory B-cell non-Hodgkin lymphoma and chronic lymphocytic leukaemia: a phase 1 study. *Lancet Oncol*. 2015;16(6):704-15.
114. Pegram MD, Hamilton EP, Tan AR, Storniolo AM, Balic K, Rosenbaum AI, et al. First-in-Human, Phase 1 Dose-Escalation Study of Biparatopic Anti-HER2 Antibody-Drug Conjugate MEDI4276 in Patients with HER2-positive Advanced Breast or Gastric Cancer. *Mol Cancer Ther*. 2021;20(8):1442-53.
115. Peng Z, Liu T, Wei J, Wang A, He Y, Yang L, et al. Efficacy and safety of a novel anti-HER2 therapeutic antibody RC48 in patients with HER2-overexpressing, locally advanced or metastatic gastric or gastroesophageal junction cancer: a single-arm phase II study. *Cancer Communications*. 2021;41(11):1173-82.
116. Perez EA, Barrios C, Eiermann W, Toi M, Im Y-H, Conte P, et al. Trastuzumab Emtansine With or Without Pertuzumab Versus Trastuzumab Plus Taxane for Human Epidermal Growth Factor Receptor 2-Positive, Advanced Breast Cancer: Primary Results From the Phase III MARIANNE Study. *Journal of Clinical Oncology*. 2017;35(2):141-+.
117. Peters S, Stahel R, Bubendorf L, Bonomi P, Villegas A, Kowalski DM, et al. Trastuzumab Emtansine (T-DM1) in Patients with Previously Treated HER2-Overexpressing Metastatic Non-Small Cell Lung Cancer: Efficacy, Safety, and Biomarkers. *Clin Cancer Res*. 2019;25(1):64-72.
118. Petrylak DP, Kantoff P, Vogelzang NJ, Mega A, Fleming MT, Stephenson JJ, Jr., et al. Phase 1 study of PSMA ADC, an antibody-drug conjugate targeting prostate-specific membrane antigen, in chemotherapy-refractory prostate cancer. *Prostate*. 2019;79(6):604-13.
119. Ribrag V, Dupuis J, Tilly H, Morschhauser F, Laine F, Houot R, et al. A dose-escalation study of SAR3419, an anti-CD19 antibody maytansinoid conjugate, administered by intravenous infusion once weekly in patients with relapsed/refractory B-cell non-Hodgkin lymphoma. *Clin Cancer Res*. 2014;20(1):213-20.
120. Rosen LS, Wesolowski R, Baffa R, Liao KH, Hua SY, Gibson BL, et al. A phase I, dose-escalation study of PF-06650808, an anti-Notch3 antibody-drug conjugate, in patients with breast cancer and other advanced solid tumors. *Invest New Drugs*. 2020;38(1):120-30.
121. Rosenberg JE, O'Donnell PH, Balar AV, McGregor BA, Heath EI, Yu EY, et al. Pivotal Trial of Enfortumab Vedotin in Urothelial Carcinoma After Platinum and Anti-Programmed Death 1/Programmed Death Ligand 1 Therapy. *Journal of Clinical Oncology*. 2019;37(29):2592-+.
122. Rosenberg J, Sridhar SS, Zhang J, Smith D, Ruether D, Flaig TW, et al. EV-101: A Phase I Study of Single-Agent Enfortumab Vedotin in Patients With Nectin-4-Positive Solid Tumors, Including Metastatic Urothelial Carcinoma. *J Clin Oncol*. 2020;38(10):1041-9.
123. Rosenthal M, Curry R, Reardon DA, Rasmussen E, Upreti VV, Damore MA, et al. Safety, tolerability, and pharmacokinetics of anti-EGFRvIII antibody-drug conjugate AMG 595 in patients with recurrent malignant glioma expressing EGFRvIII. *Cancer Chemother Pharmacol*. 2019;84(2):327-36.
124. Ross HJ, Hart LL, Swanson PM, Rarick MU, Figlin RA, Jacobs AD, et al. A randomized, multicenter study to determine the safety and efficacy of the immunoconjugate SGN-15 plus docetaxel for the treatment of non-small cell lung carcinoma. *Lung cancer (Amsterdam, Netherlands)*. 2006;54(1):69-77.
125. Rottey S, Clarke J, Aung K, Machiels JP, Markman B, Heinhuis KM, et al. Phase I/IIa Trial of BMS-986148, an Anti-mesothelin Antibody-drug Conjugate, Alone or in Combination with Nivolumab in Patients with Advanced Solid Tumors. *Clin Cancer Res*. 2022;28(1):95-105.
126. Rudin CM, Pietanza MC, Bauer TM, Ready N, Morgensztern D, Glisson BS, et al. Rovalpituzumab tesirine, a DLL3-targeted antibody-drug conjugate, in recurrent small-cell lung cancer: a first-in-human, first-in-class, open-label, phase 1 study. *Lancet oncology*. 2017;18(1):42-51.
127. Sandhu S, McNeil CM, LoRusso P, Patel MR, Kabbarah O, Li C, et al. Phase I study of the anti-endothelin B receptor antibody-drug conjugate DEDN6526A in patients with metastatic or unresectable cutaneous, mucosal, or uveal melanoma. *Invest New Drugs*. 2020;38(3):844-54.

128. Sehn LH, Herrera AF, Flowers CR, Kamdar MK, McMillan A, Hertzberg M, et al. Polatuzumab Vedotin in Relapsed or Refractory Diffuse Large B-Cell Lymphoma. *Journal of clinical oncology*. 2020;38(2):155-65.
129. Shah MH, Lorigan P, O'Brien ME, Fossella FV, Moore KN, Bhatia S, et al. Phase I study of IMGN901, a CD56-targeting antibody-drug conjugate, in patients with CD56-positive solid tumors. *Invest New Drugs*. 2016;34(3):290-9.
130. Shapiro GI, Vaishampayan UN, LoRusso P, Barton J, Hua S, Reich SD, et al. First-in-human trial of an anti-5T4 antibody-monomethylauristatin conjugate, PF-06263507, in patients with advanced solid tumors. *Invest New Drugs*. 2017;35(3):315-23.
131. Sharman JP, Wheler JJ, Einhorn L, Dowlati A, Shapiro GI, Hilton J, et al. A phase 2, open-label study of brentuximab vedotin in patients with CD30-expressing solid tumors. *Invest New Drugs*. 2019;37(4):738-47.
132. Sheng X, Yan X, Wang L, Shi Y, Yao X, Luo H, et al. Open-label, multicenter, phase II study of RC48-ADC, a HER2-targeting antibody-drug conjugate, in patients with locally advanced or metastatic urothelial carcinoma. *Clinical Cancer Research*. 2021;27(1):43-51.
133. Shimizu T, Fujiwara Y, Yonemori K, Koyama T, Sato J, Tamura K, et al. First-in-Human Phase 1 Study of MORAb-202, an Antibody-Drug Conjugate Comprising Farletuzumab Linked to Eribulin Mesylate, in Patients with Folate Receptor-alpha-Positive Advanced Solid Tumors. *Clinical Cancer Research*. 2021;27(14):3905-15.
134. Shitara K, Iwata H, Takahashi S, Tamura K, Park H, Modi S, et al. Trastuzumab deruxtecan (DS-8201a) in patients with advanced HER2-positive gastric cancer: a dose-expansion, phase 1 study. *The lancet Oncology*. 2019.
135. Shitara K, Bang Y-J, Iwasa S, Sugimoto N, Ryu M-H, Sakai D, et al. Trastuzumab Deruxtecan in Previously Treated HER2-Positive Gastric Cancer. *New England Journal of Medicine*. 2020;382(25):2419-30.
136. Siena S, Di Bartolomeo M, Raghav K, Masuishi T, Loupakis F, Kawakami H, et al. Trastuzumab deruxtecan (DS-8201) in patients with HER2-expressing metastatic colorectal cancer (DESTINY-CRC01): a multicentre, open-label, phase 2 trial. *The Lancet Oncology*. 2021;22(6):779-89.
137. Socinski MA, Kaye FJ, Spigel DR, Kudrik FJ, Ponce S, Ellis PM, et al. Phase 1/2 Study of the CD56-Targeting Antibody-Drug Conjugate Lorvotuzumab Mertansine (IMGN901) in Combination With Carboplatin/Etoposide in Small-Cell Lung Cancer Patients With Extensive-Stage Disease. *Clin Lung Cancer*. 2017;18(1):68-76.e2.
138. Starodub AN, Ocean AJ, Shah MA, Guarino MJ, Picozzi VJ, Jr., Vahdat LT, et al. First-in-Human Trial of a Novel Anti-Trop-2 Antibody-SN-38 Conjugate, Sacituzumab Govitecan, for the Treatment of Diverse Metastatic Solid Tumors. *Clin Cancer Res*. 2015;21(17):3870-8.
139. Stathis A, Flinn IW, Madan S, Maddocks K, Freedman A, Weitman S, et al. Safety, tolerability, and preliminary activity of IMGN529, a CD37-targeted antibody-drug conjugate, in patients with relapsed or refractory B-cell non-Hodgkin lymphoma: a dose-escalation, phase I study. *Invest New Drugs*. 2018;36(5):869-76.
140. Stein EM, Walter RB, Erba HP, Fathi AT, Advani AS, Lancet JE, et al. A phase 1 trial of vadastuximab talirine as monotherapy in patients with CD33-positive acute myeloid leukemia. *Blood*. 2018;131(4):387-96.
141. Stewart AK, Krishnan AY, Singhal S, Boccia RV, Patel MR, Niesvizky R, et al. Phase I study of the anti-FcRH5 antibody-drug conjugate DFRF4539A in relapsed or refractory multiple myeloma. *Blood Cancer J*. 2019;9(2):17.
142. Straus DJ, Długosz-Danecka M, Connors JM, Alekseev S, Illés Á, Picardi M, et al. Brentuximab vedotin with chemotherapy for stage III or IV classical Hodgkin lymphoma (ECHELON-1): 5-year update of an international, open-label, randomised, phase 3 trial. *Lancet Haematol*. 2021;8(6):e410-e21.
143. Strickler JH, Weekes CD, Nemunaitis J, Ramanathan RK, Heist RS, Morgensztern D, et al. First-in-Human Phase I, Dose-Escalation and -Expansion Study of Telisotuzumab Vedotin, an Antibody-Drug Conjugate Targeting c-Met, in Patients With Advanced Solid Tumors. *J Clin Oncol*. 2018;36(33):3298-306.
144. Takahashi S, Uemura M, Kimura T, Kawasaki Y, Takamoto A, Yamaguchi A, et al. A phase I study of enfortumab vedotin in Japanese patients with locally advanced or metastatic urothelial carcinoma. *Invest New Drugs*. 2020;38(4):1056-66.
145. Takahashi S, Karayama M, Takahashi M, Watanabe J, Minami H, Yamamoto N, et al. Pharmacokinetics, Safety, and Efficacy of Trastuzumab Deruxtecan with Concomitant Ritonavir or Itraconazole in Patients with HER2-Expressing Advanced Solid Tumors. *Clin Cancer Res*. 2021;27(21):5771-80.
146. Tamura K, Tsurutani J, Takahashi S, Iwata H, Krop IE, Redfern C, et al. Trastuzumab deruxtecan (DS-8201a) in patients with advanced HER2-positive breast cancer previously treated with trastuzumab emtansine: a dose-expansion, phase 1 study. *The lancet Oncology*. 2019.
147. Tannir NM, Forero-Torres A, Ramchandren R, Pal SK, Ansell SM, Infante JR, et al. Phase I dose-escalation study of SGN-75 in patients with CD70-positive

- relapsed/refractory non-Hodgkin lymphoma or metastatic renal cell carcinoma. *Investigational new drugs*. 2014;32(6):1246-57.
148. Terui Y, Rai S, Izutsu K, Yamaguchi M, Takizawa J, Kuroda J, et al. A phase 2 study of polatuzumab vedotin + bendamustine + rituximab in relapsed/refractory diffuse large B-cell lymphoma. *Cancer Sci*. 2021;112(7):2845-54.
149. Thompson JA, Motzer RJ, Molina AM, Choueiri TK, Heath EI, Redman BG, et al. Phase I Trials of Anti-ENPP3 Antibody-Drug Conjugates in Advanced Refractory Renal Cell Carcinomas. *Clin Cancer Res*. 2018;24(18):4399-406.
150. Chiradoni Thungappa S, Maksud T, Raut N, Nagarkar R, Batra U, Kumar S, et al. Comparison of the Efficacy, Safety, Pharmacokinetic and Immunogenicity of UJVIRA (ZRC-3256, Trastuzumab Emtansine) With the Kadcyła (Trastuzumab Emtansine) in the Treatment of HER2-Positive Metastatic Breast Cancer: A Randomized, Open-Label, Multicenter Study in India. *Clin Breast Cancer*. 2022;22(4):300-7.
151. Tilly H, Morschhauser F, Sehn LH, Friedberg JW, Trněný M, Sharman JP, et al. Polatuzumab Vedotin in Previously Untreated Diffuse Large B-Cell Lymphoma. *New England journal of medicine*. 2022;386(4):351-63.
152. Tolaney SM, Do KT, Eder JP, LoRusso PM, Weekes CD, Chandarlapaty S, et al. A Phase I Study of DLYE5953A, an Anti-LY6E Antibody Covalently Linked to Monomethyl Auristatin E, in Patients with Refractory Solid Tumors. *Clin Cancer Res*. 2020;26(21):5588-97.
153. Trněný M, Verhoef G, Dyer MJ, Ben Yehuda D, Patti C, Canales M, et al. A phase II multicenter study of the anti-CD19 antibody drug conjugate coltuximab ravtansine (SAR3419) in patients with relapsed or refractory diffuse large B-cell lymphoma previously treated with rituximab-based immunotherapy. *Haematologica*. 2018;103(8):1351-8.
154. Trudel S, Lendvai N, Popat R, Voorhees PM, Reeves B, Libby EN, et al. Antibody-drug conjugate, GSK2857916, in relapsed/refractory multiple myeloma: an update on safety and efficacy from dose expansion phase I study. *Blood Cancer J*. 2019;9(4):37.
155. Tsurutani J, Iwata H, Krop I, Jänne PA, Doi T, Takahashi S, et al. Targeting HER2 with Trastuzumab Deruxtecan: A Dose-Expansion, Phase I Study in Multiple Advanced Solid Tumors. *Cancer Discov*. 2020;10(5):688-701.
156. Udagawa H, Akamatsu H, Tanaka K, Takeda M, Kanda S, Kirita K, et al. Phase I safety and pharmacokinetics study of rovalpituzumab tesirine in Japanese patients with advanced, recurrent small cell lung cancer. *Lung Cancer*. 2019;135:145-50.
157. Vahdat LT, Schmid P, Forero-Torres A, Blackwell K, Telli ML, Melisko M, et al. Glembatumumab vedotin for patients with metastatic, gpNMB overexpressing, triple-negative breast cancer (“METRIC”): a randomized multicenter study. *NPJ breast cancer*. 2021;7(1).
158. Van Den Bent M, Eoli M, Sepulveda JM, Smits M, Walenkamp A, Frenel JS, et al. INTELLANCE 2/EORTC 1410 randomized phase II study of Depatux-M alone and with temozolomide vs temozolomide or lomustine in recurrent EGFR amplified glioblastoma. *Neuro Oncol*. 2020;22(5):684-93.
159. Verma S, Miles D, Gianni L, Krop IE, Welslau M, Baselga J, et al. Trastuzumab Emtansine for HER2-Positive Advanced Breast Cancer. *New England Journal of Medicine*. 2012;367(19):1783-91.
160. Vij R, Nath R, Afar DEH, Mateos MV, Berdeja JG, Raab MS, et al. First-in-Human Phase I Study of ABBV-838, an Antibody-Drug Conjugate Targeting SLAMF7/CS1 in Patients with Relapsed and Refractory Multiple Myeloma. *Clin Cancer Res*. 2020;26(10):2308-17.
161. von Minckwitz G, Huang CS, Mano MS, Loibl S, Mamounas EP, Untch M, et al. Trastuzumab Emtansine for Residual Invasive HER2-Positive Breast Cancer. *New England journal of medicine*. 2019;380(7):617-28.
162. Waqar SN, Redman MW, Arnold SM, Hirsch FR, Mack PC, Schwartz LH, et al. A Phase II Study of Telisotuzumab Vedotin in Patients With c-MET-positive Stage IV or Recurrent Squamous Cell Lung Cancer (LUNG-MAP Sub-study S1400K, NCT03574753). *Clinical Lung Cancer*. 2021;22(3):170-7.
163. Weekes CD, Lamberts LE, Borad MJ, Voortman J, McWilliams RR, Diamond JR, et al. Phase I Study of DMOT4039A, an Antibody-Drug Conjugate Targeting Mesothelin, in Patients with Unresectable Pancreatic or Platinum-Resistant Ovarian Cancer. *Mol Cancer Ther*. 2016;15(3):439-47.
164. Yardley DA, Weaver R, Melisko ME, Saleh MN, Arena FP, Forero A, et al. EMERGE: A Randomized Phase II Study of the Antibody-Drug Conjugate Glembatumumab Vedotin in Advanced Glycoprotein NMB-Expressing Breast Cancer. *J Clin Oncol*. 2015;33(14):1609-19.
165. Younes A, Bartlett NL, Leonard JP, Kennedy DA, Lynch CM, Sievers EL, et al. Brentuximab vedotin (SGN-35) for relapsed CD30-positive lymphomas. *N Engl J Med*. 2010;363(19):1812-21.
166. Yu EY, Petrylak DP, O'Donnell PH, Lee J-L, van der Heijden MS, Loriot Y, et al. Enfortumab vedotin after PD-1 or PD-L1 inhibitors in cisplatin-ineligible

- patients with advanced urothelial carcinoma (EV-201): a multicentre, single-arm, phase 2 trial. *Lancet Oncology*. 2021;22(6):872-82.
167. Zhang J, Ji D, Shen W, Xiao Q, Gu Y, O'Shaughnessy J, et al. Phase I Trial of a Novel Anti-HER2 Antibody-Drug Conjugate, ARX788, for the Treatment of HER2-Positive Metastatic Breast Cancer. *Clin Cancer Res*. 2022:Of1-of10.
168. Zinzani PL, Santoro A, Gritti G, Brice P, Barr PM, Kuruvilla J, et al. Nivolumab Combined With Brentuximab Vedotin for Relapsed/Refractory Primary Mediastinal Large B-Cell Lymphoma: Efficacy and Safety From the Phase II CheckMate 436 Study. *J Clin Oncol*. 2019;37(33):3081-9.
169. Shitara K, Bang YJ, Iwasa S, Sugimoto N, Ryu MH, Sakai D, et al. Trastuzumab Deruxtecan in Previously Treated HER2-Positive Gastric Cancer. *N Engl J Med*. 2020;382(25):2419-30.
